# Supplementary material for: The KRASG12C Inhibitor MRTX849 Provides Insight toward Therapeutic Susceptibility of KRAS-Mutant Cancers in Mouse Models and Patients
Source: Oxford University Press journal article supplement (doi:10.1158/2159-8290.cd-19-1167), 2019-10-28
Supplement: 21598290cd191167-sup-230052_1_supp_5843939_pzkxns.xlsx [file 21598290cd191167-sup-230052_1_supp_5843939_pzkxns.xlsx]

## Sheet: Raw data
Sample ID	Model	Description	Time point (hrs)	EGFR_Total	EGFR_Y1068 (Lower values had high CVs)	EGFR_Y1173	HER2_Total	HER2_Y1248	HER3_Total	HER3_Y1289	c_Raf_S338	Raf_S259	B_Raf_S445	p70S6_Kinase_T412	S6_Ribosomal_Protein_S235_S236	S6_Ribosomal_Protein_S240_S244	ERK_1_2_T202_Y204	ERK_1_2_Total	AKT_S473	AKT_T308	4E_BP1_S65	4E_BP1_T37_T46	4E_BP1_T70	MEK1_S298	MEK_1_2_S217_S221	c_Myc_Total	c_Myc_S62	p90RSK_S380	p90RSK_T359_S363	Caspase_3_Cleaved_D175	MHC_Class_I	HLA_DR	HLA_DR_DP_DQ_DX
1	KYSE-410	Vehicle	6	27722.5	8358.21	12977.9	24343	9367.49	18996.3	16797.7	29732.6	30946	28853.9	17120	27446.7	31571.2	12100.5	18434.9	15835.4	8621.38	25336.5	30333.2	9509.06	19187.2	18713.5	36315.5	15584	12926.1	12161.1	8308.21	6581.38	11136.7	3133.8
2	KYSE-410	Vehicle	6	27446.7	8333.18	12112.6	22247.8	8612.76	17606.1	15184	26108.1	30946	28001.1	14515.9	21829.1	30946	9779.07	16714	13029.9	7324.65	23623.6	31257.1	10249.7	18196.8	17997.7	30333.2	13187.2	11373	11872.7	9117.95	6496.38	12419.2	3408.41
3	KYSE-410	849 0.1nM	6	28853.9	6946.55	9604.63	20640.3	7638.83	13413.3	17000.5	25848.3	28001.1	26635.5	15033	26903.2	31888.5	10796.7	17961.7	13877.2	7769.8	25848.3	30333.2	10916.2	23155.8	18490.3	39735.5	11192.5	9414.44	13266.5	6105.83	3904.95	10127.4	548.946
4	KYSE-410	849 0.1nM	6	28001.1	7816.56	10280.5	23155.8	9145.35	16531.1	18694.8	29143.9	35954.1	32532.7	15093.2	33860.4	31888.5	8928.47	18638.8	14943	6960.45	23861	26108.1	10383.8	21268.9	19653.3	43477.6	12357.3	10107.2	11533.4	5458.88	3751.83	10016.6	378.797
5	KYSE-410	849 0.3nM	6	26903.2	5014.06	11059	18939.4	5808.05	12246.6	15615.2	25591.1	25848.3	25336.5	17292	22925.4	30031.4	12569.1	15428.9	12493.9	8383.33	24587.7	33523.4	10614.8	20847.7	15978.5	34544.4	9200.38	8374.95	11568	4698.51	2930.71	9127.07	1024.54
6	KYSE-410	849 0.3nM	6	26370.5	6386.87	8561.24	20537.3	7302.7	12848.7	16383	23623.6	30333.2	27722.5	14530.4	24834.8	30333.2	10435.8	16663.9	11533.4	7244.51	22471.4	29143.9	9662.42	21655.2	15898.8	35596.4	9200.38	7273.55	11036.9	5059.39	3377.87	10290.7	602.447
7	KYSE-410	849 0.9nM	6	28566.8	6444.61	11896.5	19225.6	6279.21	15552.9	16171.4	27173.6	26108.1	25848.3	12493.9	23155.8	31571.2	8275.05	16106.9	11696	7302.7	22925.4	32532.7	11081.1	20010.3	15803.7	34200.6	11014.9	9405.03	13319.7	8038.51	4582.5	13042.9	2423.58
8	KYSE-410	849 0.9nM	6	28001.1	6925.74	12913.1	23861	7966.49	17872.2	17765.3	31257.1	34200.6	29436.8	15537.3	27446.7	30031.4	9556.72	16399.4	13656.9	8839.63	24100.8	28566.8	10796.7	18601.6	17836.5	36680.5	12016.1	10404.6	11203.7	9045.29	4661.07	12357.3	2633.32
9	KYSE-410	849 2.7nM	6	26635.5	6829.46	12848.7	24343	7895.12	18361.3	17188.6	32532.7	34891.6	28853.9	17137.1	29732.6	28566.8	10178.2	17292	17344	9966.65	23388.5	26903.2	10456.7	18508.8	18087.9	37797.6	11125.6	9808.45	9652.77	8638.64	4689.12	11896.5	2718.95
10	KYSE-410	849 2.7nM	6	27173.6	7435.34	12320.3	23155.8	7824.38	16465.1	17188.6	27446.7	35242.2	28853.9	14143.4	28282.5	29732.6	8484.53	18069.8	13253.3	7832.21	22925.4	26370.5	9537.63	17712	17925.9	35596.4	10087	8217.32	8103.08	7855.74	4438.18	12746.3	2694.59
11	KYSE-410	849 8.1nM	6	26903.2	7879.35	14157.5	23388.5	9000.18	20070.4	18471.8	27446.7	30333.2	26635.5	15756.4	32209	32859.6	6561.66	19574.8	13200.4	9376.86	24100.8	28282.5	10829.2	19399.5	16301.3	29436.8	12431.6	11908.4	11305	10583	6154.88	13226.8	4281.25
12	KYSE-410	849 8.1nM	6	27173.6	10446.3	14143.4	25591.1	10446.3	20434.9	17588.5	27173.6	34200.6	30031.4	14943	28566.8	31571.2	5784.86	17659	13108.3	8433.78	24100.8	28282.5	11114.4	17570.9	17641.3	28853.9	10764.4	10636	10829.2	9837.93	6317	13187.2	4750.47
13	KYSE-410	849 24nM	6	26903.2	11896.5	14414.6	25848.3	11003.8	19870.7	17535.8	22925.4	30031.4	29436.8	13656.9	33860.4	33189.9	3766.87	17344	9907.03	7186.79	23388.5	29143.9	11350.3	17961.7	16058.6	19438.3	8333.18	9320.77	9730.3	8586.96	6002.91	11742.9	4117.49
14	KYSE-410	849 24nM	6	26903.2	10732.2	13684.2	22697.3	9857.62	17430.9	16966.6	21916.6	26370.5	26108.1	12720.9	24587.7	32532.7	4376.48	15306	9063.41	7450.23	24100.8	32859.6	10229.2	18807.3	14720.6	17051.6	6939.61	7910.92	9054.35	8544.14	5710.14	12733.6	4568.77
15	KYSE-410	849 73nM	6	27722.5	8708.02	12544	20910.4	9907.03	17588.5	15898.8	20050.3	25336.5	24587.7	13121.4	25591.1	34200.6	3558.16	17765.3	8777.97	8358.21	21036.2	31257.1	8078.81	18826.1	15214.4	14501.4	10178.2	9433.29	11766.4	10477.7	6348.66	11860.9	3666.53
16	KYSE-410	849 73nM	6	29143.9	11849	13399.9	25084.4	12246.6	20312.7	17854.3	22247.8	31257.1	28566.8	14617.9	32209	32209	3759.35	18124.1	10301	8552.68	23388.5	30031.4	8078.81	18920.5	17051.6	14661.8	10066.8	10026.6	11660.9	9200.38	6601.16	11544.9	3364.38
17	KYSE-410	Afatinib	6	32209	674.519	12682.8	18015.7	1272.83	22697.3	10818.4	22247.8	30946	35596.4	7532.63	24834.8	30333.2	3371.12	20434.9	2435.73	5151.28	20030.3	31888.5	16236.2	20973.2	17997.7	12344.9	13226.8	11136.7	11293.7	12977.9	5393.77	11361.7	4023.87
18	KYSE-410	Afatinib	6	29436.8	637.147	11731.1	16647.2	1215.61	23623.6	10916.2	21720.2	29143.9	32532.7	6946.55	19187.2	28566.8	3449.55	20994.2	2930.71	5513.75	18807.3	30333.2	14603.3	20723	17535.8	11544.9	12506.5	10540.7	10764.4	13780.4	6051.13	12913.1	4999.04
19	KYSE-410	Afat + 849 0.1	6	30638.1	464.054	9376.86	12733.6	1087.9	20150.8	9916.94	24343	28282.5	25848.3	11407.2	14256.9	28566.8	4914.77	17188.6	2273.33	5286.97	22471.4	34891.6	9036.26	20231.6	16268.7	9246.5	9154.49	9976.63	11766.4	9926.87	6843.13	11602.8	4196.47
20	KYSE-410	Afat + 849 0.1	6	26370.5	504.718	9897.13	16898.8	1151.71	25848.3	10583	27446.7	35954.1	31257.1	10270.2	22026.5	26635.5	4745.73	19692.6	2694.59	5192.65	22697.3	27722.5	8883.94	19244.9	20475.8	11980.1	9877.35	11602.8	10604.1	10363	7302.7	11521.8	2594.11
21	KYSE-410	Afat + 849 0.3	6	27722.5	585.813	10850.9	18545.8	1208.34	24100.8	11373	25848.3	32209	33860.4	9614.23	25084.4	28001.1	3494.69	19791.3	2428.43	4451.52	22247.8	29732.6	10137.5	19283.4	18471.8	12357.3	9237.25	10229.2	9701.16	10036.7	7002.34	11092.2	2171.12
22	KYSE-410	Afat + 849 0.3	6	28282.5	509.791	10477.7	17818.6	1208.34	24834.8	11339	23155.8	33523.4	32209	8324.85	20414.5	26635.5	3554.61	19831	2328.55	4315.64	20973.2	28282.5	10352.7	18215	18288	11908.4	8647.28	8408.51	9054.35	10818.4	6863.68	12720.9	3124.41
23	KYSE-410	Afat + 849 0.9	6	28566.8	493.736	11081.1	14030.7	1047.33	19791.3	10290.7	21375.5	25084.4	24100.8	7002.34	18033.7	28282.5	2351.95	17712	1584.46	4651.75	20496.3	31571.2	11533.4	20475.8	14913.2	8638.64	10850.9	8324.85	10905.3	13147.7	6960.45	11070.1	3967.93
24	KYSE-410	Afat + 849 0.9	6	28282.5	483.959	11789.9	16797.7	1140.25	24100.8	11407.2	24343	32209	30031.4	8094.98	21655.2	25848.3	2440.6	18713.5	2509.9	4703.21	20353.3	28001.1	11125.6	18087.9	16915.7	9847.76	9769.3	8901.72	9976.63	13974.6	6654.18	10850.9	4192.28
25	KYSE-410	Afat + 849 2.7	6	26370.5	488.823	10992.8	18416.5	1190.35	28282.5	11684.3	19910.5	30333.2	30333.2	5967	20868.6	25084.4	1941.08	21590.3	2197.33	4656.41	17747.5	27173.6	13453.6	19091.5	17783	7746.53	8857.32	7958.54	8866.19	11766.4	6438.18	11591.2	4577.92
26	KYSE-410	Afat + 849 2.7	6	29143.9	498.199	11327.6	17606.1	1053.63	24834.8	11373	18434.9	25336.5	30031.4	5345.44	13711.6	24834.8	1679.08	18882.7	1701.05	4372.11	20070.4	33189.9	13121.4	20952.2	15867.1	6528.94	7390.86	6884.31	9986.6	10775.2	6925.74	12682.8	5382.99
27	KYSE-410	Afat + 849 8.1	6	32532.7	553.355	12028.1	13752.8	1124.39	22247.8	10614.8	18769.7	31571.2	33523.4	6522.42	16220	26370.5	1156.32	20806.1	1595.59	4924.61	19673	29732.6	15168.9	21141.6	18564.4	5710.14	9798.65	9081.55	12185.5	13293.1	5580.31	11136.7	4072.45
28	KYSE-410	Afat + 849 8.1	6	29732.6	609.111	13507.5	14824	1142.53	26635.5	12493.9	19791.3	35596.4	37049.1	6241.65	16383	22247.8	1046.28	20723	1433.68	4759.99	17979.7	25336.5	13029.9	17800.8	17518.3	5878.16	10342.3	9054.35	10818.4	15662.1	5854.7	10668	4302.71
29	KYSE-410	Afat + 849 24	6	27722.5	465.914	13056	11014.9	889.803	19264.1	10117.3	15537.3	25848.3	28001.1	6002.91	11192.5	21015.2	1065.29	16814.5	1450.99	4865.86	17017.5	31888.5	13521	17309.3	15168.9	4442.62	8283.33	8839.63	9916.94	13534.5	4793.42	10259.9	4559.65
30	KYSE-410	Afat + 849 24	6	29143.9	467.781	12406.8	14735.3	1057.86	23155.8	11626	17396.1	33523.4	32532.7	5949.13	11696	19850.8	953.367	16898.8	1536.1	4496.26	13548.1	29143.9	13960.7	16547.7	13069	4088.77	7863.6	7942.63	9302.14	15962.5	5602.68	12406.8	5469.82
31	KYSE-410	Afat + 849 73	6	31888.5	567.363	11626	14314.1	1117.67	21676.9	11036.9	16285	22925.4	24834.8	5420.8	12469	24834.8	1126.65	18288	2212.77	5182.28	17361.3	32532.7	14058.7	18788.5	15506.3	4726.78	9818.27	8892.83	11136.7	17676.6	6247.89	11556.5	3920.6
32	KYSE-410	Afat + 849 73	6	32532.7	548.397	13266.5	17961.7	1226.6	24343	11568	16983.5	28566.8	31257.1	5513.75	16010.5	24834.8	1115.44	20030.3	1864.97	4827.1	17171.4	29732.6	14171.7	17908	17274.7	5074.58	9916.94	9633.49	10689.3	16915.7	6075.38	10678.6	3615.55
33	KYSE-410	RMC	6	29732.6	22471.4	14271.2	24100.8	19673	18788.5	17854.3	22925.4	22925.4	24587.7	8821.97	29143.9	34891.6	2583.76	19380.1	10117.3	6594.56	23623.6	30031.4	10604.1	20130.7	15244.9	10678.6	14242.7	10076.9	11248.6	15819.5	6285.5	11498.8	4473.83
34	KYSE-410	RMC	6	32859.6	20681.6	15475.3	27722.5	19791.3	21894.7	21036.2	26903.2	27446.7	32209	9740.04	31888.5	33860.4	2702.68	19535.7	10107.2	7295.41	23388.5	29143.9	10219	18453.3	17854.3	12900.2	14676.5	10829.2	11568	16317.6	6418.89	11544.9	4455.97
35	KYSE-410	RMC + 849 0.1	6	31257.1	23623.6	16865.1	28282.5	21439.7	22026.5	20496.3	25591.1	26370.5	32209	8804.34	31257.1	33860.4	2499.88	19438.3	10363	7230.04	21763.7	28282.5	10383.8	18939.4	16730.7	10290.7	13359.7	10604.1	10363	16333.9	6154.88	11259.9	4591.67
36	KYSE-410	RMC + 849 0.1	6	26635.5	21482.6	14443.5	24834.8	19225.6	19890.5	16848.2	21720.2	24100.8	28566.8	7310.01	29436.8	33860.4	2328.55	18996.3	11103.3	6775.04	19910.5	26903.2	9740.04	18269.7	16983.5	10249.7	13266.5	8708.02	9897.13	17818.6	6781.81	11766.4	5009.04
37	KYSE-410	RMC + 849 0.3	6	33860.4	21763.7	14385.8	29732.6	20333	21311.5	18657.4	25084.4	28566.8	31571.2	10807.5	30946	35954.1	2487.42	21633.5	11672.6	7593.14	23623.6	30638.1	12848.7	19072.4	17483.3	11125.6	15867.1	11742.9	12810.2	13932.8	6142.58	12357.3	5819.67
38	KYSE-410	RMC + 849 0.3	6	33860.4	24343	15851.2	31257.1	25084.4	24343	21015.2	28853.9	34544.4	35242.2	14058.7	37421.5	32209	2727.12	21982.5	15693.5	10404.6	21120.5	26370.5	11968.1	19890.5	19187.2	12185.5	15851.2	12028.1	11203.7	14735.3	6444.61	11992.1	5151.28
39	KYSE-410	RMC+ 849 0.9	6	33523.4	22247.8	15367.3	28853.9	22247.8	22247.8	19673	25336.5	29143.9	32209	11568	28566.8	31571.2	2160.29	21439.7	13711.6	8982.2	21916.6	29732.6	12569.1	20171	17257.5	9788.86	14299.8	11248.6	10949	12784.6	5486.25	11136.7	4969.13
40	KYSE-410	RMC+ 849 0.9	6	30333.2	23388.5	15428.9	26635.5	22697.3	21568.7	17606.1	23155.8	30333.2	30333.2	10168	26108.1	29732.6	2063.17	19264.1	14185.9	8103.08	19673	25848.3	10604.1	17500.8	16187.6	9701.16	12990.8	9471.1	10016.6	15444.4	5854.7	13616	5064.44
41	KYSE-410	RMC + 849 2.7	6	35954.1	28853.9	14530.4	30031.4	28853.9	20110.6	18324.6	18583	25848.3	31257.1	9376.86	26370.5	32209	1314.22	21120.5	7879.35	6323.32	22026.5	37421.5	12632.1	18471.8	14972.9	8518.54	13561.6	10435.8	12913.1	12307.9	5530.31	12016.1	6781.81
42	KYSE-410	RMC + 849 2.7	6	31888.5	26108.1	15168.9	31888.5	27722.5	22925.4	20743.7	20868.6	35596.4	38561.1	11614.4	39340.1	30333.2	1565.56	22925.4	13794.1	7346.66	20251.8	22697.3	11125.6	16898.8	18638.8	10872.6	16203.8	11908.4	12644.8	14705.8	6057.18	11672.6	5442.54
43	KYSE-410	RMC + 849 8.1	6	28853.9	26370.5	13891	28853.9	27173.6	21525.6	21982.5	17908	31257.1	31257.1	12506.5	30946	28001.1	1225.37	20764.5	10425.4	8510.02	19516.2	24343	11271.1	15506.3	15962.5	8283.33	13766.6	10249.7	10764.4	14515.9	5642.03	11170.1	5585.9
44	KYSE-410	RMC + 849 8.1	6	27722.5	27173.6	13849.4	24100.8	25336.5	18732.2	17641.3	16848.2	28853.9	29143.9	10117.3	24587.7	26903.2	1230.28	18713.5	12926.1	8038.51	18160.4	24100.8	9956.69	14617.9	14472.4	7816.56	12469	9081.55	9528.09	18087.9	5135.85	11282.4	6057.18
45	KYSE-410	RMC + 849 24	6	31571.2	25336.5	12848.7	23623.6	24587.7	17326.6	18106	14256.9	21354.1	25591.1	8510.02	26635.5	27446.7	1159.8	20211.3	6601.16	5420.8	19751.8	25591.1	10614.8	12222.1	11452.9	7108.17	13160.8	9867.48	11731.1	13440.1	6191.92	11316.3	8358.21
46	KYSE-410	RMC + 849 24	6	33523.4	23388.5	13521	22925.4	22925.4	18342.9	18583	15063	24343	30031.4	10198.5	23388.5	26635.5	1121.03	18601.6	7230.04	6222.95	18306.3	24587.7	9509.06	10593.5	12406.8	7280.83	13480.5	9798.65	10625.4	15724.9	6775.04	10850.9	7079.79
47	KYSE-410	RMC + 849 73	6	30946	26108.1	13373.1	22026.5	24834.8	16465.1	15599.6	12861.6	20272.1	26635.5	9182	22925.4	26635.5	1251.38	17908	8638.64	6904.99	18033.7	26635.5	10006.6	11498.8	11956.1	6235.41	12657.4	9283.55	10467.2	14429.1	5530.31	12682.8	6620.99
48	KYSE-410	RMC + 849 73	6	30031.4	21057.2	17137.1	21807.3	20496.3	16714	17171.4	12544	22697.3	27722.5	9081.55	20211.3	24100.8	966.808	16580.8	7465.15	5825.5	17137.1	21872.8	7895.12	9633.49	10861.7	6130.3	11136.7	7669.45	9857.62	16465.1	5502.73	11672.6	7361.36
49	KYSE-410	Vistusertib	6	29732.6	6741.25	14285.5	30031.4	7958.54	21504.1	18620.2	38948.7	28566.8	24587.7	4999.04	199.138	854.059	34891.6	15978.5	966.808	11837.2	2335.54	3533.34	1570.27	15962.5	19990.2	23861	14299.8	14720.6	11339	12197.7	6836.29	13240	4315.64
50	KYSE-410	Vistusertib	6	26108.1	8813.14	14617.9	30638.1	9509.06	21938.5	18527.3	37797.6	31571.2	26108.1	4856.14	148.859	904.154	32532.7	17292	1083.55	9907.03	2409.08	3751.83	1542.25	17188.6	21742	28001.1	16448.7	16187.6	10435.8	12185.5	6974.39	13766.6	3916.68
51	KYSE-410	Vistusertib + 849 100nM	6	26635.5	15078.1	16123	31571.2	15244.9	23623.6	19594.4	33189.9	27722.5	26108.1	3583.16	106.591	639.061	10404.6	16747.4	751.447	10883.5	1956.67	2972.03	1501.17	16236.2	18142.3	11373	7615.95	10087	8716.73	11248.6	7450.23	16106.9	4600.87
52	KYSE-410	Vistusertib + 849 100nM	6	24100.8	13534.5	15819.5	31257.1	14342.8	25336.5	19322	32859.6	33860.4	26635.5	3453.01	133.22	688.145	9172.82	18490.3	755.969	7259.02	2969.06	2866.94	1543.8	15398.1	18471.8	13480.5	7800.94	9136.2	7280.83	12307.9	7832.21	15093.2	4822.27
55	KYSE-410	Everolimus	6	27173.6	8358.21	110194	32532.7	9172.82	24343	19574.8	37049.1	37421.5	32209	4367.74	261.125	1350.19	17518.3	19732.1	24834.8	15898.8	8135.56	27722.5	7769.8	17676.6	21525.6	29732.6	19206.4	14256.9	11350.3	12258.8	7288.11	12759.1	5024.09
56	KYSE-410	Everolimus	6	27446.7	9720.58	16285	34891.6	10927.1	24834.8	21568.7	39735.5	41357.1	35242.2	4469.36	253.408	1328.76	17553.3	20994.2	26370.5	15398.1	8919.54	26370.5	7638.83	18453.3	22925.4	32532.7	19614	13988.6	11081.1	12544	8119.31	13752.8	5255.34
57	KYSE-410	Everolimus + 849 100nM	6	29143.9	14101	15428.9	36680.5	14002.6	25848.3	22471.4	31888.5	37049.1	34544.4	3405	193.253	1107.65	5919.46	20251.8	18160.4	13575.2	7585.55	29732.6	8103.08	17641.3	19555.3	14200	10332	10046.7	8708.02	9946.74	8006.43	13108.3	5244.84
58	KYSE-410	Everolimus + 849 100nM	6	26108.1	14868.5	15078.1	36315.5	14883.4	27173.6	23388.5	33860.4	41357.1	35596.4	3264.95	229.293	1306.36	6870.55	21720.2	22026.5	15994.5	7824.38	25848.3	8734.18	17413.5	21611.9	16090.8	10981.9	10107.2	8151.85	10488.1	8062.67	14086.9	4851.29
61	KYSE-410	Vehicle	24	27722.5	21247.6	15914.7	24834.8	20660.9	20994.2	21698.5	38177.4	32532.7	24834.8	17120	32859.6	31257.1	10938	16614	15709.2	6185.73	23623.6	25084.4	7974.47	16614	25591.1	35596.4	13108.3	11181.3	10006.6	8283.33	6431.74	11992.1	3908.86
62	KYSE-410	Vehicle	24	28282.5	20702.3	15835.4	24834.8	21439.7	21036.2	22697.3	38948.7	34891.6	26108.1	18251.5	28566.8	29436.8	11226.1	15584	14530.4	7700.19	23155.8	23623.6	7420.49	16597.4	24587.7	33189.9	11544.9	11920.3	10352.7	9614.23	6829.46	12823.1	4027.9
63	KYSE-410	849 0.1nM	24	25336.5	13904.9	9672.09	18288	15229.7	13279.8	18844.9	31888.5	28001.1	20130.7	16915.7	27446.7	30946	11327.6	14242.7	13877.2	6496.38	23155.8	25336.5	7615.95	17908	20931.3	31888.5	7926.76	6741.25	8681.94	6111.95	4473.83	10446.3	815.662
64	KYSE-410	849 0.1nM	24	22697.3	17694.3	10342.3	19457.7	18051.8	14617.9	20070.4	31888.5	30946	23388.5	17800.8	33523.4	30333.2	10342.3	16058.6	16465.1	6988.35	23388.5	22247.8	7368.72	17120	24587.7	37421.5	8839.63	7785.36	8266.78	6981.37	5182.28	11696	999.245
65	KYSE-410	849 0.3nM	24	26108.1	18087.9	10137.5	19322	18251.5	14129.2	20251.8	27722.5	26635.5	22247.8	14385.8	29732.6	33189.9	8250.26	15321.3	12173.3	5197.85	24587.7	26108.1	7950.58	18977.3	22697.3	32209	6470.44	7832.21	8839.63	4394.02	4731.51	11092.2	2188.56
66	KYSE-410	849 0.3nM	24	27446.7	19850.8	10127.4	17943.8	20599	13835.6	20191.2	27722.5	28566.8	23623.6	13319.7	27722.5	31888.5	7982.44	15693.5	11591.2	4577.92	26903.2	26108.1	8258.51	18977.3	23861	33523.4	5675.99	6476.92	9209.59	4121.62	4779.06	12173.3	1185.6
67	KYSE-410	849 0.9nM	24	23861	14632.5	12990.8	17961.7	15693.5	14328.4	18826.1	30638.1	24834.8	20070.4	13752.8	25336.5	28853.9	10127.4	12149	12161.1	7465.15	21504.1	23155.8	7310.01	14661.8	18233.2	23388.5	6587.97	7065.65	8982.2	8777.97	4914.77	10456.7	2527.54
68	KYSE-410	849 0.9nM	24	23861	17925.9	13108.3	20333	17818.6	15882.9	19950.3	32532.7	30031.4	23155.8	14928.1	28282.5	28282.5	10467.2	13684.2	16252.5	8400.11	22471.4	22247.8	7646.48	14750	22247.8	28001.1	8217.32	8383.33	8848.47	9072.47	5334.76	11944.2	3232.47
69	KYSE-410	849 2.7nM	24	27446.7	22471.4	14058.7	23155.8	24587.7	17553.3	24343	32532.7	29732.6	24587.7	13174	29436.8	32209	9108.83	15260.2	17925.9	7072.72	23388.5	25591.1	9191.19	15898.8	21375.5	26635.5	7593.14	7800.94	7990.43	6870.55	5475.29	11293.7	3029.04
70	KYSE-410	849 2.7nM	24	26903.2	19438.3	12733.6	22247.8	20070.4	16236.2	22247.8	32209	30946	23388.5	16187.6	23861	28282.5	12295.6	14357.1	20312.7	10732.2	22026.5	25591.1	8777.97	15017.9	21015.2	25336.5	6451.06	7934.69	7762.03	8062.67	5313.47	12332.6	3384.63
71	KYSE-410	849 8.1nM	24	23861	32859.6	16865.1	26635.5	32209	20889.5	25848.3	30638.1	29732.6	24587.7	15994.5	32209	33523.4	9442.72	16547.7	13877.2	7517.58	22697.3	24587.7	8242.02	17641.3	20764.5	20130.7	7222.82	9265.01	9490.06	8510.02	6802.19	12695.5	4880.49
72	KYSE-410	849 8.1nM	24	22925.4	30638.1	15882.9	24587.7	31888.5	21525.6	25848.3	31571.2	31571.2	24834.8	18306.3	30031.4	31571.2	11125.6	17017.5	15867.1	9966.65	22697.3	22471.4	7934.69	17068.7	22925.4	21829.1	8143.7	10721.4	9265.01	8813.14	6509.38	13373.1	5146.13
73	KYSE-410	849 24nM	24	25591.1	28001.1	15244.9	26635.5	25848.3	19950.3	24343	37049.1	30638.1	25336.5	27446.7	30031.4	31571.2	58688.5	15994.5	15882.9	8333.18	20578.5	25084.4	6687.53	18657.4	27173.6	16797.7	5409.97	18863.8	10519.6	7237.28	5738.77	12028.1	3781.97
74	KYSE-410	849 24nM	24	22925.4	26635.5	14853.6	26903.2	25591.1	20743.7	25591.1	37421.5	30638.1	24100.8	23388.5	30946	29732.6	49020.8	15914.7	15851.2	7044.48	18996.3	21894.7	6355.02	18051.8	26635.5	17171.4	5497.23	16848.2	10488.1	9633.49	6235.41	13200.4	4861
75	KYSE-410	849 73nM	24	25336.5	24587.7	15413.5	25848.3	24343	20723	24343	36315.5	29732.6	22471.4	21057.2	27173.6	28853.9	45251.9	16026.5	13670.6	7193.98	20952.2	25084.4	6960.45	16814.5	23388.5	14958	6877.43	16415.8	11430	10593.5	6960.45	11825.3	4505.26
76	KYSE-410	849 73nM	24	26108.1	25336.5	14972.9	27173.6	21829.1	20599	24834.8	38948.7	29143.9	22247.8	23155.8	24343	24587.7	43477.6	14429.1	13359.7	8291.61	18788.5	22925.4	5878.16	14371.5	22471.4	14574.1	6870.55	16026.5	11407.2	9887.24	6674.17	12382	4518.79
77	KYSE-410	Afatinib	24	25591.1	333.286	11801.7	15260.2	1113.21	27722.5	12506.5	24100.8	24834.8	25848.3	8883.94	11339	26108.1	5442.54	22697.3	2208.35	5843	20516.8	33523.4	10818.4	21120.5	22697.3	6727.78	8143.7	13240	9956.69	11487.3	7354	12569.1	7030.41
78	KYSE-410	Afatinib	24	28853.9	296.19	12258.8	15444.4	1012.32	28566.8	12810.2	25084.4	27446.7	28282.5	8493.02	10006.6	23623.6	4380.86	20806.1	1808.04	5140.99	19594.4	30333.2	10311.3	20994.2	19791.3	7816.56	7208.39	10829.2	9788.86	12556.6	6788.6	13877.2	5984.93
79	KYSE-410	Afat + 849 0.1	24	24100.8	277.55	10927.1	15275.4	959.105	28282.5	12797.4	21611.9	23623.6	24587.7	6179.55	8111.19	19015.3	3294.47	17034.6	2323.89	4642.46	15677.8	28282.5	9740.04	15898.8	17378.7	5345.44	4870.74	8760.43	9818.27	11025.9	7339.31	11672.6	4455.97
80	KYSE-410	Afat + 849 0.1	24	24834.8	249.136	10970.9	17378.7	1023.52	31571.2	13835.6	23623.6	29732.6	27446.7	7122.4	9452.18	18694.8	3381.25	19399.5	2266.52	4416.04	16814.5	26903.2	10208.7	16285	19771.6	5761.77	4759.99	9099.73	9136.2	10742.9	6594.56	15962.5	5372.24
81	KYSE-410	Afat + 849 0.3	24	23861	250.135	10840	16432.2	1002.25	30333.2	13629.6	23623.6	26903.2	26370.5	7002.34	8769.2	18807.3	3644.59	19302.7	3258.43	4841.6	13863.3	27173.6	10290.7	16026.5	18863.8	5802.25	4633.19	9662.42	8552.68	11556.5	7030.41	11373	4550.54
82	KYSE-410	Afat + 849 0.3	24	26903.2	232.061	11464.4	17448.3	1066.35	30946	14242.7	24100.8	28566.8	26635.5	6680.85	8078.81	17818.6	3181.15	19477.2	2499.88	4359.01	14883.4	26635.5	10290.7	16966.6	19129.8	5831.33	4121.62	9537.63	8821.97	11430	6822.63	12939	4541.44
83	KYSE-410	Afat + 849 0.9	24	25084.4	260.343	11114.4	15724.9	882.713	28566.8	12848.7	19283.4	22471.4	25336.5	5636.4	5034.15	14617.9	2889.97	18361.3	2612.34	5029.12	13548.1	29436.8	10036.7	18087.9	17102.8	3987.82	5625.14	9887.24	9255.75	13821.8	7150.95	12258.8	5693.04
84	KYSE-410	Afat + 849 0.9	24	22925.4	249.885	11498.8	16106.9	978.48	32532.7	13821.8	20373.7	25336.5	26635.5	5642.03	5161.59	14883.4	2601.91	20353.3	2291.59	4712.62	15290.7	25848.3	10026.6	17223	18977.3	4311.32	5475.29	10178.2	8804.34	13440.1	7058.59	13548.1	5409.97
85	KYSE-410	Afat + 849 2.7	24	24587.7	243.228	11441.5	16564.2	953.367	32209	13932.8	21938.5	23623.6	27722.5	6063.24	2342.56	9710.86	1872.44	19692.6	725.601	4394.02	14228.5	29143.9	9108.83	18087.9	19072.4	3371.12	4619.31	10764.4	7816.56	11081.1	6601.16	11660.9	4372.11
86	KYSE-410	Afat + 849 2.7	24	25336.5	241.532	13670.6	18178.6	1050.48	34200.6	14750	23861	27173.6	30333.2	5831.33	2333.21	9710.86	2024.34	20785.3	869.571	4281.25	14972.9	27446.7	9090.63	17274.7	19633.7	3601.12	4514.28	10938	8046.56	12848.7	7346.66	12900.2	5377.61
87	KYSE-410	Afat + 849 8.1	24	26635.5	334.287	12531.5	15275.4	943.881	30946	14400.2	20251.8	20496.3	25084.4	5255.34	1682.44	7942.63	1606.8	19053.4	651.971	5105.12	14400.2	31888.5	9209.59	18087.9	17257.5	2782.21	6483.4	10981.9	10168	12619.5	6191.92	11452.9	5750.26
88	KYSE-410	Afat + 849 8.1	24	20973.2	226.558	13346.4	13095.2	856.625	28566.8	14214.3	19516.2	18453.3	22471.4	4628.55	1367.86	6561.66	1389.92	17890	642.907	4302.71	11361.7	26903.2	7487.57	14143.4	14898.3	2581.17	5591.48	10219	7966.49	19516.2	6161.03	10614.8	4994.04
89	KYSE-410	Afat + 849 24	24	24834.8	251.137	12733.6	15946.6	940.113	35596.4	14458	19360.7	20578.5	28853.9	4416.04	1062.1	5388.38	1395.49	21807.3	520.089	4559.65	12771.9	31257.1	9566.29	18324.6	17553.3	2630.69	5229.13	10992.8	8569.8	11707.7	7172.43	11626	5140.99
90	KYSE-410	Afat + 849 24	24	27173.6	256.211	13226.8	16123	1000.24	34544.4	14779.6	19930.4	21311.5	28001.1	4447.07	946.717	5239.6	1584.46	20353.3	558.917	4568.77	12100.5	30638.1	9036.26	18160.4	17274.7	2633.32	4433.75	10949	8664.59	11860.9	7101.06	11766.4	5265.86
91	KYSE-410	Afat + 849 73	24	25848.3	353.541	11487.3	16680.6	1105.44	31257.1	14705.8	16383	19496.7	25848.3	3633.68	1330.09	6285.5	1714.71	20910.4	1537.63	5120.46	10710.7	30031.4	11719.4	19653.3	16848.2	2824.26	6634.25	10796.7	9867.48	15199.2	6561.66	12136.8	5664.65
92	KYSE-410	Afat + 849 73	24	25336.5	399.015	10949	14588.7	1047.33	28853.9	14314.1	14314.1	18379.7	23155.8	3644.59	900.545	4783.84	1351.54	19477.2	1334.08	4793.42	10949	32209	11754.6	19148.9	15063	2560.61	5990.92	10850.9	9376.86	13670.6	6680.85	13213.6	5563.59
93	KYSE-410	RMC	24	26635.5	38561.1	15382.7	28566.8	34891.6	18977.3	24587.7	29143.9	22925.4	23861	10219	26370.5	33189.9	5135.85	18051.8	11968.1	10097.1	21057.2	29436.8	9027.22	20292.4	20110.6	7998.43	10551.3	11475.8	12887.3	13134.5	7259.02	12632.1	5308.16
94	KYSE-410	RMC	24	25591.1	37049.1	15599.6	25336.5	34200.6	19594.4	25848.3	28566.8	23623.6	22925.4	12234.3	24100.8	31257.1	5860.56	18269.7	11339	10636	19990.2	27446.7	8324.85	18996.3	20681.6	9330.09	11036.9	11418.6	10614.8	15184	5497.23	12234.3	4600.87
95	KYSE-410	RMC + 849 0.1	24	27446.7	50011.1	19457.7	31888.5	47572	24100.8	30333.2	34200.6	31257.1	28566.8	14764.8	35242.2	32859.6	6721.05	20723	16714	12052.2	20312.7	26370.5	9054.35	20414.5	23155.8	9461.63	10467.2	12258.8	10280.5	12619.5	6727.78	13480.5	4803.02
96	KYSE-410	RMC + 849 0.1	24	28282.5	52052.1	19129.8	28001.1	50011.1	20030.3	28566.8	30333.2	23388.5	25084.4	11778.1	21982.5	30333.2	5808.05	17535.8	9209.59	9633.49	20050.3	29436.8	9063.41	21461.2	19322	7237.28	8901.72	10775.2	9595.02	11731.1	6463.98	12720.9	5079.66
97	KYSE-410	RMC + 849 0.3	24	28566.8	45251.9	16614	29143.9	47572	19850.8	29436.8	30031.4	27722.5	25591.1	14661.8	24587.7	31571.2	5967	20090.5	17413.5	16236.2	19910.5	28853.9	8664.59	19535.7	19418.9	7958.54	12456.5	12644.8	11944.2	13359.7	5558.04	11992.1	4989.05
98	KYSE-410	RMC + 849 0.3	24	26370.5	48533	17034.6	32209	50011.1	22925.4	33189.9	31571.2	31571.2	26635.5	14661.8	30638.1	29143.9	5943.18	21611.9	19496.7	14913.2	19341.3	23861	8209.11	18977.3	21396.9	8647.28	12657.4	13629.6	11395.8	14115.1	5949.13	12797.4	5388.38
99	KYSE-410	RMC+ 849 0.9	24	29143.9	56954	19225.6	34891.6	60475.9	26108.1	39735.5	31571.2	33523.4	30333.2	15724.9	28566.8	29436.8	4703.21	22697.3	19692.6	16074.7	19283.4	25336.5	8804.34	19633.7	20292.4	6918.82	11059	12295.6	9996.6	12431.6	6136.44	12431.6	4856.14
100	KYSE-410	RMC+ 849 0.9	24	28282.5	56954	19673	34544.4	59278.4	25591.1	38177.4	32532.7	35954.1	31571.2	15599.6	25848.3	27173.6	4880.49	22697.3	20578.5	17000.5	19496.7	25336.5	9072.47	20785.3	20070.4	6700.92	10753.6	12581.7	9614.23	13386.5	6272.94	12848.7	5458.88
101	KYSE-410	RMC + 849 2.7	24	29732.6	58688.5	16333.9	32209	61697.6	20764.5	30946	24587.7	27722.5	29436.8	9575.85	23623.6	28282.5	3428.92	21184	20847.7	15321.3	18713.5	28566.8	9818.27	16481.6	17925.9	5693.04	11568	11498.8	12531.5	12784.6	5990.92	12357.3	6788.6
102	KYSE-410	RMC + 849 2.7	24	30333.2	59278.4	17413.5	37049.1	63576.6	24343	39340.1	29732.6	33523.4	34200.6	12444.1	28001.1	26370.5	4003.8	22697.3	22471.4	17553.3	19970.3	25084.4	9509.06	17908	19950.3	6266.67	11350.3	13279.8	11579.6	12295.6	6014.93	13253.3	5925.38
103	KYSE-410	RMC + 849 8.1	24	26108.1	58688.5	17292	31571.2	63576.6	23155.8	35242.2	22697.3	25591.1	28282.5	8484.53	21982.5	25591.1	2499.88	21547.2	15444.4	9926.87	17240.2	24100.8	7942.63	17309.3	18288	4319.96	9367.49	11003.8	10742.9	14647.1	6167.2	12481.5	5377.61
104	KYSE-410	RMC + 849 8.1	24	28853.9	61083.7	17836.5	31571.2	64215.5	22247.8	35954.1	21850.9	25084.4	27446.7	8804.34	18882.7	26903.2	2581.17	20931.3	12469	9877.35	17171.4	26108.1	7871.47	18826.1	16203.8	4225.95	8708.02	11103.3	9986.6	14928.1	6210.52	13697.9	6136.44
105	KYSE-410	RMC + 849 24	24	32859.6	58688.5	16026.5	29436.8	61697.6	19322	28566.8	17765.3	20050.3	26370.5	8527.06	16481.6	25848.3	2333.21	19970.3	13507.5	9956.69	17120	27722.5	7707.89	11872.7	13835.6	3721.94	10056.8	11081.1	11980.1	12344.9	4496.26	11778.1	6856.83
106	KYSE-410	RMC + 849 24	24	29732.6	62317.6	17361.3	31571.2	68871.7	21763.7	36315.5	18958.4	25591.1	30638.1	9209.59	20251.8	25336.5	2342.56	22697.3	12320.3	10540.7	17997.7	24587.7	7570.39	12173.3	15214.4	3901.05	10818.4	11170.1	11872.7	13373.1	7244.51	13602.4	6291.78
107	KYSE-410	RMC + 849 73	24	30946	65512.8	17051.6	30638.1	68871.7	19970.3	31257.1	19692.6	23155.8	28566.8	10178.2	17120	25591.1	2581.17	21763.7	15615.2	12823.1	17800.8	28001.1	8160	13108.3	14299.8	3681.22	9537.63	10981.9	11556.5	12088.4	5569.16	13399.9	6081.46
108	KYSE-410	RMC + 849 73	24	28282.5	58688.5	16714	30946	64215.5	21184	36315.5	18676.1	23623.6	29436.8	8250.26	19910.5	26903.2	2319.25	23155.8	13588.8	10861.7	18882.7	26370.5	8433.78	13960.7	14987.9	3854.51	9191.19	11475.8	10147.7	11992.1	6093.64	14913.2	6105.83
109	KYSE-410	Vistusertib	24	27722.5	5796.44	14016.6	24343	6946.55	16932.7	17034.6	37049.1	18958.4	16383	4255.64	101.494	345.848	48050.1	14868.5	1514.74	40945.6	1679.08	7746.53	1795.43	16058.6	23155.8	18958.4	13253.3	14868.5	10056.8	13108.3	6891.2	11327.6	4846.44
110	KYSE-410	Vistusertib	24	29436.8	8813.14	15428.9	30946	10311.3	19574.8	19791.3	45251.9	26108.1	19477.2	4577.92	108.853	311.999	43477.6	17430.9	1508.69	38948.7	2547.84	7237.28	1749.35	16465.1	25848.3	22471.4	15017.9	16268.7	9769.3	11731.1	7136.66	12632.1	5382.99
111	KYSE-410	Vistusertib + 849 100nM	24	28282.5	15063	16514.6	34200.6	17188.6	22247.8	22925.4	40134.9	23155.8	19225.6	4731.51	80.4793	289.166	37421.5	17500.8	1392.7	37797.6	1941.08	5161.59	1478.82	16301.3	23623.6	13003.8	8830.8	15630.8	8467.58	10311.3	6587.97	11649.3	5009.04
112	KYSE-410	Vistusertib + 849 100nM	24	28001.1	14972.9	16203.8	33523.4	16547.7	21894.7	22471.4	38561.1	23388.5	19129.8	4614.69	88.3229	312.936	31888.5	17396.1	1308.98	34544.4	2335.54	5480.77	1539.17	17274.7	21960.5	12136.8	8217.32	14750	8786.75	10363	7540.17	13739.1	5653.33
115	KYSE-410	Everolimus	24	31888.5	5140.99	14661.8	26635.5	6380.49	18160.4	17292	45706.7	26370.5	25336.5	4324.27	200.537	439.659	42616.6	16531.1	30333.2	49020.8	14385.8	38948.7	7532.63	21872.8	23155.8	16139.1	13174	13821.8	10938	12004.1	6768.26	12295.6	5447.98
116	KYSE-410	Everolimus	24	31257.1	6489.88	14750	29732.6	7677.12	17676.6	18124.1	46630	29436.8	26370.5	4289.82	116.048	322.789	35242.2	16881.9	31888.5	44355.8	14044.7	37797.6	7555.27	21311.5	23155.8	16697.3	13082.1	13670.6	10137.5	12028.1	7310.01	12419.2	4582.5
117	KYSE-410	Everolimus + 849 100nM	24	29732.6	8769.2	14545	32209	10488.1	19034.3	19360.7	42616.6	26903.2	24587.7	4007.81	112.168	317.348	35242.2	18863.8	26108.1	52052.1	10764.4	37421.5	6694.22	20973.2	21226.4	8982.2	8070.74	13821.8	9117.95	10625.4	7661.78	12848.7	5260.6
118	KYSE-410	Everolimus + 849 100nM	24	27173.6	11003.8	14779.6	29436.8	11908.4	19496.7	20110.6	40538.2	28282.5	24587.7	4056.19	115.816	330.961	22697.3	19072.4	22697.3	30333.2	11373	34891.6	6687.53	20681.6	20394.1	9566.29	7502.57	12861.6	8630	12197.7	7086.88	12848.7	5409.97
121	KYSE-410	Vehicle	72	28282.5	17085.8	15506.3	37797.6	17292	25848.3	30333.2	31257.1	33860.4	33523.4	12556.6	23861	28566.8	19015.3	21396.9	2892.86	4345.95	23388.5	29436.8	8892.83	20475.8	25591.1	17017.5	5738.77	18015.7	13521	5750.26	6918.82	12406.8	3816.16
122	KYSE-410	Vehicle	72	24834.8	18142.3	15275.4	33523.4	18324.6	23623.6	27722.5	27722.5	33189.9	31888.5	10710.7	19831	27446.7	15321.3	21184	2895.75	3912.77	24834.8	29732.6	9209.59	19264.1	24343	16252.5	4769.52	18324.6	12320.3	6105.83	7317.32	13548.1	4438.18
123	KYSE-410	849 0.1nM	72	26903.2	15787.9	9867.48	31571.2	17223	17729.8	26903.2	21247.6	32209	31571.2	8875.05	19225.6	26903.2	12307.9	21611.9	2609.72	3418.65	24587.7	28566.8	9828.09	21162.8	23155.8	20373.7	1260.17	10786	12382	3181.15	5508.24	11591.2	939.173
124	KYSE-410	849 0.1nM	72	26635.5	20353.3	10249.7	31257.1	21720.2	20394.1	29732.6	21036.2	27446.7	32859.6	7918.84	19148.9	26108.1	9633.49	22471.4	2293.88	3924.52	26108.1	28853.9	10097.1	21829.1	23388.5	19950.3	2594.11	11147.8	12173.3	2807.36	4909.85	10425.4	1009.29
125	KYSE-410	849 0.3nM	72	27722.5	10775.2	9847.76	29143.9	12149	17712	28566.8	25336.5	25591.1	28853.9	13003.8	24587.7	28001.1	18269.7	19457.7	3190.71	3688.59	24834.8	29143.9	7966.49	21461.2	23155.8	18882.7	812.406	10332	10861.7	2494.89	4670.4	10404.6	2056.99
126	KYSE-410	849 0.3nM	72	24834.8	13766.6	9857.62	28853.9	13467	18361.3	25848.3	26370.5	29436.8	29143.9	13561.6	22925.4	27446.7	21872.8	20557.9	4460.43	3648.24	25591.1	28001.1	8233.77	21482.6	24587.7	18657.4	1517.77	12295.6	11036.9	2969.06	5110.23	11920.3	1205.92
127	KYSE-410	849 0.9nM	72	27173.6	21547.2	12720.9	34200.6	22925.4	22471.4	33189.9	25336.5	26635.5	32859.6	9701.16	15851.2	25591.1	9652.77	21375.5	2694.59	4324.27	23623.6	30031.4	8821.97	17051.6	23388.5	14285.5	3229.23	9897.13	11872.7	4072.45	5738.77	12644.8	4402.82
128	KYSE-410	849 0.9nM	72	26635.5	27446.7	14632.5	38561.1	33523.4	24587.7	39340.1	22925.4	27173.6	35596.4	7143.8	19457.7	26903.2	6247.89	23623.6	2280.16	3759.35	24343	29143.9	9027.22	18051.8	23623.6	14691.1	2954.25	9311.45	11487.3	4105.16	6310.69	12759.1	4217.51
129	KYSE-410	849 2.7nM	72	26370.5	48533	18142.3	52575.2	56954	36680.5	59278.4	26903.2	33189.9	46166	7376.1	20931.3	21611.9	6210.52	28282.5	2641.23	3916.68	20910.4	22697.3	8821.97	17588.5	25591.1	13821.8	3442.66	9154.49	11203.7	4363.37	7129.52	13670.6	4478.3
130	KYSE-410	849 2.7nM	72	25084.4	34200.6	18751	39340.1	39735.5	24834.8	41772.8	21504.1	25848.3	32532.7	7158.1	16203.8	24100.8	7354	24100.8	2370.84	3405	23861	29143.9	9027.22	17588.5	21960.5	11282.4	2255.21	8578.38	10456.7	3710.79	6457.51	13643.2	3979.85
131	KYSE-410	849 8.1nM	72	26108.1	31257.1	16983.5	48050.1	36315.5	28566.8	45706.7	27722.5	22247.8	34891.6	8341.52	16074.7	25336.5	11125.6	25336.5	3213.13	4411.63	18269.7	27722.5	7577.96	21633.5	18545.8	9218.8	3619.17	12581.7	13095.2	4684.43	6620.99	13602.4	4726.78
132	KYSE-410	849 8.1nM	72	28001.1	37049.1	17961.7	49513.5	43914.5	28566.8	45706.7	27722.5	24587.7	38177.4	9376.86	17413.5	26903.2	12197.7	25591.1	3099.51	4167.2	17925.9	28282.5	7824.38	22471.4	20702.3	10604.1	3558.16	13766.6	13904.9	4675.07	7065.65	13616	5409.97
133	KYSE-410	849 24nM	72	26635.5	41772.8	18751	55270.8	48533	30638.1	50513.7	25084.4	25591.1	42192.6	7746.53	16932.7	26635.5	10137.5	26108.1	3411.82	3453.01	16285	28566.8	7222.82	22697.3	17659	9200.38	2507.4	14129.2	12246.6	3916.68	7215.59	11980.1	4759.99
134	KYSE-410	849 24nM	72	25084.4	48533	20090.5	54176.3	53103.6	30638.1	46630	26903.2	26370.5	38561.1	9099.73	17465.8	27446.7	16139.1	27446.7	3940.25	3812.35	17274.7	29732.6	7585.55	22471.4	19034.3	9452.18	2000.19	14913.2	11860.9	4545.99	6967.42	13069	5802.25
135	KYSE-410	849 73nM	72	29143.9	45706.7	20272.1	58688.5	52575.2	35596.4	54720.8	28566.8	29732.6	43477.6	9691.46	15413.5	22026.5	16171.4	28853.9	4429.31	4204.88	16301.3	25084.4	7608.34	19187.2	20889.5	9490.06	4861	16155.2	13147.7	6741.25	7879.35	12771.9	4473.83
136	KYSE-410	849 73nM	72	28001.1	50011.1	20868.6	56387.3	56954	32532.7	53103.6	27446.7	30031.4	42616.6	9490.06	17818.6	22697.3	17274.7	28566.8	4031.93	4268.43	16268.7	25591.1	7502.57	19890.5	20373.7	9672.09	4536.9	16597.4	12990.8	5843	7824.38	13306.4	4779.06
137	KYSE-410	Vistusertib	72	33523.4	7926.76	16252.5	37049.1	9395.63	20050.3	19732.1	35954.1	18398	18379.7	4924.61	288.011	474.851	34891.6	19129.8	1675.72	30638.1	1937.2	14328.4	2497.39	22471.4	22247.8	14764.8	14913.2	14705.8	9818.27	13279.8	6694.22	11614.4	4693.81
138	KYSE-410	Vistusertib	72	33189.9	7793.15	16465.1	37049.1	9490.06	19438.3	19614	38948.7	20130.7	17344	4788.63	105.214	443.634	49020.8	19791.3	1629.45	35954.1	2098.55	12644.8	2303.07	22925.4	22697.3	16580.8	14824	15819.5	8604.15	14101	6988.35	12173.3	4679.75
139	KYSE-410	Vistusertib + 849 100nM	72	12964.9	5524.79	17570.9	10786	5744.51	11872.7	15002.9	19438.3	3398.19	4416.04	2699.98	37.4497	106.378	10127.4	4514.28	495.219	6795.39	493.736	1433.68	771.24	7009.35	6680.85	3388.02	5350.79	6179.55	2793.36	59278.4	6185.73	6822.63	3519.24
140	KYSE-410	Vistusertib + 849 100nM	72	11660.9	3219.56	14779.6	7871.47	3547.5	10259.9	13213.6	16898.8	2751.77	3411.82	2392.28	30.815	108.31	7480.09	3364.38	412.403	5329.43	323.436	990.292	686.77	6614.37	5334.76	2678.47	4040	4717.34	2136.66	62317.6	5802.25	7631.19	3637.31
141	KYSE-410	Everolimus	72	25848.3	14342.8	16090.8	24343	15630.8	16915.7	19418.9	27722.5	15033	20150.8	3751.83	220.302	405.046	12544	16383	10301	11556.5	10137.5	32859.6	6568.23	16448.7	11849	7480.09	10657.3	10137.5	9191.19	25591.1	5552.48	9867.48	4722.06
142	KYSE-410	Everolimus	72	25591.1	17800.8	16983.5	25848.3	18379.7	16848.2	19477.2	26903.2	14691.1	19148.9	3477.26	158.222	413.642	14603.3	16301.3	10796.7	12964.9	8400.11	30031.4	5813.86	17188.6	12100.5	6607.76	9575.85	10425.4	7879.35	24343	5761.77	9996.6	4774.29
143	KYSE-410	Everolimus + 849 100nM	72	18676.1	15063	16333.9	23861	15819.5	15413.5	16814.5	23623.6	9769.3	13507.5	3640.95	72.8935	276.995	32209	13147.7	8442.22	14458	3124.41	20910.4	2798.95	11707.7	11259.9	4909.85	7037.44	9480.57	6198.11	37797.6	6431.74	9348.77	4880.49
144	KYSE-410	Everolimus + 849 100nM	72	17800.8	17137.1	16514.6	22697.3	17800.8	14913.2	15851.2	21504.1	10477.7	13616	3515.72	70.9518	297.377	28566.8	13877.2	8086.9	13507.5	3515.72	22247.8	3029.04	11475.8	10872.6	5029.12	6535.47	9200.38	5475.29	37797.6	6087.54	9099.73	5120.46
145	H358	Vehicle	6	17465.8	263.75	11556.5	867.833	498.199	20231.6	13213.6	19870.7	23861	14414.6	72402.8	24587.7	22471.4	16647.2	20373.7	4545.99	6721.05	34544.4	33860.4	25848.3	17205.8	22026.5	31571.2	4003.8	42616.6	11591.2	8006.43	8070.74	12124.7	3812.35
146	H358	Vehicle	6	16898.8	252.396	11487.3	877.432	506.235	20889.5	13399.9	20394.1	27173.6	14972.9	64215.5	25084.4	23388.5	14214.3	20826.9	4559.65	5546.93	34544.4	32532.7	26108.1	17535.8	21036.2	31888.5	3736.86	40945.6	11305	7079.79	8316.53	12493.9	4482.79
147	H358	849 0.1nM	6	17518.3	260.343	7266.28	865.234	525.316	13293.1	11614.4	14185.9	18361.3	12222.1	49513.5	18142.3	22471.4	10668	16564.2	2392.28	4350.3	40945.6	38948.7	25591.1	19535.7	16498.1	26370.5	563.969	17943.8	10764.4	4138.13	7002.34	10938	2298.47
148	H358	849 0.1nM	6	17623.7	220.523	6815.81	915.985	456.231	14285.5	11475.8	14256.9	19206.4	12344.9	53103.6	20931.3	23623.6	9681.77	18361.3	2140.94	4487.27	40945.6	37049.1	25336.5	20455.3	17000.5	28566.8	1053.63	17500.8	10477.7	3774.41	7093.96	12112.6	2581.17
149	H358	849 0.3nM	6	17553.3	241.29	7179.61	927.971	467.313	17137.1	12657.4	14809.1	21461.2	14058.7	48533	25848.3	26903.2	8242.02	21120.5	2492.4	3558.16	37421.5	32532.7	25084.4	20110.6	19380.1	31257.1	953.367	19283.4	10456.7	4179.72	7562.82	12369.6	1948.86
150	H358	849 0.3nM	6	18398	233.224	7608.34	887.138	470.596	16042.5	12004.1	15153.7	23155.8	14342.8	52052.1	22925.4	25336.5	9461.63	20292.4	2519.96	4023.87	40538.2	34891.6	27173.6	21268.9	17890	31257.1	669.814	19910.5	10036.7	3622.79	5848.85	12088.4	765.095
151	H358	849 0.9nM	6	17137.1	381.076	130614	1070.63	669.145	17694.3	13602.4	14868.5	34200.6	13160.8	35954.1	22697.3	26635.5	5260.6	16481.6	1831.7	3398.19	35596.4	34891.6	22471.4	16106.9	18196.8	24100.8	1626.2	17465.8	8586.96	6496.38	7079.79	11825.3	4040
152	H358	849 0.9nM	6	17518.3	305.21	9604.63	820.571	495.219	17240.2	13121.4	15428.9	22697.3	13042.9	41772.8	25336.5	24343	5854.7	18583	1976.34	3854.51	37421.5	34200.6	24343	18196.8	18583	26903.2	1419.41	18379.7	9471.1	5591.48	6829.46	11684.3	3736.86
153	H358	849 2.7nM	6	17344	235.568	9154.49	821.392	447.197	17068.7	12320.3	14016.6	21162.8	12926.1	21162.8	17378.7	24343	3718.22	19091.5	2721.67	4188.09	37797.6	38948.7	28853.9	19516.2	18051.8	24587.7	1198.71	17223	9154.49	4402.82	7115.28	11742.9	2793.36
154	H358	849 2.7nM	6	18033.7	288.011	124244	920.576	472.482	18751	13056	15787.9	66171.2	14256.9	29143.9	20171	23155.8	5039.18	19712.3	3785.75	5442.54	34200.6	32859.6	27722.5	19322	23155.8	27173.6	1306.36	18269.7	8664.59	4949.29	7918.84	13134.5	3184.34
155	H358	849 8.1nM	6	17085.8	446.75	13974.6	1088.98	800.311	20171	13121.4	13974.6	21311.5	13121.4	25336.5	19399.5	26635.5	1994.2	19516.2	1697.65	3601.12	33860.4	37421.5	28566.8	18545.8	17448.3	23388.5	1782.91	16630.6	6761.5	5399.17	7376.1	11860.9	4204.88
156	H358	849 8.1nM	6	16949.6	318.939	11327.6	908.686	570.778	19751.8	12506.5	13904.9	23861	13904.9	28853.9	23861	26635.5	1906.45	20110.6	2568.3	4614.69	33523.4	33860.4	30333.2	19653.3	19574.8	26635.5	2056.99	21375.5	7502.57	5698.74	8242.02	12076.3	4807.82
157	H358	849 24nM	6	15306	322.144	13213.6	834.64	587.573	17223	12657.4	11696	15444.4	9376.86	19771.6	11766.4	20847.7	1192.73	15002.9	1770.47	4367.74	29143.9	37049.1	23388.5	15851.2	13725.4	16317.6	919.656	9063.41	4416.04	8928.47	7072.72	10604.1	4255.64
158	H358	849 24nM	6	15946.6	306.127	10981.9	818.931	561.157	18269.7	12964.9	12810.2	18124.1	10342.3	21078.3	11789.9	20723	1288.2	15677.8	2090.17	4482.79	29732.6	35596.4	25084.4	15093.2	13904.9	16580.8	832.139	10959.9	5292.26	8725.46	7413.07	11498.8	4619.31
159	H358	849 73nM	6	17925.9	491.273	12682.8	1107.65	807.546	19457.7	12861.6	12271.1	21894.7	11754.6	18863.8	14913.2	21590.3	1132.29	18069.8	1587.63	4011.82	32859.6	37421.5	28282.5	16285	16268.7	19910.5	2284.72	8777.97	6393.26	8086.9	8647.28	12926.1	4060.25
160	H358	849 73nM	6	16881.9	366.134	10938	954.321	587.573	19930.4	12670.1	11742.9	22247.8	11170.1	20010.3	16123	19692.6	1186.78	20050.3	2303.07	5681.67	32209	37049.1	30031.4	16026.5	16481.6	22026.5	2972.03	11684.3	6747.99	7608.34	8242.02	13711.6	4268.43
161	H358	Afatinib	6	17818.6	51.9873	16399.4	719.819	329.64	16797.7	9897.13	16268.7	19341.3	11271.1	13670.6	11214.9	21872.8	2143.08	17606.1	1998.2	4482.79	32532.7	40945.6	33860.4	17257.5	14868.5	18882.7	4803.02	14256.9	6898.09	11170.1	7918.84	11980.1	4656.41
162	H358	Afatinib	6	18398	28.5598	120572	953.367	445.412	21763.7	10625.4	18713.5	25336.5	11192.5	13121.4	9887.24	19168	1848.26	17309.3	2175.47	4827.1	28853.9	37049.1	31257.1	18490.3	15108.3	26370.5	4469.36	12506.5	5475.29	13279.8	8612.76	12797.4	5458.88
163	H358	Afat + 849 0.1	6	16514.6	103.441	11036.9	980.439	472.955	16714	10850.9	16074.7	17326.6	10178.2	10614.8	7555.27	19594.4	1467.04	14764.8	1608.41	3626.42	29436.8	40945.6	25084.4	15740.6	13629.6	17570.9	3111.94	10981.9	6548.56	10786	8484.53	12874.5	4376.48
164	H358	Afat + 849 0.1	6	17085.8	52.2479	11327.6	775.106	354.249	17890	10488.1	16481.6	21332.8	10249.7	13226.8	9788.86	19516.2	1546.89	17137.1	1723.31	3812.35	31888.5	39735.5	28282.5	16448.7	14750	20619.7	3105.72	11872.7	7593.14	9246.5	7950.58	14256.9	4175.54
165	H358	Afat + 849 0.3	6	17051.6	72.6025	11766.4	851.501	370.925	20785.3	11081.1	17396.1	23861	12064.2	14414.6	13029.9	20333	1747.6	20292.4	1962.55	4505.26	31257.1	36315.5	30946	17396.1	17606.1	25848.3	4019.85	12848.7	7950.58	8184.52	8638.64	13306.4	3789.54
166	H358	Afat + 849 0.3	6	16865.1	28.8468	11837.2	813.219	335.627	24587.7	10905.3	17961.7	26370.5	11637.6	15444.4	12810.2	19751.8	1702.75	20619.7	2036.52	4817.45	32209	35954.1	31888.5	17051.6	17518.3	25848.3	3337.58	12951.9	7150.95	7887.22	8070.74	11789.9	3401.6
167	H358	Afat + 849 0.9	6	17344	121.51	11521.8	965.842	461.739	20353.3	11203.7	15459.8	21720.2	12431.6	10425.4	13160.8	22925.4	1401.08	20272.1	1652.43	4389.63	32209	37797.6	33523.4	15851.2	17085.8	23623.6	4851.29	10097.1	6939.61	9528.09	9614.23	12887.3	5182.28
168	H358	Afat + 849 0.9	6	17872.2	63.3072	11614.4	803.518	366.134	20681.6	11059	15630.8	22471.4	12076.3	11521.8	11407.2	21418.3	1280.49	19732.1	1758.12	4605.47	32209	38177.4	33189.9	15756.4	18033.7	23623.6	4619.31	11025.9	7390.86	8955.3	9191.19	13134.5	4831.92
169	H358	Afat + 849 2.7	6	15962.5	60.3403	12369.6	692.979	407.483	18124.1	11498.8	14414.6	17034.6	9662.42	7510.07	3655.55	11649.3	1139.11	16301.3	2609.72	6647.53	23388.5	36680.5	27722.5	12733.6	14143.4	17570.9	3770.64	7405.66	5608.28	13346.4	8621.38	10959.9	4345.95
170	H358	Afat + 849 2.7	6	16026.5	44.345	12913.1	709.812	402.22	20910.4	12493.9	15914.7	21807.3	11568	8176.34	4109.27	12406.8	1154.01	18033.7	2681.15	6081.46	24834.8	33523.4	30638.1	13174	15260.2	18769.7	3540.42	7887.22	5329.43	12951.9	8510.02	10732.2	4350.3
171	H358	Afat + 849 8.1	6	16747.4	108.962	12531.5	810.783	465.448	17570.9	11350.3	14002.6	15568.4	9145.35	7769.8	4433.75	15153.7	1030.71	15835.4	1627.82	4909.85	24100.8	40134.9	31571.2	14256.9	13319.7	15321.3	4105.16	7346.66	5884.05	12682.8	8383.33	11696	5125.58
172	H358	Afat + 849 8.1	6	16399.4	62.2401	12136.8	703.452	382.221	18178.6	10850.9	13616	17818.6	9643.12	8225.55	5146.13	13616	967.775	17623.7	1756.36	5208.25	24587.7	37421.5	31888.5	14299.8	13849.4	17694.3	4712.62	7855.74	5767.53	12913.1	8299.91	11789.9	4774.29
173	H358	Afat + 849 24	6	17465.8	51.3672	12848.7	792.348	429.663	18977.3	10818.4	12964.9	18142.3	9643.12	7376.1	5790.65	13629.6	892.476	17908	1660.71	4614.69	24100.8	34891.6	31571.2	14574.1	14574.1	18471.8	4354.65	7044.48	5442.54	13016.9	8242.02	11464.4	4964.16
174	H358	Afat + 849 24	6	18694.8	53.0906	12531.5	807.546	354.603	20414.5	11048	13453.6	22697.3	11181.3	8821.97	6063.24	13725.4	890.693	19187.2	1660.71	4846.44	25336.5	34200.6	34200.6	15275.4	15506.3	20537.3	4380.86	7855.74	5602.68	11025.9	8973.22	12746.3	4944.34
175	H358	Afat + 849 73	6	17154.2	99.8831	12720.9	782.896	462.201	16220	10572.4	13602.4	13588.8	9311.45	7051.53	3190.71	13399.9	1009.29	13877.2	1211.97	3710.79	22247.8	39340.1	30031.4	15336.6	12185.5	13333	4167.2	9009.19	5208.25	15835.4	7942.63	10883.5	4895.15
176	H358	Afat + 849 73	6	13399.9	33.0493	13780.4	733.627	547.301	14086.9	11327.6	14720.6	9376.86	6099.73	5837.16	3808.54	9643.12	724.151	10456.7	848.101	2718.95	14030.7	27446.7	17085.8	10127.4	8493.02	10321.7	3648.24	6451.06	3242.17	30638.1	7093.96	8425.34	3770.64
177	H358	RMC	6	15199.2	318.939	14242.7	820.571	627.034	16220	12848.7	16564.2	12185.5	8655.93	13697.9	12100.5	22247.8	1594	13821.8	1723.31	4505.26	24587.7	33523.4	19457.7	13293.1	10625.4	13918.9	5497.23	7832.21	4092.86	25591.1	7420.49	9643.12	4150.57
178	H358	RMC	6	13174	240.808	14086.9	649.368	531.658	14285.5	12431.6	15851.2	9054.35	6355.02	11860.9	7244.51	16042.5	1202.31	10657.3	1301.15	4064.31	19831	30638.1	15459.8	11407.2	8769.2	10519.6	4793.42	7136.66	3862.23	30946	6904.99	9045.29	3662.86
179	H358	RMC + 849 0.1	6	14285.5	264.542	15382.7	934.489	681.98	17240.2	13656.9	17292	12271.1	7998.43	15184	11059	17836.5	1216.82	12581.7	1702.75	4491.76	20455.3	28566.8	16814.5	11556.5	9828.09	12720.9	3956.04	8655.93	3093.32	30031.4	7108.17	9090.63	4146.42
180	H358	RMC + 849 0.1	6	13293.1	188.859	14632.5	639.7	539.693	14764.8	12606.9	16317.6	9547.17	6836.29	10992.8	7165.26	15914.7	1170.28	10625.4	1395.49	3850.66	18882.7	28566.8	15108.3	10970.9	8383.33	10249.7	3699.67	7023.38	3071.74	32209	8349.86	8937.4	4035.96
181	H358	RMC + 849 0.3	6	20660.9	469.656	12149	918.737	687.457	18215	12088.4	12926.1	18160.4	11521.8	16597.4	14987.9	27173.6	1543.8	18601.6	2394.67	6483.4	34200.6	38561.1	29143.9	18251.5	13095.2	18508.8	6260.4	9779.07	6310.69	13849.4	7259.02	10883.5	4703.21
182	H358	RMC + 849 0.3	6	17570.9	367.602	11316.3	928.899	673.845	18583	12209.9	12784.6	19034.3	10689.3	18379.7	18196.8	26370.5	1405.29	20660.9	3364.38	7832.21	31888.5	35242.2	30333.2	18342.9	14824	20516.8	6788.6	12544	6620.99	15244.9	7354	11626	4817.45
183	H358	RMC+ 849 0.9	6	19692.6	387.223	11980.1	992.275	626.407	19322	12835.9	12913.1	18361.3	11271.1	18620.2	15275.4	25591.1	1236.45	19751.8	2447.93	6768.26	32209	36315.5	30946	17961.7	14913.2	19225.6	6291.78	10764.4	5426.23	14928.1	7495.06	10689.3	5064.44
184	H358	RMC+ 849 0.9	6	18863.8	376.531	11956.1	991.283	592.292	19771.6	12419.2	13016.9	20578.5	11533.4	16915.7	16350.3	25336.5	1246.38	21015.2	2702.68	6960.45	32859.6	35954.1	32859.6	18977.3	14972.9	20640.3	6045.08	10488.1	5546.93	14171.7	7982.44	11684.3	5286.97
185	H358	RMC + 849 2.7	6	22925.4	353.188	113550	959.105	604.257	15615.2	10927.1	10076.9	19751.8	10509.1	9730.3	8561.24	20434.9	1066.35	17836.5	2264.25	6849.97	32532.7	42192.6	31257.1	17171.4	12506.5	17465.8	7172.43	8442.22	6057.18	13932.8	7442.78	12431.6	6317
186	H358	RMC + 849 2.7	6	22697.3	421.155	10087	890.693	559.476	17606.1	11293.7	10625.4	19438.3	12606.9	10561.8	10046.7	20211.3	1122.15	20723	2841.25	7547.71	33189.9	39340.1	34544.4	16747.4	14472.4	20702.3	7016.36	11070.1	6412.47	11719.4	7638.83	12720.9	5808.05
187	H358	RMC + 849 8.1	6	21057.2	475.326	9828.09	853.205	597.05	16597.4	11591.2	10604.1	15199.2	11092.2	11464.4	10872.6	21525.6	1062.1	18251.5	1322.13	4914.77	29732.6	37049.1	31257.1	14200	12088.4	16949.6	6039.04	7108.17	5156.43	15962.5	7288.11	11510.3	5907.63
188	H358	RMC + 849 8.1	6	22925.4	474.376	9916.94	1027.62	595.261	17413.5	11719.4	10938	18453.3	12040.1	14385.8	11896.5	22697.3	1030.71	19831	1770.47	5308.16	32859.6	40134.9	35596.4	15819.5	13279.8	20868.6	5675.99	8358.21	5608.28	12283.4	7244.51	11968.1	5361.5
189	H358	RMC + 849 24	6	26903.2	435.285	10107.2	1165.61	613.39	15867.1	11147.8	9218.8	18069.8	13656.9	13904.9	15677.8	23155.8	1042.11	20475.8	1358.31	5115.34	32532.7	37797.6	35242.2	14414.6	11475.8	20826.9	7638.83	7832.21	6574.81	11707.7	7158.1	12357.3	4518.79
190	H358	RMC + 849 24	6	25084.4	441.421	8892.83	1013.33	542.398	15229.7	10796.7	9027.22	17344	12481.5	12519	13333	22471.4	1085.72	21205.2	1669.03	5409.97	33523.4	40538.2	38177.4	13780.4	11568	20010.3	8070.74	8316.53	6761.5	10509.1	6741.25	12720.9	4944.34
191	H358	RMC + 849 73	6	24100.8	476.277	9643.12	1115.44	600.042	16614	11498.8	9172.82	17378.7	12695.5	12733.6	14328.4	22925.4	1164.45	22925.4	1467.04	5208.25	34200.6	38561.1	38177.4	14044.7	12519	20578.5	7420.49	7165.26	6528.94	10861.7	7051.53	12295.6	5084.75
192	H358	RMC + 849 73	6	25848.3	449.889	9018.2	915.985	522.696	14838.8	11181.3	9163.65	16448.7	11980.1	12594.3	10657.3	22247.8	1053.63	20952.2	1723.31	5361.5	35954.1	42616.6	40538.2	15153.7	11305	17085.8	6063.24	6412.47	6489.88	8518.54	6654.18	12100.5	5854.7
193	H358	Vistusertib	6	16285	238.889	13849.4	977.502	578.825	19264.1	15428.9	28001.1	21938.5	13306.4	10321.7	188.859	970.683	25084.4	18901.6	623.906	13226.8	2614.95	15677.8	4605.47	15599.6	18215	25084.4	5265.86	30638.1	10883.5	10076.9	7769.8	11968.1	4665.73
194	H358	Vistusertib	6	16865.1	282.591	13266.5	875.679	561.718	17017.5	14357.1	24343	19751.8	12695.5	9302.14	141.883	858.34	19910.5	17137.1	483.475	9518.57	2504.89	15063	4367.74	16465.1	16680.6	22925.4	4076.52	28282.5	10927.1	8119.31	6836.29	12271.1	3956.04
195	H358	Vistusertib + 849 100nM	6	16580.8	436.156	13213.6	958.146	670.484	17017.5	14129.2	14574.1	16865.1	10540.7	3659.2	60.9467	345.848	1095.54	17137.1	211.876	4827.1	1692.56	6304.38	5100.02	14898.3	13213.6	15994.5	2226.09	8866.19	5497.23	7517.58	6620.99	11339	3439.22
196	H358	Vistusertib + 849 100nM	6	17292	450.339	14705.8	1036.91	730.698	20070.4	15290.7	15756.4	21676.9	12052.2	4424.89	86.6606	404.641	1238.93	21872.8	232.061	5356.15	1906.45	7661.78	5831.33	15693.5	15568.4	19751.8	2305.38	10239.4	5366.87	7777.57	6795.39	12619.5	4311.32
197	H358	Everolimus	6	17800.8	249.136	14342.8	893.369	519.05	17396.1	14735.3	24834.8	18882.7	14115.1	7990.43	152.933	975.549	10363	16252.5	11025.9	12209.9	20557.9	43914.5	14868.5	15709.2	16915.7	23155.8	4974.1	23861	10927.1	8160	8030.48	11114.4	4328.6
198	H358	Everolimus	6	14242.7	194.805	11475.8	880.069	445.858	14242.7	12124.7	20312.7	17641.3	12444.1	7086.88	150.355	1013.33	12939	17000.5	11672.6	14058.7	19930.4	43477.6	14443.5	15153.7	16932.7	23623.6	4861	24587.7	10488.1	8501.52	7413.07	11036.9	4376.48
199	H358	Everolimus + 849 100nM	6	17943.8	456.231	14185.9	879.189	692.979	18490.3	14647.1	15229.7	19129.8	11441.5	3659.2	71.1649	598.843	1103.23	18416.5	3508.7	6291.78	18106	44801.6	16983.5	14750	15398.1	17483.3	2638.59	9072.47	5208.25	7942.63	8561.24	11980.1	4242.89
200	H358	Everolimus + 849 100nM	6	16764.2	443.191	15336.6	924.266	684.029	18920.5	14764.8	16074.7	19206.4	11684.3	3889.36	100.384	645.484	1057.86	19692.6	3688.59	6898.09	18269.7	42616.6	17205.8	15851.2	16647.2	18324.6	2296.17	9302.14	5750.26	7495.06	7129.52	11602.8	4545.99
201	H358	Vehicle	24	15898.8	291.78	13108.3	879.189	603.05	19535.7	15382.7	21676.9	21057.2	13200.4	61697.6	18527.3	21763.7	10229.2	18471.8	3446.11	5135.85	31571.2	31571.2	18324.6	15306	16399.4	26903.2	3297.76	25591.1	10425.4	10076.9	7435.34	12695.5	4610.08
202	H358	Vehicle	24	17676.6	323.112	14143.4	1035.87	577.091	19930.4	15835.4	22697.3	25084.4	14853.6	68186.4	21568.7	21742	13029.9	20090.5	4154.72	5878.16	32532.7	31571.2	19930.4	17326.6	18324.6	29732.6	3087.14	30638.1	9996.6	8742.93	7230.04	11361.7	4628.55
203	H358	849 0.1nM	24	18379.7	241.29	7450.23	786.034	488.823	13121.4	12004.1	14285.5	17606.1	12682.8	56954	16663.9	22471.4	10981.9	19341.3	3029.04	5094.93	42616.6	38561.1	22026.5	20090.5	16597.4	28001.1	316.398	15615.2	11203.7	3547.5	6279.21	11203.7	180.008
204	H358	849 0.1nM	24	17641.3	249.635	7824.38	930.759	500.196	16155.2	13521	17257.5	22026.5	14838.8	64860.9	22247.8	24100.8	13069	21611.9	4234.41	6130.3	36315.5	31257.1	20070.4	17659	17257.5	30031.4	331.292	18958.4	10894.3	4451.52	4841.6	10861.7	63.1808
205	H358	849 0.3nM	24	18807.3	243.228	7570.39	1013.33	508.772	16797.7	13160.8	16564.2	22471.4	14676.5	61697.6	24100.8	26370.5	9798.65	22471.4	3388.02	4870.74	40134.9	35242.2	24587.7	19712.3	19302.7	33189.9	1024.54	17257.5	11591.2	3029.04	4807.82	10509.1	1009.29
206	H358	849 0.3nM	24	19034.3	195	7480.09	879.189	425.813	15662.1	12456.5	15260.2	21829.1	13213.6	54720.8	18844.9	25848.3	9461.63	19341.3	3108.82	4234.41	40134.9	37049.1	24100.8	19712.3	17188.6	28566.8	280.059	15599.6	10229.2	3193.91	3755.59	11407.2	622.037
207	H358	849 0.9nM	24	17000.5	290.035	11430	936.36	565.664	20455.3	15521.8	18694.8	25084.4	14588.7	56954	21184	23155.8	7383.47	20292.4	3384.63	6304.38	32859.6	29732.6	19831	16898.8	18583	27446.7	1587.63	15093.2	8937.4	7863.6	7376.1	11908.4	2966.09
208	H358	849 0.9nM	24	17223	312.936	10026.6	1037.95	592.292	20764.5	15677.8	19594.4	26635.5	15352	51534.2	24587.7	24343	6754.74	21396.9	3245.42	5931.31	32859.6	29143.9	20764.5	17854.3	19477.2	30333.2	1216.82	15772.1	8604.15	7016.36	7570.39	11014.9	2573.44
209	H358	849 2.7nM	24	18015.7	322.144	9662.42	983.384	578.825	21698.5	15882.9	18416.5	26108.1	16383	35596.4	24100.8	26635.5	5276.4	24834.8	4712.62	7058.59	34891.6	33189.9	25848.3	20619.7	18769.7	28001.1	388.386	12456.5	7808.75	4398.42	7251.76	12606.9	2901.55
210	H358	849 2.7nM	24	17606.1	288.3	9045.29	888.025	513.885	17588.5	14429.1	16187.6	20826.9	13521	30946	15306	24834.8	4555.09	20826.9	3601.12	5750.26	35596.4	38177.4	24834.8	19206.4	16106.9	22697.3	269.616	11719.4	8973.22	5079.66	6272.94	11614.4	1640.9
211	H358	849 8.1nM	24	15914.7	299.166	11908.4	1326.1	581.145	26108.1	15646.5	16010.5	24587.7	15063	26635.5	13440.1	22247.8	3168.46	24587.7	2576.02	5044.23	30946	34544.4	27173.6	16203.8	15898.8	24343	1202.31	12222.1	6891.2	6667.5	8119.31	11731.1	5100.02
212	H358	849 8.1nM	24	16465.1	282.308	11327.6	1159.8	575.938	23155.8	14617.9	14868.5	23623.6	14256.9	24100.8	11059	22247.8	3206.71	24587.7	2525.01	5486.25	34200.6	39340.1	28282.5	17188.6	15978.5	23623.6	1203.51	12544	8022.46	5837.16	6877.43	11766.4	4264.16
213	H358	849 24nM	24	16203.8	326.034	11316.3	1281.77	613.39	24100.8	15398.1	14868.5	21078.3	14472.4	22471.4	6457.51	17102.8	3854.51	24587.7	3307.67	6614.37	30946	39340.1	25848.3	17085.8	14002.6	18471.8	430.523	10840	6809	5990.92	6981.37	11059	4076.52
214	H358	849 24nM	24	15962.5	303.992	12519	1361.03	554.463	22697.3	14371.5	13932.8	20910.4	14058.7	18342.9	5860.56	16797.7	3371.12	24587.7	3320.93	6033	32859.6	44355.8	28566.8	17694.3	14883.4	17659	406.669	10970.9	6198.11	5286.97	6747.99	11719.4	4259.9
215	H358	849 73nM	24	15946.6	317.666	11672.6	1235.21	591.7	26903.2	15490.8	13187.2	20292.4	11801.7	12556.6	4084.68	11395.8	2462.67	25848.3	2980.96	5619.51	29143.9	39735.5	27173.6	16383	13752.8	18178.6	1182.04	9740.04	6714.34	7707.89	7871.47	11192.5	4460.43
216	H358	849 73nM	24	14779.6	355.669	12964.9	1501.17	624.53	29436.8	16448.7	14928.1	24834.8	13453.6	13346.4	4060.25	11327.6	2426	26903.2	3284.6	6291.78	26903.2	34891.6	26903.2	15693.5	14588.7	19751.8	1326.1	10373.4	6687.53	8283.33	7593.14	12394.4	3936.31
217	H358	Afatinib	24	17483.3	25.0281	13306.4	930.759	395.045	25848.3	11237.4	18769.7	25084.4	14898.3	13293.1	8062.67	17292	2675.79	28001.1	2482.45	5393.77	32209	38948.7	41772.8	19930.4	16155.2	21829.1	3568.86	10540.7	6607.76	10157.8	9320.77	13134.5	5203.05
218	H358	Afatinib	24	15646.5	17.5842	11602.8	665.142	261.91	19187.2	9633.49	15475.3	19072.4	12874.5	9788.86	4755.23	14720.6	2266.52	22247.8	1970.42	4451.52	36315.5	47572	43044.9	20272.1	13174	17588.5	3105.72	10668	7193.98	8467.58	8242.02	12406.8	5024.09
219	H358	Afat + 849 0.1	24	16042.5	21.1365	11896.5	812.406	342.75	24343	11361.7	17154.2	22471.4	13373.1	16171.4	4281.25	13042.9	2020.3	24343	1567.13	4587.08	31571.2	40538.2	34891.6	16123	15584	20231.6	2457.75	14285.5	7762.03	7376.1	7684.8	10700	3330.91
220	H358	Afat + 849 0.1	24	16220	21.8893	12088.4	811.594	338.661	22697.3	11350.3	17137.1	21938.5	13003.8	15490.8	4944.34	14515.9	2040.6	23623.6	1631.08	4398.42	34200.6	44801.6	37049.1	16831.4	15851.2	20231.6	2083.91	15078.1	7237.28	8266.78	7244.51	9730.3	2913.18
221	H358	Afat + 849 0.3	24	16481.6	41.9719	12307.9	848.101	338.323	25848.3	12406.8	17641.3	24100.8	13333	13891	4693.81	13319.7	1919.85	25591.1	1496.67	4455.97	31257.1	40538.2	38177.4	16432.2	17085.8	21141.6	2182.01	13849.4	7593.14	7517.58	7934.69	11533.4	3601.12
222	H358	Afat + 849 0.3	24	16383	45.5586	12964.9	885.365	359.243	26370.5	12456.5	18490.3	25591.1	13849.4	14691.1	4129.87	12644.8	2140.94	25084.4	1590.81	4619.31	30638.1	40134.9	37421.5	16498.1	17292	22925.4	1921.77	14898.3	6548.56	7785.36	7785.36	12064.2	3983.83
223	H358	Afat + 849 0.9	24	16547.7	34.709	12759.1	933.555	352.13	30333.2	12406.8	16106.9	22471.4	13863.3	9499.56	2287.01	9376.86	1373.34	25336.5	1149.41	3893.25	26635.5	37421.5	38948.7	15138.6	16026.5	17872.2	2177.65	11556.5	7450.23	8928.47	8291.61	11896.5	4109.27
224	H358	Afat + 849 0.9	24	16915.7	41.5958	12835.9	961.986	336.299	29436.8	11837.2	16139.1	25848.3	14171.7	9681.77	2368.47	10016.6	1455.35	26370.5	1258.91	3842.97	28853.9	40134.9	40945.6	16366.6	17606.1	20353.3	2291.59	13946.7	6836.29	8777.97	9283.55	12746.3	4324.27
225	H358	Afat + 849 2.7	24	15168.9	38.1681	13946.7	994.261	368.706	29732.6	12506.5	15709.2	20516.8	12246.6	5704.44	608.502	3401.6	1412.34	25848.3	1719.86	4736.25	20640.3	38177.4	37421.5	14705.8	14228.5	14515.9	1731.94	10764.4	5636.4	10127.4	8630	10689.3	3568.86
226	H358	Afat + 849 2.7	24	15914.7	38.9391	14764.8	981.419	367.969	28566.8	12531.5	15599.6	20723	12519	5447.98	527.422	3121.28	1410.92	24343	1365.12	4019.85	21226.4	40538.2	37421.5	15168.9	13333	14129.2	1253.88	9672.09	4619.31	10301	8275.05	11731.1	4536.9
227	H358	Afat + 849 8.1	24	15772.1	30.6306	13253.3	948.612	347.234	33189.9	11672.6	14972.9	22471.4	11441.5	4750.47	699.944	3320.93	1015.36	28001.1	1025.57	3522.76	18863.8	33523.4	38561.1	15063	14443.5	15914.7	2257.47	7840.05	4420.46	12112.6	8928.47	11327.6	5156.43
228	H358	Afat + 849 8.1	24	17051.6	33.4817	12733.6	951.462	352.13	30333.2	11487.3	14400.2	19771.6	10840	4469.36	571.92	2815.79	1082.47	26370.5	918.737	3619.17	20130.7	39340.1	41772.8	15475.3	14129.2	14086.9	2237.24	8200.91	5558.04	10219	9036.26	11452.9	4803.02
229	H358	Afat + 849 24	24	16432.2	30.9385	12431.6	965.842	364.673	29436.8	11293.7	14101	19283.4	10678.6	4125.74	466.38	2499.88	950.511	26108.1	824.684	3287.88	19771.6	39340.1	42616.6	15382.7	13507.5	13534.5	2423.58	7376.1	5208.25	9867.48	8143.7	11192.5	4689.12
230	H358	Afat + 849 24	24	16042.5	30.9694	12469	1057.86	326.36	30333.2	11103.3	13643.2	20868.6	11373	4398.42	440.98	2303.07	961.025	27446.7	858.34	3304.37	20090.5	40134.9	43914.5	16010.5	14072.8	14058.7	2104.85	8225.55	4865.86	8973.22	8299.91	11327.6	4096.96
231	H358	Afat + 849 73	24	18196.8	28.8757	13346.4	895.158	316.398	27173.6	9996.6	12644.8	19555.3	11498.8	4759.99	528.477	2487.42	1075.99	26903.2	668.476	3442.66	22697.3	43914.5	47098.7	19072.4	13494	12835.9	2014.25	7354	4934.47	9009.19	9018.2	11614.4	4949.29
232	H358	Afat + 849 73	24	17694.3	40.6094	12556.6	950.511	338.661	24834.8	10046.7	12469	16764.2	10775.2	4192.28	424.113	2435.73	1069.56	26635.5	590.518	3068.67	23388.5	49513.5	45251.9	19555.3	13121.4	11849	2109.06	6768.26	4532.37	9788.86	8022.46	11248.6	3869.96
233	H358	RMC	24	18751	242.985	13386.5	1113.21	506.235	22471.4	13333	17257.5	19477.2	15214.4	13670.6	7762.03	19129.8	2210.56	23623.6	1815.29	4959.2	34200.6	43914.5	36315.5	19244.9	13373.1	17872.2	4628.55	9662.42	7101.06	9604.63	8176.34	11103.3	4831.92
234	H358	RMC	24	18379.7	258.01	13029.9	1109.87	509.791	23861	13134.5	17997.7	21742	15244.9	14691.1	9405.03	20455.3	2303.07	25848.3	1632.72	4954.25	34544.4	40945.6	37421.5	21547.2	14242.7	21504.1	4027.9	9200.38	6700.92	10850.9	8135.56	11441.5	4798.22
235	H358	RMC + 849 0.1	24	17137.1	301.569	13359.7	1294.66	528.477	26903.2	13904.9	18196.8	23623.6	17448.3	11498.8	10916.2	21311.5	1883.71	28853.9	1423.68	4158.88	32532.7	38561.1	37797.6	21015.2	15123.4	22697.3	4023.87	8946.34	6438.18	10107.2	8225.55	11837.2	4600.87
236	H358	RMC + 849 0.1	24	17641.3	268.272	13121.4	1205.92	482.027	24587.7	13849.4	18306.3	22471.4	16514.6	12161.1	8391.71	20910.4	2166.79	28566.8	1452.44	4354.65	34544.4	42616.6	39340.1	21763.7	14058.7	21078.3	2930.71	8742.93	5372.24	9072.47	8127.43	12197.7	5151.28
237	H358	RMC + 849 0.3	24	19910.5	258.527	12246.6	1209.55	579.404	24834.8	13960.7	15444.4	21354.1	14632.5	16106.9	5546.93	16026.5	2804.55	26108.1	5115.34	11510.3	30946	39340.1	35954.1	19594.4	13240	18769.7	5100.02	10229.2	6173.37	12234.3	7816.56	10561.8	5302.85
238	H358	RMC + 849 0.3	24	16415.8	214.219	10732.2	1057.86	449.439	22247.8	12874.5	14143.4	20070.4	13346.4	14171.7	7251.76	17570.9	3232.47	27722.5	5115.34	11271.1	31571.2	38948.7	38561.1	20272.1	14779.6	21396.9	4909.85	11418.6	6425.31	11271.1	7871.47	10872.6	4831.92
239	H358	RMC+ 849 0.9	24	16865.1	269.616	11968.1	1289.49	558.917	26635.5	14559.5	14720.6	20353.3	14242.7	8875.05	3800.93	12506.5	1829.87	28853.9	4044.04	7317.32	27722.5	36680.5	34544.4	19148.9	13253.3	17979.7	3901.05	7346.66	4447.07	12594.3	7777.57	10625.4	4731.51
240	H358	RMC+ 849 0.9	24	16171.4	256.724	12149	1295.95	520.089	27446.7	14285.5	15229.7	22697.3	15229.7	9376.86	3519.24	11568	2069.37	30333.2	4319.96	7974.47	29143.9	37797.6	36680.5	19970.3	13386.5	18434.9	3219.56	7215.59	4478.3	12344.9	7800.94	10927.1	5324.11
241	H358	RMC + 849 2.7	24	19850.8	311.376	10519.6	1280.49	528.477	24587.7	13697.9	12307.9	17606.1	12939	5508.24	1790.05	7442.78	1257.65	28001.1	3364.38	6317	28282.5	39340.1	32859.6	15123.4	10850.9	14458	4134	5843	4822.27	14157.5	7398.26	11813.5	5848.85
242	H358	RMC + 849 2.7	24	19555.3	290.035	10259.9	1388.53	545.662	23623.6	12887.3	11626	18490.3	13226.8	5860.56	1281.77	6425.31	1467.04	29732.6	4154.72	8919.54	31571.2	44355.8	38561.1	16915.7	11956.1	14574.1	3655.55	6601.16	4861	11395.8	7165.26	11350.3	5059.39
243	H358	RMC + 849 8.1	24	18958.4	311.376	11147.8	1382.99	566.23	26903.2	13891	12028.1	21807.3	13187.2	6607.76	2123.88	8901.72	1226.6	30638.1	4121.62	8501.52	29732.6	40134.9	43914.5	16481.6	13200.4	15772.1	3659.2	7222.82	4851.29	11384.4	7480.09	12112.6	5580.31
244	H358	RMC + 849 8.1	24	20414.5	268.809	12344.9	1606.8	592.885	25084.4	14228.5	13306.4	21120.5	12197.7	6476.92	1672.37	8324.85	1253.88	28001.1	3162.13	7398.26	29436.8	43044.9	41357.1	18269.7	11418.6	13213.6	2872.68	5597.08	2675.79	13266.5	7517.58	12874.5	5591.48
245	H358	RMC + 849 24	24	22697.3	433.547	9367.49	1399.68	503.71	21698.5	12977.9	9887.24	15336.6	10657.3	5670.31	1332.75	6721.05	978.48	26108.1	2409.08	6266.67	28282.5	43477.6	39340.1	14200	9566.29	11696	4324.27	5558.04	5029.12	12810.2	6587.97	12088.4	5271.13
246	H358	RMC + 849 24	24	22004.4	489.312	15398.1	1195.12	492.749	22925.4	12759.1	10352.7	18069.8	11813.5	5664.65	1622.95	7158.1	1154.01	30333.2	2812.98	7339.31	30031.4	43914.5	44801.6	14972.9	10894.3	15048	4750.47	6829.46	4230.18	11384.4	6361.38	12746.3	5324.11
247	H358	RMC + 849 73	24	27446.7	693.672	12344.9	1839.04	642.264	29732.6	17017.5	13656.9	22925.4	14143.4	7093.96	1694.26	7615.95	1258.91	30031.4	2884.19	7376.1	30638.1	42616.6	43914.5	14661.8	11025.9	13399.9	3940.25	5366.87	4380.86	11568	5813.86	12173.3	6198.11
248	H358	RMC + 849 73	24	22697.3	414.884	9633.49	1642.54	525.316	22697.3	12124.7	10614.8	19264.1	11464.4	6266.67	1401.08	7179.61	1791.84	32209	2916.09	8459.12	34544.4	49020.8	50513.7	18471.8	11521.8	14530.4	3948.14	6734.5	4385.24	10280.5	5039.18	13616	4841.6
249	H358	Vistusertib	24	17676.6	102.412	13849.4	966.808	444.522	17783	14242.7	25848.3	18583	12295.6	8022.46	72.7479	347.234	37797.6	18033.7	1073.84	92967	2749.02	18863.8	4345.95	15882.9	18769.7	19034.3	4487.27	25848.3	10137.5	11293.7	7707.89	10710.7	4500.75
250	H358	Vistusertib	24	16730.7	115.932	13494	926.116	436.592	17396.1	14214.3	25084.4	18434.9	11684.3	7769.8	75.5655	441.863	35242.2	19129.8	979.459	81633.9	2517.45	17068.7	3721.94	15756.4	18583	18471.8	3873.83	26370.5	9837.93	11181.3	7376.1	11226.1	4438.18
251	H358	Vistusertib + 849 100nM	24	14632.5	273.691	14853.6	1211.97	606.073	28001.1	14958	17854.3	17729.8	10764.4	3673.87	31.817	145.184	2721.67	23623.6	480.103	37049.1	1499.67	10342.3	3301.06	14913.2	14129.2	14809.1	1824.39	9009.19	3979.85	12124.7	7465.15	9828.09	4817.45
252	H358	Vistusertib + 849 100nM	24	14809.1	286.002	14472.4	1171.45	625.781	26108.1	14661.8	18069.8	16514.6	10742.9	3725.66	43.9038	209.139	2188.56	22697.3	427.52	32209	1446.64	9405.03	3177.98	14883.4	13134.5	13561.6	1861.24	8561.24	4298.41	11544.9	7023.38	11742.9	4954.25
253	H358	Everolimus	24	17017.5	104.585	13766.6	961.025	417.381	16898.8	13200.4	27722.5	23388.5	15275.4	7273.55	142.025	476.754	29732.6	21633.5	21226.4	84120	25591.1	41357.1	17068.7	19990.2	18361.3	21655.2	5218.68	21916.6	9376.86	10742.9	8595.55	11672.6	4904.95
254	H358	Everolimus	24	16630.6	123.1	12823.1	852.352	393.862	16074.7	13108.3	25336.5	19673	14058.7	6509.38	89.5682	449.889	25591.1	20312.7	18178.6	62317.6	26903.2	46166	16932.7	20312.7	16203.8	18398	4367.74	20910.4	9063.41	9442.72	7707.89	11568	4679.75
255	H358	Everolimus + 849 100nM	24	14143.4	194.805	13602.4	1436.55	520.609	23155.8	13794.1	16730.7	17413.5	11591.2	3213.13	32.3949	199.737	2171.12	26903.2	2686.51	19206.4	20660.9	42616.6	13534.5	18215	11602.8	12531.5	1087.9	6946.55	3714.5	11293.7	8070.74	10519.6	5239.6
256	H358	Everolimus + 849 100nM	24	15444.4	240.327	14171.7	1285.62	522.696	24834.8	14030.7	17292	20702.3	12556.6	3446.11	59.5609	201.542	2004.2	28853.9	2604.51	21633.5	21504.1	42192.6	14472.4	18676.1	12100.5	13629.6	1529.97	7165.26	3877.71	11025.9	7339.31	13240	5808.05
257	H358	Vehicle	72	16781	286.002	31257.1	1141.39	506.741	24834.8	14157.5	20373.7	30946	16814.5	42192.6	30638.1	29143.9	4217.51	21247.6	1385.75	2849.79	36315.5	35242.2	30638.1	18620.2	24100.8	32532.7	2907.36	37049.1	11602.8	5213.47	6515.89	11430	4385.24
258	H358	Vehicle	72	17068.7	270.426	13069	946.717	482.992	23155.8	13960.7	20090.5	28566.8	17102.8	35242.2	29143.9	29732.6	3736.86	20537.3	1426.53	2643.87	39735.5	38561.1	32532.7	18416.5	20952.2	30946	2581.17	35954.1	10861.7	5084.75	6310.69	12332.6	3209.92
259	H358	849 0.1nM	72	19148.9	264.542	8586.96	1429.39	472.955	23861	13453.6	16932.7	31571.2	17676.6	30333.2	34200.6	30638.1	3193.91	22925.4	951.462	2004.2	31571.2	28282.5	34544.4	20231.6	18583	33189.9	970.683	16630.6	10678.6	3190.71	4367.74	11980.1	2477.49
260	H358	849 0.1nM	72	18826.1	256.467	8176.34	924.266	448.99	21099.4	12124.7	16514.6	29436.8	16932.7	35242.2	31257.1	33523.4	4096.96	23155.8	1231.51	2757.28	40945.6	34200.6	38561.1	21482.6	21785.5	34544.4	524.791	21036.2	13821.8	2641.23	6057.18	14750	4482.79
261	H358	849 0.3nM	72	18844.9	258.01	8225.55	1182.04	476.277	22026.5	12823.1	16680.6	29143.9	17694.3	35596.4	30946	34544.4	3411.82	25084.4	1149.41	2588.93	40538.2	34544.4	35596.4	21611.9	23388.5	35954.1	569.637	24100.8	12733.6	2377.96	4125.74	15398.1	3219.56
262	H358	849 0.3nM	72	18527.3	242.742	8450.66	1049.43	436.592	21247.6	13003.8	17257.5	28282.5	17818.6	33860.4	29436.8	34200.6	3751.83	25084.4	1037.95	2257.47	41357.1	37049.1	35954.1	22471.4	21698.5	34891.6	491.765	24587.7	14972.9	2361.38	2665.11	13279.8	4545.99
263	H358	849 0.9nM	72	17623.7	208.721	10435.8	1054.69	460.356	24834.8	14501.4	16090.8	25336.5	17361.3	25591.1	27173.6	29732.6	1853.81	23623.6	1095.54	2555.49	34200.6	31888.5	29436.8	21015.2	20292.4	30333.2	397.025	22247.8	9877.35	4285.53	6374.11	12456.5	2710.8
264	H358	849 0.9nM	72	19225.6	303.081	9847.76	1117.67	472.482	23155.8	14157.5	15459.8	26903.2	17223	24100.8	30638.1	31888.5	2081.82	24587.7	1094.44	2507.4	38177.4	34891.6	31571.2	21894.7	20806.1	32532.7	671.155	22925.4	10829.2	3446.11	5530.31	11908.4	2404.27
265	H358	849 2.7nM	72	16983.5	240.327	9255.75	1361.03	464.518	26108.1	15153.7	14242.7	25848.3	18269.7	20785.3	18901.6	28001.1	1763.4	30638.1	964.877	2440.6	35596.4	35596.4	31888.5	21332.8	20050.3	30946	178.931	20130.7	9595.02	2930.71	4934.47	13095.2	2754.52
266	H358	849 2.7nM	72	16580.8	169.017	9200.38	1374.71	422.843	25848.3	15260.2	13656.9	24343	16187.6	15552.9	18807.3	28001.1	1765.17	30946	903.251	2261.99	34891.6	36315.5	32532.7	21872.8	17729.8	29143.9	4.53999e-05	15321.3	8022.46	3127.53	3831.46	15063	2954.25
267	H358	849 8.1nM	72	15552.9	379.555	131926	2812.98	647.423	30031.4	17068.7	15930.6	26635.5	18124.1	18527.3	9172.82	20373.7	1968.45	32532.7	1032.77	2790.57	25084.4	35954.1	26635.5	17535.8	17240.2	22247.8	336.635	16614	8769.2	4605.47	6981.37	11637.6	4276.97
268	H358	849 8.1nM	72	15756.4	348.278	12606.9	2264.25	609.111	29436.8	17465.8	15290.7	23388.5	19360.7	14617.9	12076.3	23623.6	1790.05	36315.5	1003.25	2804.55	28566.8	36315.5	28566.8	18453.3	17448.3	27722.5	598.245	15882.9	8595.55	4019.85	5653.33	12357.3	4924.61
269	H358	849 24nM	72	13293.1	316.081	11475.8	2090.17	614.003	23388.5	15646.5	14002.6	17120	14185.9	12519	4328.6	15646.5	1851.96	29732.6	935.424	1806.24	19341.3	37049.1	22247.8	14838.8	12977.9	16564.2	4.53999e-05	13932.8	5949.13	7150.95	5399.17	10818.4	4298.41
270	H358	849 24nM	72	12733.6	323.759	11510.3	2609.72	598.245	21850.9	15693.5	13932.8	15867.1	13561.6	13121.4	4424.89	15978.5	1980.29	28282.5	1019.43	1689.18	18901.6	38561.1	21938.5	15930.6	11801.7	14868.5	4.53999e-05	14545	7136.66	7093.96	5340.1	11226.1	5151.28
271	H358	849 73nM	72	13602.4	462.201	14115.1	2578.6	758.24	30946	17872.2	15108.3	22247.8	16881.9	16399.4	4731.51	13440.1	2289.3	38177.4	1043.15	2864.07	17535.8	36680.5	25848.3	16139.1	14617.9	19457.7	639.7	19555.3	6660.83	7684.8	7684.8	13656.9	5213.47
272	H358	849 73nM	72	13174	479.623	13849.4	2455.29	725.601	29436.8	17361.3	14299.8	21268.9	15724.9	15740.6	4163.03	14129.2	2277.88	37797.6	1024.54	2801.75	18416.5	37797.6	25848.3	15306	14101	18196.8	850.649	20764.5	6528.94	7600.73	6361.38	11170.1	4994.04
273	H358	Vistusertib	72	17783	123.965	14385.8	1456.8	386.449	24343	14285.5	24587.7	22247.8	14501.4	7244.51	195.978	603.05	7654.12	26370.5	938.234	15398.1	3619.17	22697.3	8425.34	20292.4	16932.7	28853.9	6272.94	25848.3	9386.24	10593.5	10321.7	11684.3	6444.61
274	H358	Vistusertib	72	18398	87.7946	12419.2	978.48	356.737	19890.5	12332.6	21057.2	16317.6	11395.8	6406.06	102.309	463.126	7570.39	21547.2	648.071	14030.7	2494.89	15275.4	4482.79	19633.7	13507.5	20496.3	4541.44	22697.3	9200.38	9847.76	8690.62	11837.2	5825.5
275	H358	Vistusertib + 849 100nM	72	12887.3	172.95	12913.1	1256.39	498.199	19072.4	12861.6	14588.7	7824.38	7863.6	4464.89	24.2884	172.087	2316.93	18471.8	376.531	10168	778.213	4298.41	1889.37	14086.9	8690.62	8391.71	1840.88	11872.7	2904.45	17413.5	6069.31	9652.77	4865.86
276	H358	Vistusertib + 849 100nM	72	14044.7	165.339	73865.4	1365.12	459.436	20557.9	13293.1	15352	9480.57	8535.59	5140.99	13.41	155.555	2433.29	21036.2	418.635	9996.6	866.966	4703.21	1912.18	15584	9672.09	8484.53	1195.12	12632.1	2869.81	16647.2	5120.46	12136.8	6335.98
277	H358	Everolimus	72	20516.8	133.887	12823.1	1219.26	442.748	24834.8	13319.7	23861	30638.1	22026.5	11248.6	185.861	485.899	5878.16	29436.8	7310.01	9847.76	33860.4	37797.6	24100.8	23388.5	19516.2	32209	8086.9	27446.7	9480.57	9255.75	9461.63	13293.1	6136.44
278	H358	Everolimus	72	19633.7	128.638	11361.7	1009.29	374.653	19970.3	11920.3	19930.4	25084.4	18638.8	7879.35	138.795	441.421	6254.15	28282.5	5919.46	8839.63	35242.2	40945.6	23388.5	23388.5	16814.5	26903.2	6747.99	22247.8	8299.91	8716.73	8046.56	12990.8	6355.02
279	H358	Everolimus + 849 100nM	72	14458	298.867	13095.2	1982.27	648.719	25848.3	13656.9	15398.1	17085.8	15740.6	8416.93	100.988	311.064	4080.6	52052.1	1542.25	7237.28	18288	48533	14314.1	21655.2	16663.9	18901.6	3268.22	23861	4175.54	15930.6	6361.38	12295.6	6721.05
280	H358	Everolimus + 849 100nM	72	14853.6	289.745	12569.1	1954.72	586.985	24343	13467	15599.6	17535.8	15537.3	9228.02	71.3787	325.057	3334.24	43044.9	1501.17	6051.13	15260.2	42616.6	12185.5	18269.7	13697.9	14058.7	2079.74	19890.5	3071.74	16171.4	5937.24	14987.9	6960.45
281	H1373	Vehicle	6	38948.7	1632.72	12797.4	221.85	1582.88	18769.7	17818.6	26370.5	26370.5	20394.1	24834.8	43914.5	44355.8	7887.22	17659	174.513	75.4145	23861	40134.9	14853.6	22697.3	25848.3	27446.7	3432.35	17783	14185.9	2030.42	7615.95	25336.5	25336.5
282	H1373	Vehicle	6	36680.5	1745.86	12444.1	170.545	1469.97	18215	17908	24100.8	22471.4	19831	16663.9	40945.6	47098.7	5223.9	17102.8	110.941	4.53999e-05	24834.8	42616.6	15048	21354.1	24343	26903.2	3586.75	17413.5	14661.8	2071.44	7646.48	21439.7	24587.7
283	H1373	849 0.1nM	6	36680.5	603.653	7934.69	141.599	849.799	13946.7	13134.5	21332.8	26635.5	22925.4	23388.5	38561.1	51534.2	7487.57	18508.8	387.61	787.608	24343	38948.7	16630.6	19870.7	23388.5	24587.7	7785.36	19910.5	24834.8	3294.47	7840.05	21439.7	32532.7
284	H1373	849 0.1nM	6	33860.4	665.142	7237.28	148.265	943.881	14400.2	13849.4	22697.3	26635.5	24343	22697.3	36680.5	50513.7	7288.11	17483.3	382.221	991.283	24587.7	40538.2	16514.6	20931.3	24587.7	23623.6	7037.44	19950.3	27446.7	3010.92	8299.91	22925.4	35596.4
285	H1373	849 0.3nM	6	40134.9	778.991	9330.09	179.289	1017.39	18196.8	14691.1	26903.2	34200.6	23388.5	29436.8	52052.1	46166	9643.12	22247.8	432.248	788.396	22925.4	31571.2	15214.4	18069.8	27722.5	30031.4	7731.05	20475.8	21785.5	3297.76	7700.19	32532.7	34891.6
286	H1373	849 0.3nM	6	37797.6	732.161	7435.34	229.293	1047.33	14545	12797.4	21960.5	24834.8	20660.9	25848.3	33860.4	45706.7	8866.19	19053.4	254.423	4.53999e-05	25336.5	40538.2	15093.2	17925.9	22697.3	22925.4	5161.59	17292	23155.8	2363.74	7895.12	22697.3	32859.6
287	H1373	849 0.9nM	6	41772.8	1251.38	12004.1	234.393	1445.2	21655.2	17961.7	29143.9	32859.6	23861	29732.6	52575.2	45706.7	7427.91	19614	276.718	421.998	21482.6	30946	14898.3	21099.4	29143.9	29732.6	5497.23	17068.7	18069.8	3778.19	5115.34	24587.7	30333.2
288	H1373	849 0.9nM	6	40134.9	810.783	11103.3	195	1134.56	18434.9	14943	27722.5	26635.5	20171	27446.7	44801.6	43914.5	7593.14	16865.1	252.901	334.287	20847.7	35596.4	14228.5	20312.7	24587.7	25084.4	4129.87	17188.6	16547.7	2651.82	5619.51	19477.2	21162.8
289	H1373	849 2.7nM	6	40134.9	1246.38	11860.9	225.653	1343.46	20764.5	17783	26903.2	30946	23155.8	23861	37049.1	39735.5	5074.58	18033.7	256.724	281.181	20171	33189.9	14185.9	18471.8	25336.5	24587.7	4247.14	14958	18527.3	4044.04	6039.04	22925.4	23388.5
290	H1373	849 2.7nM	6	37421.5	741.741	10332	222.294	993.268	16106.9	15184	23155.8	22697.3	18694.8	21396.9	30638.1	39735.5	5393.77	14883.4	180.368	224.528	20130.7	38561.1	14299.8	18471.8	20806.1	19535.7	2930.71	13200.4	15244.9	2919.01	6483.4	20619.7	20619.7
291	H1373	849 8.1nM	6	37421.5	995.256	13426.7	225.879	1170.28	20090.5	17085.8	24100.8	28282.5	20537.3	16865.1	37797.6	42616.6	2540.21	17274.7	259.823	199.537	16531.1	31257.1	14256.9	17676.6	24100.8	18807.3	2829.91	12088.4	13480.5	4319.96	5388.38	23623.6	37421.5
292	H1373	849 8.1nM	6	35954.1	863.505	11992.1	188.859	952.414	16949.6	15994.5	20110.6	20090.5	17274.7	10861.7	28282.5	46166	2050.83	15123.4	85.4559	151.714	17800.8	39340.1	15017.9	19930.4	19555.3	15168.9	1403.89	12100.5	13697.9	2972.03	5524.79	18977.3	28282.5
293	H1373	849 24nM	6	34891.6	1269.02	11837.2	172.432	1395.49	17979.7	17500.8	19129.8	21247.6	17606.1	17606.1	21568.7	36680.5	2140.94	14574.1	68.786	105.953	16187.6	38948.7	14472.4	19751.8	21894.7	13780.4	1215.61	7998.43	12064.2	3781.97	5426.23	21162.8	28566.8
294	H1373	849 24nM	6	33189.9	970.683	11003.8	136.729	1127.77	16432.2	16058.6	17800.8	21354.1	17783	14705.8	19712.3	33523.4	1962.55	14285.5	151.411	379.935	13507.5	36315.5	14185.9	17535.8	19418.9	13835.6	2694.59	10905.3	11259.9	3677.54	5039.18	19302.7	23861
295	H1373	849 73nM	6	33860.4	1486.23	14314.1	189.616	1592.4	22925.4	18527.3	18713.5	26903.2	17890	16268.7	24343	31571.2	1654.08	17535.8	189.048	429.663	14705.8	30333.2	14530.4	16865.1	25084.4	16966.6	3022.98	9330.09	9452.18	5213.47	7368.72	26370.5	25591.1
296	H1373	849 73nM	6	33189.9	1425.1	14617.9	205.203	1468.5	22471.4	18788.5	19418.9	24100.8	16915.7	13266.5	26635.5	32859.6	1601.99	17800.8	147.821	334.287	13548.1	29732.6	13752.8	17997.7	24343	17000.5	2284.72	9433.29	10689.3	5161.59	7465.15	21396.9	27173.6
297	H1373	Vehicle	24	34200.6	940.113	15153.7	254.169	1012.32	21504.1	14617.9	33860.4	28282.5	22471.4	38561.1	53103.6	47098.7	11418.6	16680.6	411.579	59.7997	27722.5	37421.5	11884.6	21099.4	25848.3	24587.7	2638.59	17068.7	9302.14	4109.27	7777.57	23861	25591.1
298	H1373	Vehicle	24	32209	899.645	15475.3	174.164	1001.25	19168	14691.1	30333.2	24100.8	21354.1	27446.7	48533	43914.5	7684.8	16155.2	221.406	4.53999e-05	25084.4	37421.5	11544.9	20994.2	22697.3	22697.3	2507.4	15803.7	9265.01	4307.01	7201.18	20785.3	25591.1
299	H1373	849 0.1nM	24	34544.4	1164.45	15138.6	160.132	1267.75	22925.4	17326.6	33189.9	30031.4	21829.1	27722.5	64860.9	49020.8	7692.49	19732.1	397.82	386.449	23861	30946	10540.7	19950.3	28282.5	33860.4	4433.75	19072.4	12887.3	4591.67	6884.31	28001.1	29732.6
300	H1373	849 0.1nM	24	33523.4	1155.17	14943	201.341	1237.69	21162.8	17659	31888.5	28282.5	20130.7	25848.3	62944	44801.6	7208.39	19751.8	313.563	61.2522	22026.5	28566.8	9710.86	18416.5	27173.6	34200.6	4068.38	18416.5	11707.7	4505.26	7762.03	23861	31571.2
301	H1373	849 0.3nM	24	35596.4	1152.86	14661.8	203.161	1229.05	21611.9	16730.7	31257.1	27722.5	20910.4	26370.5	56954	46166	6768.26	19399.5	237.936	4.53999e-05	25591.1	34544.4	11614.4	20110.6	27446.7	33189.9	3398.19	16881.9	11696	3508.7	7093.96	24343	26635.5
302	H1373	849 0.3nM	24	35242.2	1391.31	15063	199.537	1270.29	22471.4	17570.9	30946	29143.9	21872.8	24834.8	60475.9	43477.6	6241.65	20599	252.144	85.0296	25084.4	33189.9	11789.9	18807.3	26903.2	33860.4	3484.22	16697.3	11932.2	3222.78	7570.39	24834.8	26635.5
303	H1373	849 0.9nM	24	32859.6	727.781	15184	154.934	1019.43	22247.8	15199.2	29732.6	26108.1	21894.7	20353.3	52575.2	51534.2	5250.09	18106	625.781	249.386	25084.4	33523.4	10949	20785.3	24587.7	29732.6	3611.94	14824	10551.3	4179.72	6235.41	23861	32209
304	H1373	849 0.9nM	24	35242.2	870.441	15002.9	153.239	1004.25	22026.5	15740.6	30946	25591.1	22247.8	19771.6	56387.3	51021.4	5024.09	19399.5	555.018	75.49	26635.5	36680.5	12295.6	21247.6	26370.5	29732.6	3287.88	17068.7	10721.4	3284.6	6254.15	24587.7	27173.6
305	H1373	849 2.7nM	24	34544.4	1009.29	16481.6	198.74	1185.6	25336.5	14928.1	29436.8	27173.6	22697.3	17747.5	61697.6	50513.7	4031.93	21332.8	453.502	4.53999e-05	27446.7	34544.4	12456.5	20496.3	25848.3	29732.6	2499.88	15093.2	10137.5	3508.7	6542.01	27173.6	31571.2
306	H1373	849 2.7nM	24	35596.4	889.803	15017.9	202.553	992.275	24100.8	15962.5	29732.6	28001.1	23155.8	20599	57526.4	46630	4491.76	21547.2	532.722	15.6739	26108.1	35242.2	11944.2	20373.7	26635.5	28853.9	2977.98	16042.5	10488.1	3047.27	6788.6	23623.6	30031.4
307	H1373	849 8.1nM	24	32209	753.704	15352	208.513	941.995	26108.1	14943	24100.8	25848.3	22247.8	13346.4	54176.3	56387.3	2686.51	20847.7	339	69.2692	26635.5	37797.6	12064.2	19850.8	20785.3	19457.7	2048.78	11932.2	7746.53	3920.6	7215.59	25848.3	40538.2
308	H1373	849 8.1nM	24	31571.2	762.041	15413.5	196.174	891.585	24343	14472.4	23623.6	23155.8	20931.3	12004.1	54176.3	53103.6	2628.06	20557.9	324.083	38.3594	24834.8	37421.5	11992.1	19990.2	20973.2	18508.8	1553.09	11373	8054.61	3721.94	6795.39	25084.4	29732.6
309	H1373	849 24nM	24	28566.8	716.229	13616	182.911	809.972	19990.2	12797.4	19653.3	17908	18901.6	11237.4	28853.9	44801.6	2203.94	16898.8	393.075	4.53999e-05	22697.3	45251.9	13629.6	21720.2	15002.9	11778.1	295.007	7361.36	6974.39	2790.57	6727.78	20785.3	23623.6
310	H1373	849 24nM	24	28566.8	570.778	12670.1	153.7	778.991	19244.9	12258.8	19283.4	17979.7	19015.3	12431.6	28853.9	44801.6	2768.33	17500.8	387.998	30.7534	23155.8	47572	14400.2	22026.5	16848.2	12149	972.626	8804.34	7179.61	2497.39	6581.38	17979.7	25848.3
311	H1373	849 73nM	24	29732.6	579.404	15693.5	180.729	865.234	30333.2	13588.8	22471.4	28282.5	25336.5	13440.1	46166	49020.8	2190.75	23861	628.917	297.674	21590.3	33860.4	15459.8	21268.9	19930.4	14530.4	1133.43	8535.59	5990.92	4755.23	7707.89	27446.7	43914.5
312	H1373	849 73nM	24	30638.1	613.39	15677.8	201.14	852.352	32532.7	13918.9	23388.5	30333.2	25591.1	18324.6	48050.1	44801.6	2651.82	24587.7	723.427	295.894	20952.2	33523.4	15803.7	21960.5	20578.5	15630.8	1019.43	8830.8	6515.89	4230.18	8476.05	28282.5	33860.4
313	H1373	Vehicle	72	38561.1	442.305	16465.1	253.915	728.509	29436.8	13711.6	28282.5	34200.6	28853.9	13643.2	46166	46166	7547.71	21785.5	795.523	706.978	18196.8	30638.1	15398.1	19168	24100.8	20868.6	3278.04	15093.2	11487.3	4755.23	8275.05	23623.6	18657.4
314	H1373	Vehicle	72	39340.1	722.704	16106.9	234.393	886.251	28566.8	14443.5	31571.2	33523.4	28853.9	11672.6	49513.5	46166	6063.24	23623.6	698.545	319.258	19034.3	32859.6	16764.2	20231.6	24834.8	21829.1	3418.65	15552.9	11684.3	4251.38	8493.02	21120.5	16155.2
315	H1373	849 0.1nM	72	39340.1	638.422	15490.8	267.468	849.799	29732.6	14735.3	30946	35954.1	31571.2	11259.9	54720.8	46630	5059.39	25591.1	709.812	228.835	19418.9	32859.6	16797.7	21015.2	25336.5	23623.6	3740.6	16714	10829.2	3842.97	8184.52	21184	17171.4
316	H1373	849 0.1nM	72	41357.1	697.847	16647.2	220.964	852.352	31571.2	14545	33523.4	38561.1	34200.6	11259.9	53637.3	45251.9	5079.66	27722.5	880.949	95.8707	19555.3	32532.7	18638.8	20952.2	25084.4	25591.1	3466.84	16714	11837.2	3666.53	8442.22	21785.5	18324.6
317	H1373	849 0.3nM	72	37421.5	803.518	13279.8	253.915	928.899	27173.6	15490.8	28282.5	31257.1	30333.2	12848.7	34544.4	43914.5	5761.77	22471.4	702.047	1025.57	18844.9	32532.7	16630.6	19380.1	20806.1	19594.4	4793.42	13413.3	15506.3	3816.16	9528.09	21547.2	17979.7
318	H1373	849 0.3nM	72	38177.4	666.473	12990.8	254.169	781.332	28853.9	15017.9	28853.9	31888.5	28282.5	9681.77	36680.5	40538.2	3519.24	22247.8	691.595	388.775	17712	30031.4	15930.6	17800.8	20557.9	20475.8	3744.34	12469	12469	4582.5	10117.3	20743.7	17588.5
319	H1373	849 0.9nM	72	37421.5	617.081	13684.2	250.135	806.739	26635.5	14115.1	27173.6	32532.7	29143.9	12088.4	37049.1	37049.1	6093.64	22471.4	535.392	152.78	17606.1	30031.4	15184	17430.9	19614	19535.7	3729.39	13521	13147.7	4200.67	9585.44	21633.5	17890
320	H1373	849 0.9nM	72	36315.5	866.1	13988.6	288.011	934.489	30031.4	13725.4	27173.6	34200.6	28853.9	11813.5	43914.5	38561.1	3916.68	23388.5	501.197	392.29	17623.7	27722.5	15459.8	17309.3	21418.3	22471.4	4798.22	13863.3	12990.8	4712.62	9691.46	23388.5	20292.4
321	H1373	849 2.7nM	72	40134.9	1331.42	13808	275.614	1426.53	35242.2	18106	27173.6	38948.7	36680.5	11361.7	49020.8	48533	2581.17	29436.8	681.98	738.78	17465.8	26903.2	14647.1	18901.6	20681.6	24834.8	7562.82	12124.7	16042.5	5366.87	11707.7	29436.8	29143.9
322	H1373	849 2.7nM	72	38561.1	985.353	13373.1	251.892	1143.67	33860.4	17034.6	25591.1	33189.9	31888.5	8786.75	46166	42616.6	2158.14	27722.5	530.065	569.068	14898.3	25848.3	14228.5	16123	18732.2	22925.4	6781.81	11407.2	15229.7	5084.75	11259.9	24100.8	23623.6
323	H1373	849 8.1nM	72	30946	895.158	12076.3	287.436	923.342	28001.1	14385.8	22697.3	29436.8	28853.9	9045.29	29436.8	34200.6	2591.52	26903.2	642.907	457.145	12835.9	25591.1	12295.6	14044.7	15506.3	17102.8	4822.27	10373.4	12004.1	6849.97	10949	27722.5	33523.4
324	H1373	849 8.1nM	72	30946	603.05	11591.2	222.294	752.198	26108.1	13373.1	21829.1	28282.5	28001.1	8283.33	25591.1	33523.4	2140.94	26370.5	601.244	642.907	11707.7	28282.5	12720.9	14101	14115.1	15244.9	3703.38	8937.4	12028.1	5508.24	10872.6	25848.3	25336.5
325	H1373	849 24nM	72	28001.1	786.821	10689.3	280.62	832.972	26108.1	13480.5	19771.6	26903.2	30333.2	8119.31	25591.1	39735.5	2109.06	32532.7	812.406	424.962	10435.8	27722.5	11801.7	14943	13521	14720.6	6788.6	10270.2	15214.4	5377.61	9857.62	27446.7	34200.6
326	H1373	849 24nM	72	26903.2	760.518	10404.6	223.632	804.322	25848.3	13174	19091.5	24587.7	27173.6	7435.34	24343	34891.6	1855.67	30031.4	772.784	471.067	9887.24	28001.1	11395.8	12295.6	12028.1	14342.8	5943.18	11672.6	12456.5	5552.48	9556.72	23861	29732.6
327	H1373	849 73nM	72	25848.3	834.64	10540.7	302.778	812.406	28566.8	12951.9	17854.3	26903.2	28566.8	8484.53	24834.8	37049.1	2085.99	38948.7	823.036	553.355	10540.7	30333.2	13656.9	13739.1	13480.5	16680.6	7555.27	9996.6	11849	6130.3	9090.63	30638.1	31257.1
328	H1373	849 73nM	72	24587.7	721.982	10036.7	169.695	873.93	27446.7	12695.5	16647.2	25084.4	30638.1	6714.34	20973.2	31888.5	1395.49	32859.6	475.801	68.786	9808.45	29143.9	12606.9	12594.3	10311.3	21439.7	3819.98	8467.58	11430	3565.29	9405.03	26370.5	31571.2
329	H2030	Vehicle	6	16415.8	99.3849	11742.9	826.335	442.748	15398.1	13534.5	23388.5	13160.8	8612.76	37421.5	17553.3	21698.5	50513.7	22471.4	9847.76	11226.1	11350.3	27722.5	6154.88	14958	14764.8	8690.62	1564	14750	9163.65	8283.33	8291.61	10818.4	4411.63
330	H2030	Vehicle	6	17361.3	101.393	12594.3	805.932	468.717	16932.7	14044.7	26635.5	15537.3	9662.42	45706.7	14545	21763.7	66171.2	25336.5	11707.7	14086.9	13293.1	29143.9	6627.61	17292	16730.7	9461.63	1714.71	15851.2	9877.35	7990.43	7346.66	10894.3	1806.24
331	H2030	849 0.1nM	6	17588.5	138.795	7762.03	792.348	419.054	15724.9	11660.9	22247.8	15168.9	9509.06	45706.7	18379.7	23861	63576.6	27722.5	10498.6	12419.2	13891	25591.1	7324.65	17518.3	16764.2	11672.6	428.804	15352	16966.6	5420.8	5110.23	11475.8	1758.12
332	H2030	849 0.1nM	6	17500.8	107.447	10270.2	909.596	383.753	15994.5	12040.1	22471.4	14559.5	8892.83	49020.8	20994.2	23388.5	71682.4	27722.5	10509.1	14987.9	13440.1	24343	6380.49	17694.3	15962.5	11637.6	491.273	15709.2	14214.3	5297.55	4934.47	12040.1	2123.88
333	H2030	849 0.3nM	6	18863.8	114.549	8324.85	895.158	396.232	15382.7	12344.9	21568.7	13440.1	8135.56	45706.7	17747.5	23623.6	58104.6	26903.2	8416.93	10710.7	13333	27173.6	6721.05	17659	14228.5	10657.3	88.2347	12569.1	12124.7	4076.52	4665.73	12064.2	5647.68
334	H2030	849 0.3nM	6	19457.7	99.0872	8991.19	887.138	437.466	15930.6	12771.9	22471.4	15835.4	9480.57	44355.8	17483.3	22925.4	52575.2	27446.7	7746.53	9339.43	13095.2	24834.8	6075.38	16350.3	14271.2	14101	487.846	13752.8	15882.9	5177.1	6057.18	14764.8	3456.46
335	H2030	849 0.9nM	6	16697.3	108.744	8699.32	823.036	391.114	14314.1	13029.9	20496.3	12052.2	8459.12	30638.1	15033	21850.9	34891.6	21872.8	5675.99	6856.83	10764.4	25336.5	6594.56	16301.3	13904.9	7816.56	385.291	9907.03	9367.49	7746.53	5350.79	10137.5	1169.11
336	H2030	849 0.9nM	6	17326.6	77.7113	9000.18	757.482	407.483	15093.2	12682.8	22697.3	13319.7	8383.33	38177.4	15123.4	22925.4	40134.9	23861	6045.08	8070.74	11684.3	26635.5	6548.56	17396.1	15048	8333.18	315.766	10540.7	7738.79	6660.83	5074.58	10352.7	1104.34
337	H2030	849 2.7nM	6	17943.8	86.4011	15398.1	845.561	437.466	16350.3	13016.9	22471.4	14486.9	9828.09	34891.6	13974.6	22925.4	20231.6	26370.5	4929.54	6148.72	12136.8	27722.5	7093.96	18233.2	14958	8450.66	217.892	9054.35	9117.95	5984.93	5034.15	11226.1	3673.87
338	H2030	849 2.7nM	6	18215	106.485	9779.07	795.523	479.143	17908	13588.8	23623.6	16106.9	9191.19	38561.1	23155.8	28282.5	24834.8	31888.5	6260.4	7785.36	14603.3	30638.1	8400.11	20434.9	18324.6	10732.2	607.286	13293.1	7669.45	6734.5	4870.74	10905.3	3446.11
339	H2030	849 8.1nM	6	17641.3	71.8083	10415	878.31	411.99	16090.8	12759.1	20191.2	14299.8	9499.56	25591.1	15787.9	24343	5884.05	24343	5171.92	6431.74	11944.2	28853.9	7998.43	17205.8	13187.2	7023.38	906.871	7593.14	7684.8	6568.23	7707.89	12926.1	4500.75
340	H2030	849 8.1nM	6	16814.5	65.6935	10394.2	905.964	430.092	15914.7	12682.8	19091.5	14314.1	9209.59	27446.7	19302.7	25084.4	5943.18	26108.1	5453.43	7129.52	11092.2	27446.7	7361.36	17361.3	13386.5	7707.89	244.203	7093.96	7136.66	7244.51	7895.12	11092.2	3235.7
341	H2030	849 24nM	6	15093.2	134.424	9614.23	837.985	456.688	14185.9	12670.1	16448.7	11956.1	9274.28	23623.6	7510.07	17274.7	2732.58	23388.5	3258.43	4875.61	9274.28	25084.4	6014.93	14987.9	12124.7	10467.2	1665.7	7383.47	7324.65	8070.74	8070.74	11081.1	2300.77
342	H2030	849 24nM	6	17430.9	105.425	10477.7	977.502	470.126	17344	13187.2	18826.1	16301.3	10280.5	34544.4	10249.7	20764.5	3099.51	27722.5	4518.79	5733.03	11544.9	27173.6	7208.39	16415.8	15398.1	7777.57	1423.68	9936.8	8612.76	7086.88	8275.05	13016.9	3808.54
343	H2030	849 73nM	6	17872.2	107.447	12209.9	984.368	459.436	18490.3	12913.1	17836.5	14943	9518.57	28566.8	16317.6	21375.5	2289.3	25336.5	4587.08	5860.56	11373	27173.6	7863.6	15244.9	13904.9	7280.83	1380.22	8518.54	6179.55	8518.54	8751.67	13426.7	5064.44
344	H2030	849 73nM	6	17120	173.296	11789.9	1073.84	427.52	17623.7	12456.5	16614	14530.4	9547.17	22471.4	12332.6	19380.1	2409.08	28001.1	4722.06	5872.29	11731.1	27446.7	7974.47	15962.5	14414.6	7244.51	1682.44	8955.3	4914.77	7623.57	8716.73	11430	3206.71
345	H2030	Afatinib	6	18527.3	25.2544	20537.3	702.749	341.04	18288	10056.8	24100.8	13711.6	10583	21742	15803.7	23388.5	14661.8	27173.6	2801.75	4679.75	11192.5	31257.1	9710.86	17535.8	12431.6	6877.43	2576.02	14072.8	6298.08	10168	8742.93	11860.9	5276.4
346	H2030	Afatinib	6	19614	9.10661	13629.6	655.239	314.191	17800.8	10137.5	23861	13891	10519.6	19110.6	14115.1	24587.7	12016.1	26635.5	2716.23	4242.89	12185.5	33523.4	9897.13	17676.6	11908.4	6581.38	1878.07	11092.2	6026.97	9509.06	7879.35	13849.4	5074.58
347	H2030	Afat + 849 0.1	6	16139.1	8.61065	13306.4	837.147	383.753	17413.5	11579.6	22925.4	13095.2	9348.77	18178.6	13739.1	23861	7700.19	23155.8	973.6	2356.66	10467.2	28282.5	6680.85	13440.1	12283.4	7692.49	1976.34	8875.05	7136.66	10807.5	9386.24	12100.5	5302.85
348	H2030	Afat + 849 0.1	6	16203.8	24.1431	14030.7	890.693	389.943	16597.4	11327.6	22697.3	12431.6	8830.8	17171.4	16680.6	22697.3	7413.07	22026.5	854.059	1931.4	9749.78	27446.7	6179.55	13293.1	11614.4	6640.88	1946.91	8875.05	7746.53	10625.4	9200.38	11932.2	4605.47
349	H2030	Afat + 849 0.3	6	16415.8	14.9992	13108.3	724.151	381.458	17017.5	11384.4	22471.4	13003.8	9358.12	16203.8	14545	22026.5	6548.56	24834.8	961.025	2111.18	11114.4	30638.1	7273.55	15552.9	11825.3	7009.35	1966.48	8358.21	6960.45	8821.97	7502.57	9818.27	3846.81
350	H2030	Afat + 849 0.3	6	15882.9	7.19222	14853.6	809.972	416.547	17729.8	11932.2	24100.8	13359.7	8883.94	17413.5	14101	20702.3	7502.57	23623.6	888.914	1958.63	10097.1	26370.5	6185.73	13588.8	12076.3	7230.04	1866.84	9367.49	6687.53	11248.6	8062.67	12040.1	2651.82
351	H2030	Afat + 849 0.9	6	14853.6	33.5488	13359.7	765.095	390.723	16983.5	11556.5	20826.9	10840	8892.83	12246.6	13932.8	25084.4	3979.85	22247.8	873.93	2576.02	9575.85	28001.1	6911.9	13042.9	11271.1	6425.31	2389.88	7383.47	6457.51	11849	9788.86	11407.2	4251.38
352	H2030	Afat + 849 0.9	6	15898.8	16.6099	14779.6	837.147	376.531	17378.7	11754.6	21742	12004.1	9072.47	13160.8	14486.9	23623.6	3808.54	21960.5	806.739	1986.24	10117.3	28282.5	6674.17	12708.2	11649.3	6298.08	1879.95	7465.15	5693.04	11103.3	11214.9	9255.75	3733.12
353	H2030	Afat + 849 2.7	6	17570.9	33.4483	13960.7	730.698	370.554	19148.9	11533.4	21311.5	14603.3	10614.8	20312.7	12977.9	22026.5	2787.78	27446.7	545.117	2239.48	10883.5	29732.6	6795.39	13877.2	13752.8	6451.06	2594.11	6204.31	7002.34	10467.2	10198.5	10208.7	4954.25
354	H2030	Afat + 849 2.7	6	17943.8	19.9454	14115.1	901.446	389.553	18657.4	11271.1	21655.2	14385.8	10097.1	19187.2	17051.6	22697.3	3274.76	26635.5	534.323	1818.92	12271.1	32209	7608.34	14342.8	13835.6	7002.34	2219.42	7495.06	6451.06	9265.01	8467.58	12382	1095.54
355	H2030	Afat + 849 8.1	6	17606.1	31.3433	14328.4	701.345	379.555	17570.9	11014.9	18251.5	12835.9	8955.3	15214.4	8391.71	21938.5	1707.87	22925.4	565.098	2702.68	10949	32532.7	7273.55	14972.9	11170.1	4875.61	2328.55	6310.69	5265.86	10117.3	9461.63	11637.6	3586.75
356	H2030	Afat + 849 8.1	6	16865.1	23.1039	109098	839.662	367.602	18233.2	10363	17800.8	14545	7895.12	14256.9	13616	22471.4	1751.1	23388.5	607.894	2280.16	10678.6	29732.6	7065.65	14472.4	12531.5	5377.61	2323.89	6361.38	5530.31	11696	9585.44	9490.06	4438.18
357	H2030	Afat + 849 24	6	17205.8	31.0004	14271.2	696.453	364.308	17068.7	10530.2	17188.6	11813.5	8484.53	12682.8	8569.8	20090.5	1534.56	24587.7	527.422	1958.63	11339	33860.4	7738.79	14661.8	10829.2	4712.62	2115.4	4788.63	5234.36	9847.76	8786.75	11754.6	3200.3
358	H2030	Afat + 849 24	6	15898.8	25.2291	13521	807.546	379.935	17240.2	10394.2	17518.3	11860.9	7903.02	11956.1	10352.7	20764.5	1537.63	24587.7	518.531	1763.4	11521.8	31257.1	7450.23	13808	10861.7	5223.9	2050.83	5084.75	4514.28	11070.1	8258.51	13306.4	4861
359	H2030	Afat + 849 73	6	17836.5	23.1501	69563.8	566.796	354.603	16415.8	9759.53	16481.6	12874.5	8751.67	15521.8	8848.47	21547.2	1314.22	21311.5	1031.74	3044.22	10561.8	30333.2	7677.12	17017.5	10168	4651.75	1672.37	5552.48	4875.61	10646.6	8595.55	12469	4979.08
360	H2030	Afat + 849 73	6	17783	33.6832	14314.1	771.24	326.36	16203.8	9710.86	16663.9	11626	8883.94	14385.8	10056.8	22471.4	1573.41	23861	1225.37	2889.97	11271.1	33523.4	8383.33	17344	11719.4	4670.4	2061.11	7654.12	5004.03	10477.7	8176.34	9136.2	4044.04
361	H2030	RMC	6	17518.3	98.396	12456.5	723.427	362.491	17641.3	11731.1	21916.6	12913.1	9575.85	28853.9	11789.9	24834.8	4294.11	25336.5	3808.54	5738.77	12644.8	31571.2	7832.21	18490.3	12016.1	5738.77	2232.77	7903.02	4875.61	11464.4	8638.64	12771.9	6111.95
362	H2030	RMC	6	19091.5	90.6495	12332.6	745.459	386.836	16139.1	11568	21785.5	13588.8	10157.8	26108.1	15214.4	25591.1	3971.9	26108.1	3699.67	5166.76	13121.4	32532.7	7863.6	17979.7	12283.4	5837.16	2130.26	7631.19	5613.9	10850.9	8830.8	10332	4221.73
363	H2030	RMC + 849 0.1	6	19673	141.316	12506.5	749.195	425.387	16383	12481.5	20578.5	13643.2	10678.6	6509.38	8316.53	22925.4	2784.99	28566.8	3001.9	2591.52	12784.6	31571.2	7079.79	16106.9	10259.9	5837.16	2963.13	6911.9	5034.15	9386.24	8673.26	11036.9	4447.07
364	H2030	RMC + 849 0.1	6	20681.6	123.347	13711.6	860.919	386.836	18920.5	12519	23861	12835.9	10807.5	25848.3	17712	28001.1	3604.72	28566.8	3432.35	5014.06	13932.8	33860.4	8151.85	17890	12531.5	5955.08	2375.59	7654.12	5250.09	9907.03	8078.81	12028.1	5094.93
365	H2030	RMC + 849 0.3	6	20931.3	93.3168	10861.7	778.991	378.04	17171.4	10678.6	19653.3	14750	10949	23388.5	15428.9	27446.7	3203.5	28853.9	4582.5	6620.99	13821.8	30946	10006.6	17257.5	12733.6	6210.52	3770.64	8578.38	5949.13	11327.6	8621.38	13467	5744.51
366	H2030	RMC + 849 0.3	6	22026.5	132.688	11707.7	869.571	421.155	17430.9	11778.1	20910.4	15724.9	11452.9	27173.6	8786.75	20373.7	3209.92	28282.5	5388.38	7331.97	12295.6	30031.4	9063.41	15490.8	12519	6502.88	3956.04	9461.63	6822.63	10352.7	9154.49	13904.9	6285.5
367	H2030	RMC+ 849 0.9	6	21311.5	104.585	11237.4	717.663	359.603	16797.7	10657.3	19168	14720.6	9956.69	25084.4	15740.6	25591.1	2628.06	28282.5	6191.92	7808.75	13213.6	30946	9867.48	15428.9	12456.5	5585.9	3065.6	8786.75	4929.54	11136.7	8225.55	11637.6	5524.79
368	H2030	RMC+ 849 0.9	6	21354.1	85.7126	12695.5	763.566	398.617	15724.9	10775.2	17765.3	13588.8	9163.65	20785.3	11248.6	24343	2363.74	26903.2	5250.09	6768.26	13174	33860.4	9117.95	15537.3	10593.5	5110.23	2261.99	7457.68	5727.3	9433.29	7230.04	14943	6342.32
369	H2030	RMC + 849 2.7	6	25336.5	134.559	11407.2	787.608	469.186	16317.6	11813.5	17361.3	14299.8	10425.4	27446.7	12823.1	28282.5	1704.45	32209	5698.74	7998.43	15260.2	35954.1	10219	17854.3	12209.9	5955.08	4113.38	6946.55	5569.16	12040.1	7547.71	18769.7	9172.82
370	H2030	RMC + 849 2.7	6	25848.3	130.974	12357.3	1033.8	428.375	19477.2	12606.9	19072.4	16932.7	12913.1	32532.7	20640.3	28282.5	1939.14	35242.2	6335.98	7623.57	14214.3	29143.9	9499.56	15138.6	13373.1	7115.28	5146.13	8484.53	7731.05	12823.1	9966.65	14458	6781.81
371	H2030	RMC + 849 8.1	6	24834.8	150.055	13333	842.185	455.32	15002.9	11282.4	14868.5	11920.3	9480.57	20211.3	7016.36	20030.3	1387.14	26370.5	4217.51	5854.7	12519	32209	8725.46	13739.1	9936.8	4984.06	3995.8	7339.31	5630.76	11361.7	8111.19	16564.2	6039.04
372	H2030	RMC + 849 8.1	6	24834.8	96.4476	10807.5	960.064	393.075	15306	12506.5	15214.4	11660.9	8690.62	18564.4	7808.75	22004.4	1359.67	26370.5	4703.21	5710.14	12619.5	32859.6	9072.47	13918.9	9376.86	4647.11	1868.7	6836.29	3367.75	12406.8	7715.61	17553.3	9154.49
373	H2030	RMC + 849 24	6	25084.4	131.368	9423.86	924.266	382.604	15677.8	11373	14764.8	11339	8450.66	19850.8	15428.9	30031.4	1655.73	34544.4	5558.04	7623.57	13974.6	31257.1	10208.7	18564.4	10168	6216.73	4637.82	7079.79	5345.44	13752.8	7646.48	18508.8	9946.74
374	H2030	RMC + 849 24	6	27173.6	109.727	10786	836.311	391.897	19187.2	12670.1	16415.8	15646.5	9976.63	23861	18807.3	29732.6	1806.24	35954.1	6118.06	7623.57	13134.5	26635.5	9643.12	18069.8	11350.3	7201.18	4587.08	8391.71	5530.31	16155.2	9828.09	18939.4	3203.5
375	H2030	RMC + 849 73	6	28853.9	117.097	10625.4	879.189	349.324	16366.6	11860.9	14676.5	13373.1	8973.22	19732.1	17068.7	28282.5	1425.1	31888.5	5286.97	6063.24	13534.5	29436.8	9798.65	15290.7	9662.42	6272.94	3983.83	8725.46	7072.72	13780.4	9117.95	14143.4	9423.86
376	H2030	RMC + 849 73	6	28001.1	108.419	9936.8	823.036	356.737	16465.1	11860.9	14898.3	12861.6	10710.7	17943.8	14809.1	28566.8	1326.1	32209	4750.47	5813.86	14750	32209	10006.6	16139.1	9986.6	6470.44	4600.87	7808.75	7966.49	13780.4	8151.85	16236.2	6707.62
377	H2030	Vistusertib	6	19168	114.32	15352	905.059	507.248	21418.3	14691.1	26903.2	13147.7	10583	7208.39	370.554	686.084	104820	28853.9	222.294	4183.9	1112.09	7331.97	1883.71	16252.5	17102.8	7785.36	2686.51	25591.1	9788.86	7009.35	8184.52	13160.8	4582.5
378	H2030	Vistusertib	6	19129.8	84.7749	14072.8	965.842	511.834	17465.8	13684.2	24343	11660.9	9623.85	7143.8	163.531	772.012	84120	29436.8	154.316	3190.71	1395.49	8258.51	1846.41	16350.3	16865.1	7480.09	1879.95	26903.2	10572.4	6136.44	7030.41	11556.5	5546.93
379	H2030	Vistusertib + 849 100nM	6	19034.3	166.501	18694.8	1004.25	519.05	20414.5	13918.9	18807.3	12544	9956.69	4084.68	79.3604	362.854	4707.91	32532.7	125.839	2344.91	1183.23	5681.67	2016.26	14853.6	14200	7079.79	2132.39	11271.1	6802.19	7093.96	8813.14	14853.6	7540.17
380	H2030	Vistusertib + 849 100nM	6	19341.3	200.137	13960.7	1015.36	492.256	20743.7	14299.8	18160.4	11475.8	8760.43	3763.11	153.392	446.75	4582.5	36680.5	109.508	2300.77	1269.02	7413.07	2217.2	19129.8	16139.1	7390.86	1493.68	12209.9	7669.45	6254.15	9837.93	12369.6	3842.97
381	H2030	Everolimus	6	15693.5	105.848	137310	962.948	493.242	21720.2	13918.9	26903.2	19110.6	10775.2	6884.31	335.627	978.48	43044.9	28566.8	6884.31	7143.8	8184.52	33189.9	5813.86	14115.1	15709.2	8673.26	3804.73	20723	9108.83	9986.6	9054.35	12606.9	4096.96
382	H2030	Everolimus	6	16564.2	52.5623	13279.8	827.161	433.547	16187.6	13213.6	25084.4	13213.6	10198.5	5967	218.547	842.185	56954	26370.5	6204.31	6870.55	8442.22	36680.5	5710.14	13306.4	14617.9	7871.47	2192.94	22925.4	9292.85	9018.2	7562.82	12185.5	5698.74
383	H2030	Everolimus + 849 100nM	6	16865.1	164.679	13918.9	872.184	541.314	18527.3	13904.9	19091.5	12246.6	10583	3611.94	167.001	598.245	2333.21	29732.6	3733.12	3744.34	8716.73	35954.1	5919.46	13974.6	13095.2	6254.15	2542.75	10087	7495.06	7769.8	8830.8	14072.8	8054.61
384	H2030	Everolimus + 849 100nM	6	17712	167.838	13588.8	880.949	573.065	19244.9	14958	19302.7	12695.5	10087	3885.47	182.363	672.499	2475.01	32209	3842.97	4060.25	9877.35	39735.5	6279.21	15677.8	13373.1	6727.78	2385.11	11452.9	6856.83	7331.97	8813.14	11568	3158.96
385	H2030	Vehicle	24	19129.8	260.604	13946.7	826.335	620.795	19890.5	14676.5	26635.5	18769.7	11136.7	35596.4	26108.1	31571.2	62317.6	32209	6707.62	4084.68	20353.3	27446.7	7465.15	17171.4	23623.6	14072.8	3248.67	22471.4	11521.8	6781.81	9672.09	11813.5	2184.19
386	H2030	Vehicle	24	19633.7	189.426	30638.1	1054.69	557.8	18920.5	14486.9	25848.3	16697.3	11170.1	28853.9	20516.8	30946	52052.1	31257.1	5843	2599.31	21205.2	31257.1	7692.49	17623.7	20826.9	11908.4	2522.49	21311.5	10949	5625.14	6891.2	10352.7	4285.53
387	H2030	849 0.1nM	24	23623.6	226.105	9877.35	896.95	625.155	17747.5	14357.1	22026.5	17997.7	11860.9	32209	14228.5	24834.8	43914.5	29143.9	3873.83	2878.43	19264.1	25848.3	6884.31	17326.6	19418.9	14200	1910.27	16983.5	16432.2	3408.41	7172.43	14171.7	4568.77
388	H2030	849 0.1nM	24	22925.4	202.755	10530.2	845.561	546.208	17500.8	13588.8	20272.1	16123	9857.62	22697.3	17500.8	30031.4	30946	31257.1	3401.6	1402.48	21015.2	28282.5	7585.55	18694.8	18251.5	14242.7	1478.82	17205.8	18453.3	3206.71	6260.4	12606.9	4276.97
389	H2030	849 0.3nM	24	23623.6	280.9	9191.19	824.684	556.129	18638.8	13056	20973.2	15772.1	10732.2	26635.5	17854.3	30638.1	33860.4	30333.2	3561.73	1846.41	20251.8	26635.5	7086.88	19516.2	19302.7	14101	2681.15	16747.4	14101	3733.12	5458.88	14838.8	2257.47
390	H2030	849 0.3nM	24	21807.3	184.749	8991.19	686.77	451.692	13521	12382	18379.7	13373.1	8655.93	26370.5	13643.2	27173.6	38561.1	26108.1	3415.23	2749.02	23623.6	32532.7	7887.22	19168	15048	11114.4	892.476	16915.7	11825.3	2366.1	2751.77	14429.1	5895.83
391	H2030	849 0.9nM	24	21162.8	187.729	10229.2	799.511	595.261	19555.3	15033	23623.6	17818.6	10850.9	20516.8	22697.3	31257.1	19457.7	30333.2	4793.42	1958.63	19516.2	25848.3	7179.61	17570.9	19811.1	11801.7	657.865	12708.2	11980.1	5049.28	7361.36	13946.7	2303.07
392	H2030	849 0.9nM	24	20931.3	239.607	9837.93	787.608	572.493	18545.8	14385.8	20723	15168.9	9996.6	16514.6	23388.5	33189.9	16010.5	30333.2	3842.97	1972.39	20394.1	28001.1	7562.82	19129.8	18844.9	11944.2	976.524	13082.1	13835.6	4023.87	5872.29	12283.4	2951.3
393	H2030	849 2.7nM	24	22026.5	242.742	10117.3	859.199	601.845	19930.4	15184	21120.5	16647.2	9966.65	18977.3	22247.8	31571.2	10721.4	32532.7	4577.92	2046.73	20211.3	27173.6	7832.21	18416.5	21504.1	11920.3	813.219	10949	10938	4442.62	5721.58	13548.1	1469.97
394	H2030	849 2.7nM	24	22026.5	243.471	9966.65	805.932	585.227	22697.3	15168.9	20952.2	15994.5	9604.63	19692.6	20272.1	32532.7	12493.9	32859.6	4587.08	2494.89	22471.4	30031.4	8578.38	19633.7	19244.9	11696	60.0994	11684.3	11579.6	3766.87	4302.71	12682.8	1793.64
395	H2030	849 8.1nM	24	19206.4	260.604	11637.6	897.847	612.776	19535.7	15184	20578.5	15914.7	9867.48	16139.1	22026.5	33860.4	5721.58	31257.1	5497.23	2904.45	19732.1	28853.9	7800.94	18583	17925.9	9897.13	671.155	7495.06	10363	5345.44	8484.53	15382.7	5074.58
396	H2030	849 8.1nM	24	19673	261.386	11742.9	887.138	584.058	19791.3	14764.8	19187.2	17102.8	11159	15740.6	19732.1	30638.1	5790.65	33189.9	5802.25	2573.44	16285	26108.1	7331.97	17943.8	19673	11092.2	2197.33	9172.82	9936.8	5100.02	8681.94	12990.8	3827.63
397	H2030	849 24nM	24	20619.7	367.969	12531.5	989.302	714.798	23388.5	16865.1	23155.8	18306.3	10383.8	29732.6	24343	32859.6	8595.55	35954.1	9376.86	7179.61	20578.5	28282.5	7540.17	20847.7	20764.5	11114.4	1408.1	10383.8	8209.11	5530.31	9000.18	15168.9	6654.18
398	H2030	849 24nM	24	21268.9	195.39	12088.4	949.561	588.16	23388.5	16614	23388.5	16074.7	9808.45	30946	20660.9	31888.5	9414.44	35242.2	9528.09	7654.12	21829.1	31888.5	7824.38	21396.9	18863.8	10290.7	1113.21	9740.04	9283.55	4577.92	6795.39	15199.2	3439.22
399	H2030	849 73nM	24	19950.3	255.443	13507.5	964.877	637.784	22471.4	15978.5	21525.6	17729.8	10818.4	25336.5	19890.5	27722.5	5825.5	34544.4	11626	8408.51	18939.4	28282.5	7723.32	19831	18882.7	9537.63	1861.24	9595.02	8135.56	6235.41	10764.4	12469	1775.79
400	H2030	849 73nM	24	19594.4	256.211	13413.3	1063.16	601.845	23155.8	16139.1	21547.2	17344	10614.8	23623.6	21850.9	29143.9	6229.18	37421.5	11214.9	8391.71	19870.7	30031.4	8014.44	18844.9	19574.8	9442.72	2447.93	9063.41	6795.39	5907.63	10467.2	13226.8	5937.24
401	H2030	Afatinib	24	19732.1	48.1345	14328.4	724.876	369.814	25591.1	10446.3	27446.7	20010.3	12456.5	19870.7	20312.7	28853.9	13808	37421.5	2507.4	4944.34	21960.5	31571.2	10321.7	19653.3	20764.5	10872.6	4150.57	13656.9	9218.8	9117.95	12064.2	15382.7	6431.74
402	H2030	Afatinib	24	19187.2	13.6536	14256.9	671.155	362.854	26108.1	10076.9	25336.5	18453.3	11649.3	14868.5	18398	27173.6	10498.6	37049.1	2050.83	3808.54	21184	31571.2	9672.09	18361.3	17570.9	10097.1	3364.38	12581.7	8349.86	7895.12	11305	15290.7	5508.24
403	H2030	Afat + 849 0.1	24	17908	18.1923	14171.7	758.24	423.266	21099.4	11556.5	24100.8	15946.6	10363	14824	13507.5	24343	7738.79	30946	1474.39	2992.9	17465.8	30031.4	8982.2	17588.5	18142.3	9163.65	2542.75	12149	9009.19	7631.19	9926.87	12657.4	1517.77
404	H2030	Afat + 849 0.1	24	19129.8	18.1923	14972.9	854.913	423.266	21418.3	11579.6	24100.8	16697.3	10572.4	14443.5	15184	25336.5	8734.18	31571.2	1539.17	2807.36	19930.4	31257.1	9691.46	17997.7	18324.6	9090.63	2237.24	12939	8324.85	6747.99	9720.58	14400.2	7302.7
405	H2030	Afat + 849 0.3	24	18958.4	32.9833	14486.9	839.662	416.131	20785.3	11271.1	23155.8	16647.2	10796.7	13333	13752.8	23861	6788.6	32859.6	1371.97	2583.76	18601.6	31888.5	10036.7	17836.5	18713.5	9461.63	2916.09	12161.1	9701.16	6535.47	10551.3	13240	2151.67
406	H2030	Afat + 849 0.3	24	19322	13.6399	14530.4	724.151	378.04	22247.8	11568	24343	16747.4	10301	14357.1	11591.2	24100.8	8493.02	33523.4	1443.75	2697.28	19457.7	34200.6	10127.4	17800.8	18306.3	9237.25	2081.82	12173.3	9691.46	6425.31	10625.4	14958	6412.47
407	H2030	Afat + 849 0.9	24	17925.9	22.4659	13877.2	691.595	423.266	19910.5	10721.4	21829.1	13480.5	10026.6	10850.9	10239.4	23155.8	4019.85	27722.5	1319.49	2936.58	16333.9	33189.9	9490.06	15459.8	16220	8946.34	2581.17	9228.02	8391.71	7259.02	10198.5	11778.1	3324.25
408	H2030	Afat + 849 0.9	24	14371.5	56.0363	13946.7	746.205	431.385	25591.1	12823.1	24834.8	20516.8	13904.9	12076.3	14853.6	25591.1	4545.99	35954.1	1970.42	4092.86	18453.3	30031.4	10178.2	15882.9	20110.6	10208.7	5208.25	13108.3	12271.1	8493.02	12234.3	15108.3	7030.41
409	H2030	Afat + 849 2.7	24	17943.8	55.9803	14143.4	740.999	403.832	19496.7	10872.6	21247.6	15506.3	11192.5	9877.35	7324.65	19457.7	2919.01	32209	1185.6	2754.52	16220	32859.6	10046.7	15229.7	17448.3	8006.43	3197.1	9976.63	8459.12	7808.75	12271.1	13548.1	504.718
410	H2030	Afat + 849 2.7	24	17518.3	12.5912	13960.7	657.865	416.547	21763.7	11092.2	21960.5	15033	9595.02	10818.4	7065.65	19732.1	4204.88	33523.4	1319.49	2919.01	17205.8	35596.4	10614.8	16647.2	17361.3	7879.35	2102.75	10689.3	8308.21	7058.59	10840	13891	6093.64
411	H2030	Afat + 849 8.1	24	18306.3	15.7525	12810.2	687.457	363.217	18788.5	10016.6	17396.1	12406.8	8919.54	8176.34	3808.54	14617.9	2421.15	28282.5	1219.26	2798.95	14314.1	36315.5	9916.94	16597.4	12519	5574.74	1878.07	7700.19	6431.74	7016.36	8928.47	12913.1	4944.34
412	H2030	Afat + 849 8.1	24	18732.2	17.5315	17553.3	837.147	386.449	24834.8	10657.3	20599	15290.7	9996.6	8544.14	6105.83	17800.8	2678.47	35954.1	1484.75	3418.65	16514.6	33860.4	10668	16171.4	15017.9	7331.97	2960.16	9009.19	6714.34	8510.02	12708.2	15819.5	4096.96
413	H2030	Afat + 849 24	24	18863.8	41.888	14242.7	706.978	393.862	24100.8	10198.5	19148.9	15428.9	10219	8604.15	6555.11	18269.7	2462.67	37049.1	1472.92	2972.03	17120	33523.4	10689.3	17017.5	15787.9	7990.43	2989.92	9218.8	6754.74	7879.35	12136.8	14588.7	7903.02
414	H2030	Afat + 849 24	24	19574.8	19.8261	14632.5	763.566	387.998	27446.7	10742.9	21057.2	17085.8	10872.6	10239.4	6457.51	17257.5	2892.86	38177.4	1501.17	2966.09	15914.7	31888.5	9828.09	16547.7	15677.8	8119.31	2654.47	9433.29	5990.92	8022.46	11754.6	14314.1	5819.67
415	H2030	Afat + 849 73	24	18361.3	10.7618	14429.1	653.93	359.603	21290.1	10572.4	20475.8	12746.3	9237.25	8030.48	4496.26	15584	2040.6	28566.8	1391.31	3354.31	14414.6	30946	8308.21	16814.5	11510.3	5292.26	1611.63	5110.23	4192.28	11373	8233.77	11103.3	2255.21
416	H2030	Afat + 849 73	24	18788.5	37.5999	15290.7	699.944	395.836	25848.3	11125.6	22247.8	15630.8	10208.7	10026.6	6502.88	16630.6	2578.6	34891.6	1627.82	3561.73	15506.3	28566.8	8358.21	17205.8	14002.6	6911.9	2275.6	5884.05	5431.66	10981.9	11395.8	16187.6	5271.13
417	H2030	RMC	24	21057.2	250.385	14647.1	944.825	527.949	19692.6	13684.2	25591.1	17205.8	10970.9	22004.4	21807.3	28853.9	5151.28	30333.2	11731.1	11248.6	19496.7	29436.8	6836.29	16915.7	15244.9	7700.19	3561.73	8135.56	7251.76	10657.3	8168.17	13187.2	7044.48
418	H2030	RMC	24	20640.3	266.667	13960.7	842.185	590.518	23155.8	14588.7	28566.8	18920.5	10625.4	31257.1	25336.5	28566.8	7593.14	35954.1	16268.7	17085.8	21655.2	29436.8	7631.19	18015.7	17257.5	9339.43	3995.8	9265.01	7738.79	10604.1	8991.19	14458	3459.92
419	H2030	RMC + 849 0.1	24	19910.5	288.011	13849.4	801.913	540.233	21633.5	14016.6	25848.3	16747.4	10363	22925.4	27722.5	29732.6	4846.44	33860.4	12519	11908.4	21205.2	30031.4	7450.23	17623.7	16448.7	8708.02	4088.77	8242.02	7731.05	9769.3	10657.3	14647.1	6075.38
420	H2030	RMC + 849 0.1	24	20090.5	300.967	14545	846.407	570.207	24343	14357.1	27446.7	17430.9	10970.9	24100.8	24587.7	27722.5	5825.5	32859.6	11908.4	11813.5	20994.2	27722.5	7302.7	16814.5	15851.2	8527.06	2641.23	8283.33	6721.05	9623.85	10689.3	15835.4	5721.58
421	H2030	RMC + 849 0.3	24	21461.2	178.395	138691	931.69	522.696	21829.1	12619.5	23155.8	62317.6	9808.45	24100.8	16697.3	26903.2	4179.72	28001.1	15229.7	16797.7	16865.1	25336.5	7108.17	15398.1	14429.1	7158.1	3729.39	7016.36	5878.16	12431.6	10107.2	15306	7457.68
422	H2030	RMC + 849 0.3	24	22471.4	209.558	13918.9	863.505	534.323	20806.1	12823.1	23388.5	14472.4	8612.76	20434.9	14086.9	25591.1	4367.74	28566.8	13932.8	16139.1	19053.4	29436.8	7646.48	16123	13480.5	7016.36	4307.01	7532.63	7863.6	10657.3	8751.67	14705.8	4959.2
423	H2030	RMC+ 849 0.9	24	21676.9	170.375	18434.9	2475.01	550.595	25336.5	12784.6	21785.5	14603.3	7777.57	15138.6	13453.6	18106	2768.33	24834.8	11282.4	18694.8	9509.06	23623.6	9575.85	14824	8510.02	5744.51	2829.91	5653.33	5399.17	13656.9	12606.9	16268.7	9172.82
424	H2030	RMC+ 849 0.9	24	22697.3	262.434	11544.9	839.662	542.941	23155.8	12939	22471.4	15930.6	9857.62	22697.3	16983.5	26370.5	3979.85	32532.7	15584	17154.2	20455.3	30638.1	8030.48	16966.6	13891	8006.43	2866.94	7368.72	5925.38	9986.6	9779.07	15677.8	8839.63
425	H2030	RMC + 849 2.7	24	26370.5	216.589	12016.1	914.155	582.308	20434.9	14414.6	22026.5	17465.8	10721.4	24834.8	19302.7	28282.5	2710.8	32859.6	21960.5	23623.6	18977.3	27173.6	7715.61	15709.2	13293.1	7273.55	4060.25	8006.43	7244.51	13108.3	10894.3	19870.7	9036.26
426	H2030	RMC + 849 2.7	24	25084.4	226.784	12088.4	891.585	537.001	19438.3	13575.2	21268.9	16714	10394.2	23155.8	16898.8	26635.5	2810.17	33860.4	20373.7	24343	20785.3	29732.6	8184.52	16171.4	13629.6	7562.82	4740.98	7435.34	8070.74	11860.9	9063.41	16983.5	6418.89
427	H2030	RMC + 849 8.1	24	25591.1	252.649	10872.6	895.158	560.035	19516.2	13240	18844.9	15260.2	10456.7	17257.5	13918.9	28566.8	2004.2	33523.4	15677.8	12419.2	20702.3	32209	9154.49	16966.6	14002.6	7237.28	3991.81	7608.34	8518.54	10938	10509.1	18583	11226.1
428	H2030	RMC + 849 8.1	24	21205.2	207.473	10818.4	681.298	444.967	16697.3	10959.9	15367.3	10467.2	7295.41	12394.4	10425.4	23623.6	1968.45	25848.3	13003.8	10404.6	19015.3	31888.5	7785.36	15693.5	10026.6	6694.22	2004.2	5324.11	4591.67	9614.23	10959.9	18453.3	11159
429	H2030	RMC + 849 24	24	28566.8	269.078	10604.1	873.93	482.992	18527.3	12835.9	17274.7	13684.2	10593.5	14357.1	13226.8	29436.8	1751.1	33860.4	13739.1	11556.5	18713.5	30333.2	8848.47	16350.3	11980.1	7230.04	7115.28	9099.73	9916.94	13095.2	9145.35	18087.9	7654.12
430	H2030	RMC + 849 24	24	28566.8	294.418	11136.7	827.161	486.385	17188.6	12990.8	17068.7	13319.7	9769.3	15048	13988.6	29143.9	1595.59	34200.6	13373.1	11159	19072.4	31257.1	9045.29	17017.5	12581.7	7793.15	7136.66	8324.85	10646.6	12531.5	8638.64	17344	6918.82
431	H2030	RMC + 849 73	24	27446.7	294.418	10219	820.571	584.642	18324.6	14414.6	17034.6	12964.9	10540.7	15537.3	13426.7	28566.8	1826.21	33189.9	13697.9	12394.4	18508.8	29732.6	8535.59	15756.4	13426.7	7700.19	7615.95	9808.45	10551.3	13739.1	11271.1	18527.3	10415
432	H2030	RMC + 849 73	24	25336.5	243.228	10006.6	762.041	554.463	15962.5	13616	16350.3	11475.8	8527.06	14030.7	16848.2	36315.5	2547.84	40134.9	15367.3	13534.5	23861	40134.9	10646.6	22925.4	14458	9461.63	9009.19	12295.6	10137.5	12271.1	10488.1	20010.3	6674.17
433	H2030	Vistusertib	24	17309.3	170.034	16564.2	805.127	550.045	20931.3	15537.3	26108.1	10137.5	9311.45	6136.44	240.808	545.117	92042	30638.1	526.894	16415.8	1968.45	11754.6	2312.3	14559.5	18087.9	9063.41	4285.53	24100.8	8604.15	11849	10117.3	13121.4	4411.63
434	H2030	Vistusertib	24	16220	94.7271	16831.4	667.808	594.666	16498.1	14617.9	24100.8	6960.45	6451.06	4707.91	126.09	268.54	52575.2	19187.2	366.134	8022.46	1540.71	8760.43	1853.81	9847.76	12320.3	6620.99	2065.24	16350.3	6502.88	13849.4	7715.61	10066.8	5244.84
435	H2030	Vistusertib + 849 100nM	24	15630.8	280.9	26903.2	735.095	631.438	19264.1	15693.5	18251.5	7158.1	6355.02	3121.28	93.5036	216.805	3232.47	23861	232.061	7600.73	1099.93	7577.96	1707.87	12481.5	12246.6	5698.74	2223.86	8518.54	5574.74	11025.9	7115.28	12606.9	9027.22
436	H2030	Vistusertib + 849 100nM	24	16301.3	249.635	16106.9	766.627	645.484	18545.8	15819.5	17997.7	6002.91	6235.41	3226.01	153.7	248.142	3721.94	26370.5	232.525	7840.05	1257.65	8699.32	2036.52	14256.9	13187.2	6348.66	2411.49	8928.47	8006.43	9808.45	9936.8	12136.8	4088.77
437	H2030	Everolimus	24	18751	164.35	14472.4	818.112	478.186	22004.4	13849.4	28001.1	13808	12088.4	6304.38	394.65	522.173	67507.9	33523.4	3459.92	11418.6	14676.5	35954.1	6489.88	17553.3	15994.5	8964.25	4129.87	20931.3	9395.63	8708.02	10689.3	15898.8	7158.1
438	H2030	Everolimus	24	21311.5	127.74	15367.3	905.059	453.502	20030.3	13440.1	25848.3	13174	11339	6393.26	197.749	525.842	80017.4	34200.6	3699.67	11992.1	15352	39735.5	6640.88	18471.8	17448.3	8973.22	3026.01	22925.4	8442.22	6483.4	9837.93	13147.7	4138.13
439	H2030	Everolimus + 849 100nM	24	19950.3	292.364	15506.3	966.808	613.39	26903.2	16090.8	23861	13821.8	11754.6	4289.82	130.321	230.904	5361.5	41772.8	3071.74	10239.4	14913.2	32532.7	6399.66	17000.5	16564.2	9009.19	2665.11	11293.7	5925.38	7661.78	11860.9	14058.7	5642.03
440	H2030	Everolimus + 849 100nM	24	18676.1	264.542	16881.9	926.116	519.05	23861	16090.8	22697.3	12784.6	9604.63	4491.76	193.834	219.203	4442.62	39735.5	2957.21	9480.57	15930.6	34544.4	6298.08	17783	15978.5	8708.02	2460.21	10840	6843.13	8333.18	11849	14357.1	4661.07
441	H2030	Vehicle	72	19110.6	170.034	14228.5	873.93	599.442	21184	15946.6	23155.8	15898.8	10807.5	13684.2	28566.8	34544.4	14044.7	34200.6	799.511	1312.91	22925.4	31888.5	8349.86	16514.6	27446.7	11766.4	1631.08	24343	12209.9	5475.29	9877.35	12926.1	7172.43
442	H2030	Vehicle	72	18713.5	221.185	14559.5	815.662	491.273	21015.2	15851.2	22925.4	15275.4	9027.22	13877.2	27173.6	34544.4	16042.5	33523.4	919.656	1069.56	24100.8	32209	8160	16498.1	27173.6	11147.8	923.342	24343	11316.3	5733.03	9537.63	12283.4	3105.72
443	H2030	849 0.1nM	72	21611.9	210.819	126754	955.276	600.642	18306.3	15260.2	15521.8	18342.9	10938	10404.6	30333.2	35596.4	5602.68	34891.6	384.137	503.206	22247.8	28853.9	8673.26	21785.5	20211.3	11920.3	962.948	19732.1	18996.3	3354.31	4163.03	14414.6	2838.41
444	H2030	849 0.1nM	72	21916.6	98.2976	8821.97	994.261	572.493	15882.9	12746.3	15882.9	12100.5	9191.19	11136.7	19791.3	33189.9	10363	32532.7	547.849	655.239	23623.6	34544.4	8883.94	22026.5	20578.5	9740.04	324.083	20211.3	18713.5	2721.67	4909.85	12784.6	313.877
445	H2030	849 0.3nM	72	22471.4	230.212	8883.94	948.612	567.363	15275.4	14705.8	15568.4	11464.4	10219	11237.4	20272.1	34891.6	9265.01	31888.5	562.843	1597.19	22925.4	33523.4	8176.34	21547.2	20110.6	9358.12	2197.33	19831	20660.9	3558.16	5361.5	12708.2	1866.84
446	H2030	849 0.3nM	72	24587.7	233.925	10425.4	1017.39	569.068	15552.9	15882.9	17068.7	13134.5	9330.09	12344.9	21982.5	35242.2	10786	32209	696.453	496.21	23388.5	32532.7	8030.48	22471.4	20640.3	10301	1401.08	20353.3	18958.4	3637.31	5297.55	16074.7	5949.13
447	H2030	849 0.9nM	72	20010.3	160.935	10905.3	965.842	600.042	19831	15882.9	19091.5	12835.9	8681.94	10446.3	20973.2	31257.1	9163.65	31571.2	1307.67	665.142	20050.3	28853.9	8078.81	19692.6	20030.3	9246.5	367.234	16366.6	13187.2	5135.85	4113.38	14868.5	3640.95
448	H2030	849 0.9nM	72	19930.4	177.505	10850.9	900.545	542.398	19302.7	15787.9	17483.3	12823.1	8875.05	9575.85	20952.2	30031.4	6911.9	31888.5	1021.47	406.263	18732.2	27173.6	7339.31	17765.3	19831	9367.49	69.4078	16090.8	12913.1	4999.04	5491.74	12456.5	3307.67
449	H2030	849 2.7nM	72	20557.9	251.892	10593.5	907.778	655.239	18844.9	16252.5	18826.1	12632.1	10087	10959.9	19206.4	31257.1	7570.39	31257.1	1429.39	881.831	19692.6	28566.8	7165.26	18160.4	19380.1	10147.7	757.482	16317.6	14101	5049.28	5255.34	11637.6	1037.95
450	H2030	849 2.7nM	72	23155.8	234.628	11203.7	934.489	758.999	19950.3	17171.4	18977.3	13373.1	9414.44	11203.7	21057.2	33860.4	6654.18	34544.4	1412.34	1030.71	20496.3	30031.4	7661.78	20353.3	21720.2	10415	1226.6	17465.8	13863.3	5255.34	6489.88	13711.6	2052.88
451	H2030	849 8.1nM	72	20150.8	194.805	12456.5	922.42	617.698	22471.4	17500.8	20764.5	13319.7	8760.43	10753.6	20455.3	31257.1	5949.13	35596.4	2708.09	1179.68	19418.9	30031.4	7615.95	20952.2	18977.3	7832.21	299.466	14588.7	11498.8	5513.75	8275.05	14574.1	4750.47
452	H2030	849 8.1nM	72	21850.9	231.829	13521	950.511	649.368	22697.3	17747.5	22247.8	16663.9	10519.6	12556.6	26108.1	33523.4	9200.38	36315.5	3334.24	895.158	20455.3	28853.9	7465.15	21611.9	23861	9808.45	741.741	17102.8	12004.1	4793.42	9652.77	18379.7	6039.04
453	H2030	849 24nM	72	21247.6	223.408	12295.6	888.914	775.106	20414.5	17800.8	20952.2	13575.2	9996.6	13711.6	19574.8	32859.6	9547.17	34891.6	4084.68	1402.48	18471.8	29732.6	7201.18	20110.6	20496.3	8046.56	695.757	16797.7	12619.5	5404.57	9681.77	14129.2	5585.9
454	H2030	849 24nM	72	22697.3	275.889	13029.9	1023.52	713.37	21141.6	18583	20414.5	11849	8501.52	11081.1	19692.6	34200.6	7165.26	38948.7	3644.59	1276.66	20090.5	33523.4	7926.76	21807.3	22026.5	8612.76	841.344	17836.5	16090.8	5286.97	10786	13794.1	5004.03
455	H2030	849 73nM	72	20702.3	277.827	15033	1006.26	691.595	26108.1	19418.9	22247.8	17997.7	11766.4	14357.1	25084.4	29143.9	7237.28	40134.9	7361.36	2746.27	17448.3	26903.2	7450.23	18977.3	21720.2	8919.54	1475.87	17051.6	10467.2	6216.73	11070.1	12481.5	4661.07
456	H2030	849 73nM	72	22247.8	251.389	14545	1011.31	681.98	22697.3	17588.5	22925.4	16203.8	10721.4	14200	20251.8	28566.8	8964.25	40134.9	8151.85	2779.43	18939.4	30638.1	7855.74	18545.8	22247.8	8459.12	954.321	19732.1	10721.4	4798.22	11014.9	14285.5	5919.46
457	H2030	Vistusertib	72	23388.5	130.191	15930.6	789.184	414.056	22471.4	15851.2	29143.9	10208.7	10905.3	7037.44	468.249	472.955	124244	35596.4	1098.83	37049.1	1770.47	18251.5	2790.57	16350.3	15962.5	7510.07	3480.74	19053.4	7376.1	9837.93	10540.7	13095.2	7731.05
458	H2030	Vistusertib	72	21461.2	113.409	14691.1	815.662	436.156	19034.3	14632.5	25591.1	8875.05	9867.48	6045.08	66.155	375.403	110194	34200.6	791.555	25336.5	1564	14414.6	2149.52	15093.2	15184	6754.74	3118.17	17997.7	7800.94	9358.12	10147.7	12481.5	10775.2
459	H2030	Vistusertib + 849 100nM	72	20434.9	186.98	30946	890.693	493.736	23623.6	15552.9	22925.4	8374.95	8184.52	6266.67	87.1822	152.627	17361.3	32209	812.406	32532.7	970.683	13399.9	1958.63	13266.5	12861.6	6304.38	2751.77	10764.4	5872.29	11849	12161.1	11081.1	6087.54
460	H2030	Vistusertib + 849 100nM	72	21938.5	190.376	16898.8	1032.77	646.776	27173.6	17223	24834.8	9575.85	9136.2	6008.92	124.961	179.648	22471.4	40538.2	881.831	36315.5	1202.31	14486.9	2303.07	16350.3	15552.9	7942.63	2591.52	12657.4	5229.13	13426.7	12357.3	14016.6	6355.02
461	H2030	Everolimus	72	23623.6	104.794	12951.9	898.746	483.959	20910.4	13877.2	27722.5	12759.1	11944.2	9200.38	189.995	389.553	84120	38948.7	5608.28	14414.6	16074.7	35242.2	6463.98	16498.1	16301.3	8425.34	3850.66	19187.2	9414.44	9499.56	11361.7	15693.5	9461.63
462	H2030	Everolimus	72	21311.5	150.355	12332.6	791.555	486.385	18882.7	14143.4	25591.1	11992.1	10593.5	7108.17	200.537	569.637	81633.9	38561.1	5034.15	13069	16123	34544.4	6355.02	15962.5	15568.4	8527.06	3816.16	19244.9	9595.02	9154.49	10604.1	15882.9	8552.68
463	H2030	Everolimus + 849 100nM	72	22697.3	234.862	12670.1	945.771	508.772	22026.5	15244.9	22471.4	10732.2	9710.86	6457.51	186.233	460.356	34544.4	49513.5	7065.65	28566.8	15063	41357.1	7631.19	19890.5	17223	8484.53	4117.49	15336.6	7950.58	9191.19	13082.1	16106.9	7684.8
464	H2030	Everolimus + 849 100nM	72	23623.6	305.515	13187.2	1144.82	507.248	21504.1	15506.3	23388.5	10894.3	9847.76	6444.61	138.379	323.436	30638.1	43914.5	5675.99	24834.8	12861.6	37797.6	6654.18	17979.7	14958	6707.62	2927.78	13042.9	7037.44	9490.06	10311.3	12519	9218.8
465	H2122	Vehicle	6	23388.5	55.1469	14285.5	801.913	523.219	16865.1	12258.8	37049.1	25848.3	38561.1	16415.8	31257.1	36680.5	15290.7	22471.4	19091.5	7982.44	39340.1	37797.6	25084.4	18713.5	30031.4	92042	17783	14530.4	7251.76	4969.13	4949.29	15153.7	3881.59
466	H2122	Vehicle	6	21057.2	112.843	12797.4	728.509	552.802	15490.8	11384.4	33860.4	19072.4	31571.2	12234.3	30333.2	34891.6	15260.2	21763.7	17570.9	8493.02	36680.5	38948.7	23861	19015.3	29436.8	89321.7	16663.9	15382.7	7661.78	4934.47	5458.88	12746.3	3952.09
467	H2122	849 0.1nM	6	27722.5	135.639	10829.2	953.367	659.182	14987.9	12124.7	35596.4	22471.4	43044.9	16448.7	32532.7	43914.5	14157.5	22697.3	17326.6	8143.7	41357.1	38948.7	29436.8	24343	30638.1	94845.1	17257.5	14898.3	12197.7	4433.75	1811.66	15352	4.53999e-05
468	H2122	849 0.1nM	6	26370.5	206.851	10208.7	943.881	614.003	14314.1	11271.1	32859.6	20516.8	37049.1	13521	30031.4	37797.6	12258.8	22247.8	15490.8	6451.06	37049.1	35954.1	28001.1	21120.5	28853.9	89321.7	15851.2	12913.1	11487.3	3897.15	6130.3	11568	12746.3
469	H2122	849 0.3nM	6	28853.9	119.224	10700	948.612	690.213	15568.4	11884.6	31571.2	24834.8	43477.6	13918.9	33189.9	39340.1	8612.76	25084.4	12644.8	4964.16	35954.1	33860.4	25848.3	20619.7	28282.5	93901.3	20619.7	17068.7	15630.8	4550.54	6721.05	13200.4	1183.23
470	H2122	849 0.3nM	6	27446.7	179.469	10700	1005.26	564.534	13575.2	12209.9	30946	20619.7	37797.6	12695.5	29436.8	38561.1	9740.04	23388.5	13306.4	5464.35	39735.5	38177.4	27446.7	20150.8	25591.1	89321.7	19341.3	14735.3	18434.9	4183.9	3405	14414.6	1791.84
471	H2122	849 0.9nM	6	25591.1	103.855	12016.1	779.771	599.442	17102.8	12295.6	34891.6	24343	37421.5	11672.6	31257.1	38561.1	7585.55	21894.7	16848.2	7562.82	37049.1	35596.4	27173.6	22247.8	29143.9	87553	15290.7	11731.1	7950.58	5004.03	1305.05	12283.4	3835.29
472	H2122	849 0.9nM	6	24834.8	125.086	11203.7	919.656	512.346	14853.6	12874.5	32859.6	19302.7	33189.9	10938	25084.4	37049.1	8242.02	19673	13697.9	6960.45	39340.1	40538.2	28001.1	21785.5	26370.5	82454.3	13932.8	10818.4	8316.53	4158.88	1362.4	10056.8	1610.02
473	H2122	849 2.7nM	6	26903.2	144.604	11533.4	854.059	511.322	15851.2	12784.6	32209	21916.6	37797.6	11248.6	24100.8	35596.4	5591.48	21162.8	15867.1	6775.04	38561.1	38177.4	27722.5	21742	28566.8	84120	15914.7	10097.1	9348.77	4861	1889.37	9556.72	514.399
474	H2122	849 2.7nM	6	26903.2	47.3232	15693.5	902.348	607.286	15772.1	12382	33860.4	22247.8	38177.4	12064.2	26635.5	36680.5	6911.9	21015.2	16848.2	9237.25	38948.7	39735.5	29143.9	22471.4	29436.8	89321.7	16680.6	13069	9452.18	4582.5	1800.82	10066.8	403.026
475	H2122	849 8.1nM	6	25848.3	44.7012	13534.5	919.656	639.7	18398	14299.8	29732.6	21247.6	36315.5	9246.5	29143.9	41772.8	2686.51	25848.3	16026.5	6687.53	40945.6	40945.6	30638.1	25848.3	30031.4	91126.1	16026.5	7331.97	5297.55	4846.44	2519.96	14016.6	6809
476	H2122	849 8.1nM	6	24343	114.32	12161.1	825.509	512.346	16042.5	12357.3	27446.7	19614	32209	8544.14	24587.7	35954.1	2479.97	23388.5	15078.1	8135.56	37797.6	40945.6	29732.6	21960.5	27722.5	81633.9	14958	7230.04	7310.01	3839.13	2670.44	12064.2	3197.1
477	H2122	849 24nM	6	24834.8	193.253	13319.7	1027.62	553.355	16597.4	12964.9	23388.5	19225.6	35242.2	7093.96	21078.3	31888.5	1735.41	23155.8	9749.78	5756.01	34544.4	36680.5	26108.1	21807.3	25848.3	80017.4	14299.8	6849.97	6298.08	5197.85	3184.34	13174	2333.21
478	H2122	849 24nM	6	23388.5	81.6956	12581.7	779.771	670.484	15033	11731.1	23388.5	16848.2	30333.2	7009.35	17570.9	30333.2	1842.72	20702.3	10807.5	7023.38	37421.5	42616.6	28001.1	20660.9	25848.3	72402.8	12444.1	5967	8604.15	4600.87	2771.1	11498.8	3842.97
479	H2122	849 73nM	6	23155.8	159.493	14764.8	940.113	603.05	17430.9	13306.4	23623.6	20455.3	33523.4	8690.62	22026.5	35954.1	1826.21	24587.7	16106.9	9386.24	39340.1	43044.9	29436.8	22247.8	29143.9	76879.9	15108.3	6406.06	5848.85	4731.51	4929.54	15199.2	7339.31
480	H2122	849 73nM	6	21763.7	104.794	13121.4	852.352	530.065	15962.5	11637.6	22697.3	19791.3	29143.9	8839.63	17017.5	28853.9	1929.47	22026.5	17800.8	11350.3	36680.5	41357.1	28282.5	20130.7	27722.5	72402.8	13213.6	6057.18	4642.46	4238.65	4380.86	11825.3	5779.08
481	H2122	Afatinib	6	20434.9	95.4879	14603.3	697.15	426.239	17396.1	10259.9	30946	17154.2	35242.2	7990.43	19990.2	34544.4	7863.6	20806.1	10593.5	6483.4	41357.1	45706.7	28853.9	21268.9	22026.5	72402.8	13399.9	9136.2	3793.33	5049.28	6904.99	15521.8	5675.99
482	H2122	Afatinib	6	20010.3	129.671	14501.4	695.757	460.356	16898.8	9897.13	33860.4	18015.7	35596.4	9537.63	17747.5	33860.4	11214.9	20475.8	12531.5	9072.47	43477.6	49513.5	30031.4	21742	22471.4	74607.8	13453.6	11214.9	4268.43	4895.15	6002.91	12556.6	4665.73
483	H2122	Afat + 849 0.1	6	18434.9	64.7802	16383	673.845	620.795	16730.7	12456.5	36315.5	16252.5	26903.2	11766.4	20537.3	34200.6	14342.8	16630.6	12835.9	10477.7	38177.4	40945.6	21655.2	17872.2	26370.5	73130.4	14242.7	12619.5	7150.95	8425.34	5276.4	15851.2	10208.7
484	H2122	Afat + 849 0.1	6	18251.5	61.7442	15898.8	774.331	557.8	16187.6	13643.2	34544.4	15630.8	27446.7	10259.9	16597.4	29732.6	14515.9	16814.5	11203.7	7887.22	35954.1	41357.1	22697.3	16614	24100.8	72402.8	13226.8	11731.1	5329.43	7222.82	4541.44	11181.3	6620.99
485	H2122	Afat + 849 0.3	6	19380.1	76.7076	15244.9	699.244	545.117	16317.6	12708.2	35954.1	19072.4	31571.2	10949	18732.2	29732.6	12606.9	18416.5	13904.9	7871.47	35242.2	38177.4	23388.5	16399.4	25591.1	76879.9	14342.8	12419.2	5860.56	7072.72	4984.06	12606.9	5597.08
486	H2122	Afat + 849 0.3	6	17326.6	131.105	16106.9	690.213	560.035	15459.8	13656.9	33523.4	17483.3	29732.6	9063.41	17535.8	27722.5	11884.6	18142.3	13147.7	8699.32	31571.2	36315.5	20537.3	15153.7	22925.4	73130.4	13333	10239.4	5808.05	8955.3	4596.27	10970.9	4394.02
487	H2122	Afat + 849 0.9	6	15306	61.9297	15835.4	636.51	563.969	15352	12784.6	31257.1	13359.7	25084.4	5990.92	12848.7	29732.6	5491.74	14632.5	8333.18	6124.18	32859.6	40134.9	19890.5	15740.6	19970.3	59278.4	11766.4	7855.74	4929.54	11441.5	6335.98	12964.9	10259.9
488	H2122	Afat + 849 0.9	6	17641.3	14.3823	15946.6	704.156	517.495	16481.6	13069	32859.6	16481.6	30946	7030.41	18106	30333.2	7288.11	18033.7	10425.4	6654.18	33189.9	40134.9	21894.7	15851.2	21633.5	69563.8	13629.6	8813.14	5340.1	8160	5250.09	11418.6	8374.95
489	H2122	Afat + 849 2.7	6	17257.5	91.6521	15772.1	647.423	508.772	16448.7	12519	30333.2	16730.7	30638.1	6099.73	16448.7	29436.8	3344.26	17430.9	8535.59	4113.38	33860.4	38561.1	22247.8	15244.9	21525.6	66836.2	12320.3	6741.25	4138.13	8621.38	5563.59	13494	4451.52
490	H2122	Afat + 849 2.7	6	18583	133.087	15584	699.944	592.885	17800.8	13213.6	30031.4	15787.9	31571.2	5552.48	19516.2	31257.1	3022.98	19574.8	8299.91	3718.22	34544.4	39735.5	23861	16465.1	24100.8	73865.4	13725.4	6884.31	6167.2	8127.43	6393.26	14328.4	6607.76
491	H2122	Afat + 849 8.1	6	17240.2	110.057	14868.5	706.272	501.197	17205.8	11181.3	25336.5	14299.8	26903.2	3916.68	13863.3	30333.2	1929.47	18434.9	8742.93	5271.13	32859.6	41357.1	24834.8	17979.7	20931.3	60475.9	12746.3	5502.73	4064.31	8892.83	7143.8	12004.1	9200.38
492	H2122	Afat + 849 8.1	6	17257.5	4.53999e-05	15199.2	622.037	452.596	16531.1	11908.4	24834.8	12887.3	26108.1	3924.52	12161.1	28282.5	1549.98	18306.3	7608.34	4491.76	36315.5	44801.6	25336.5	18087.9	19438.3	58688.5	11395.8	4447.07	3090.23	7510.07	5796.44	12369.6	3152.65
493	H2122	Afat + 849 24	6	17465.8	79.4398	13960.7	697.847	450.789	14943	11361.7	19811.1	12173.3	24834.8	3491.2	8857.32	24100.8	1140.25	16663.9	5597.08	3498.19	32859.6	44355.8	24100.8	16203.8	16647.2	48533	9585.44	4031.93	3140.07	7346.66	5931.31	13253.3	5377.61
494	H2122	Afat + 849 24	6	17854.3	111.163	15260.2	642.264	625.781	16203.8	11316.3	22925.4	13480.5	25084.4	3401.6	9302.14	24587.7	1504.18	18306.3	6438.18	4015.83	34891.6	45251.9	25336.5	16730.7	17890	53103.6	10446.3	3987.82	3197.1	7887.22	5972.97	13821.8	4870.74
495	H2122	Afat + 849 73	6	18033.7	42.7342	15093.2	666.473	475.801	16983.5	10905.3	22471.4	15756.4	27173.6	4587.08	8991.19	23623.6	1433.68	19457.7	11036.9	7631.19	30638.1	39735.5	27446.7	19930.4	19633.7	53103.6	11305	3222.78	4251.38	9200.38	5415.39	14530.4	6918.82
496	H2122	Afat + 849 73	6	19110.6	7.39645	14838.8	657.208	417.799	17378.7	10509.1	23861	16350.3	27722.5	5281.68	7926.76	22697.3	1573.41	19187.2	10066.8	8192.71	34544.4	43477.6	28853.9	20333	20889.5	51534.2	10076.9	4150.57	3255.17	6087.54	5653.33	12657.4	3304.37
497	H2122	RMC	6	20994.2	28.2191	14545	787.608	482.992	18601.6	10456.7	34200.6	18958.4	33860.4	7840.05	22247.8	36680.5	2998.9	19890.5	21205.2	12076.3	37797.6	40538.2	28853.9	21057.2	20496.3	60475.9	13534.5	5647.68	2866.94	7785.36	5486.25	16932.7	5681.67
498	H2122	RMC	6	18233.2	80.3989	13306.4	758.999	395.44	15646.5	9274.28	30638.1	15244.9	30333.2	7215.59	15599.6	30946	3096.41	16597.4	17205.8	10700	36680.5	43914.5	27446.7	19535.7	19034.3	52575.2	10905.3	6051.13	3284.6	5825.5	5276.4	12823.1	8291.61
499	H2122	RMC + 849 0.1	6	18324.6	121.389	12016.1	635.238	500.696	14072.8	9209.59	26635.5	15244.9	31257.1	6348.66	14157.5	28282.5	2333.21	16564.2	11510.3	8416.93	34544.4	40538.2	23623.6	16983.5	16949.6	50011.1	9867.48	4332.93	2864.07	5297.55	5843	12222.1	6361.38
500	H2122	RMC + 849 0.1	6	21078.3	151.26	14200	861.78	477.231	18920.5	11181.3	32859.6	20455.3	38948.7	6581.38	23388.5	32532.7	2599.31	22026.5	16966.6	9018.2	35596.4	37049.1	27446.7	19168	21894.7	66171.2	13877.2	5813.86	4200.67	6185.73	6795.39	14486.9	5913.54
501	H2122	RMC + 849 0.3	6	21982.5	26.7892	13602.4	782.114	485.413	17448.3	10415	32532.7	20994.2	37421.5	10373.4	21205.2	30638.1	2708.09	20702.3	26108.1	17240.2	32532.7	34200.6	27173.6	16898.8	22697.3	59874.1	16881.9	7420.49	4380.86	10127.4	6607.76	15260.2	5608.28
502	H2122	RMC + 849 0.3	6	21807.3	83.7637	14314.1	810.783	469.186	18398	11048	32859.6	21504.1	37421.5	10342.3	22471.4	31257.1	3080.97	22697.3	26635.5	18215	35596.4	37049.1	29143.9	17034.6	24834.8	66836.2	18015.7	6707.62	5574.74	8848.47	7457.68	14285.5	6361.38
503	H2122	RMC+ 849 0.9	6	22471.4	104.585	15002.9	867.833	675.869	21633.5	11568	35596.4	27722.5	43044.9	12052.2	21611.9	26635.5	2261.99	21568.7	30333.2	19496.7	30638.1	30638.1	28001.1	15914.7	24100.8	62317.6	17361.3	6342.32	5100.02	10117.3	8006.43	17979.7	6911.9
504	H2122	RMC+ 849 0.9	6	21226.4	112.393	14545	1051.53	467.313	20475.8	10467.2	32859.6	25084.4	39735.5	9730.3	20910.4	25848.3	2201.73	21162.8	26635.5	15506.3	30333.2	30638.1	26903.2	15709.2	22925.4	61697.6	16333.9	5260.6	5074.58	9461.63	8760.43	14735.3	6136.44
505	H2122	RMC + 849 2.7	6	24587.7	60.8249	14016.6	889.803	494.724	18996.3	11896.5	28001.1	22697.3	43477.6	7707.89	21461.2	31257.1	1426.53	23861	26903.2	13960.7	33523.4	32859.6	28853.9	17274.7	23623.6	62944	21482.6	5491.74	6674.17	10636	7480.09	16881.9	8333.18
506	H2122	RMC + 849 2.7	6	23861	91.6521	13849.4	854.059	665.142	20353.3	12444.1	27173.6	24343	44801.6	9009.19	24100.8	28282.5	1571.84	24587.7	27722.5	16026.5	30946	29732.6	26635.5	15709.2	24100.8	62944	22471.4	6285.5	5796.44	10249.7	8030.48	17051.6	7517.58
507	H2122	RMC + 849 8.1	6	23861	166.667	12913.1	1010.3	479.143	17694.3	10332	21226.4	18233.2	40538.2	5491.74	15898.8	25336.5	942.937	19950.3	12544	7887.22	33189.9	32209	25084.4	15063	18471.8	54176.3	16983.5	4774.29	5819.67	8561.24	8242.02	15946.6	5943.18
508	H2122	RMC + 849 8.1	6	24100.8	162.552	13160.8	941.995	467.313	17500.8	10446.3	22471.4	20191.2	40538.2	7143.8	17943.8	27446.7	1207.13	22697.3	14794.3	9414.44	35242.2	35954.1	28566.8	16614	20292.4	61697.6	18920.5	5120.46	6822.63	8476.05	8143.7	16187.6	7079.79
509	H2122	RMC + 849 24	6	26635.5	27.3031	11192.5	947.664	609.72	14285.5	11544.9	19692.6	17292	42192.6	6884.31	14157.5	32209	1507.19	23623.6	19831	13849.4	40945.6	43477.6	32859.6	19264.1	21461.2	59874.1	23388.5	6981.37	7058.59	8866.19	4919.69	16949.6	5105.12
510	H2122	RMC + 849 24	6	25591.1	138.795	11248.6	945.771	544.572	16090.8	9442.72	19399.5	18807.3	43477.6	6229.18	17000.5	29143.9	1420.83	25084.4	21461.2	13226.8	36315.5	36680.5	31888.5	16831.4	22697.3	64215.5	25336.5	6185.73	7669.45	8127.43	5508.24	15214.4	1817.11
511	H2122	RMC + 849 73	6	23623.6	117.448	11766.4	876.556	406.263	15867.1	9566.29	19187.2	21162.8	47098.7	6877.43	15123.4	25848.3	1381.6	24834.8	20434.9	12004.1	33189.9	32209	28853.9	14958	22247.8	64860.9	23623.6	5541.39	6087.54	7982.44	6185.73	14200	2344.91
512	H2122	RMC + 849 73	6	26370.5	131.105	10829.2	927.043	503.206	15740.6	9614.23	20475.8	21354.1	45251.9	8242.02	15168.9	26903.2	1361.03	24834.8	19751.8	14115.1	36315.5	36315.5	30031.4	15260.2	20931.3	61697.6	22925.4	6795.39	8030.48	7800.94	7646.48	15153.7	4726.78
513	H2122	Vistusertib	6	18142.3	84.6056	14868.5	528.477	503.206	16139.1	12964.9	40134.9	19594.4	28853.9	3960	326.686	579.404	33860.4	17413.5	632.702	18508.8	3071.74	8569.8	4011.82	16333.9	23388.5	68871.7	13413.3	15787.9	5837.16	7465.15	4651.75	11789.9	5039.18
514	H2122	Vistusertib	6	18508.8	86.3147	14574.1	265.602	538.614	13988.6	12990.8	36680.5	16781	28001.1	3975.87	185.49	266.667	28853.9	16663.9	404.641	13003.8	1954.72	7847.89	3554.61	16597.4	21807.3	64215.5	13413.3	14720.6	7958.54	6981.37	5239.6	10188.3	3740.6
515	H2122	Vistusertib + 849 100nM	6	18601.6	115.353	15138.6	195.586	540.233	14342.8	13467	24343	14101	22925.4	2349.6	139.91	327.668	2678.47	15306	176.62	10404.6	2681.15	4142.28	3337.58	16481.6	18087.9	49513.5	8510.02	6087.54	5151.28	6863.68	5733.03	11766.4	1777.57
516	H2122	Vistusertib + 849 100nM	6	19910.5	133.22	15772.1	195.39	490.292	15867.1	13766.6	25848.3	15898.8	25084.4	2609.72	105.425	107.125	2675.79	17765.3	64.5216	8151.85	2145.23	4247.14	3494.69	16448.7	19653.3	57526.4	8751.67	5437.09	5271.13	6317	5978.95	11602.8	3744.34
517	H2122	Everolimus	6	19930.4	86.4875	14676.5	480.583	468.717	16949.6	12682.8	39735.5	19751.8	35242.2	4455.97	288.877	573.065	12222.1	20010.3	12964.9	7398.26	17694.3	43914.5	15693.5	18751	23623.6	83283	17570.9	14002.6	6568.23	4703.21	5508.24	13306.4	7016.36
518	H2122	Everolimus	6	20475.8	86.8342	14705.8	277.272	474.851	17051.6	11837.2	40538.2	20373.7	33860.4	3763.11	217.457	336.299	14632.5	21916.6	13548.1	9054.35	16949.6	44801.6	17102.8	20394.1	25848.3	88433	17961.7	15002.9	6870.55	4019.85	6026.97	12076.3	4949.29
519	H2122	Everolimus + 849 100nM	6	20455.3	94.2546	14228.5	146.35	502.201	15740.6	12161.1	24343	15475.3	32532.7	2681.15	151.714	346.541	1747.6	20455.3	7115.28	4689.12	14129.2	47572	16514.6	19225.6	19399.5	61083.7	10807.5	5653.33	4500.75	4158.88	5698.74	12848.7	2006.2
520	H2122	Everolimus + 849 100nM	6	21461.2	120.061	14472.4	197.947	434.415	17171.4	12746.3	25336.5	18142.3	34200.6	2409.08	132.423	201.946	1725.03	23155.8	8192.71	5491.74	14044.7	43477.6	17765.3	19380.1	21375.5	63576.6	11395.8	5244.84	4779.06	4311.32	6247.89	14129.2	5813.86
521	H2122	Vehicle	24	20619.7	78.8857	13346.4	809.163	556.129	17553.3	11487.3	30946	22697.3	38561.1	6014.93	25336.5	32209	3751.83	23155.8	9681.77	2721.67	37049.1	34544.4	26635.5	18564.4	29143.9	87553	15428.9	12594.3	6995.34	4264.16	6191.92	13561.6	4717.34
522	H2122	Vehicle	24	22247.8	113.75	13711.6	715.513	688.834	17925.9	11452.9	30946	20251.8	35954.1	6045.08	23623.6	32532.7	3501.69	23388.5	8751.67	2090.17	38177.4	38948.7	29143.9	19673	27173.6	87553	14086.9	13960.7	7129.52	3666.53	6304.38	12746.3	4523.31
523	H2122	849 0.1nM	24	25336.5	101.19	9837.93	880.069	547.301	12926.1	10509.1	26108.1	20826.9	39735.5	6542.01	23155.8	32859.6	3071.74	24587.7	8830.8	2455.29	36680.5	35596.4	30946	19950.3	26635.5	90219.4	19990.2	12926.1	13426.7	4637.82	4745.73	13440.1	7608.34
524	H2122	849 0.1nM	24	25591.1	153.546	8875.05	890.693	623.906	11920.3	10488.1	21698.5	14559.5	37049.1	5308.16	17292	32532.7	2801.75	21205.2	5074.58	1690.87	43914.5	47098.7	31257.1	22026.5	22247.8	82454.3	15724.9	13386.5	13932.8	4359.01	5519.27	13226.8	7058.59
525	H2122	849 0.3nM	24	24834.8	136.183	8062.67	840.503	610.941	10593.5	10006.6	18939.4	14458	35242.2	4895.15	14883.4	31571.2	2771.1	21418.3	5738.77	1655.73	43044.9	47098.7	31571.2	20952.2	21015.2	80017.4	15123.4	11159	14101	4076.52	5819.67	13386.5	13821.8
526	H2122	849 0.3nM	24	27722.5	111.163	9237.25	950.511	478.665	11884.6	10087	23861	18958.4	39340.1	5727.3	20110.6	37421.5	3026.01	26903.2	6535.47	2052.88	46166	47572	36680.5	22471.4	28853.9	96761	18844.9	12823.1	12234.3	3774.41	7982.44	12344.9	1288.2
527	H2122	849 0.9nM	24	26108.1	175.037	11801.7	959.105	583.474	17430.9	12797.4	27722.5	21439.7	40134.9	5197.85	19930.4	30031.4	2117.52	24834.8	8910.63	2810.17	34891.6	34200.6	30638.1	21568.7	29732.6	85819.3	16448.7	8848.47	12784.6	4376.48	2121.76	10198.5	716.945
528	H2122	849 0.9nM	24	25084.4	114.778	11214.9	837.147	609.111	15521.8	12161.1	24587.7	17623.7	40134.9	4394.02	17465.8	29436.8	1958.63	23623.6	5895.83	1723.31	37421.5	40134.9	30031.4	21720.2	23155.8	81633.9	14271.2	9740.04	10056.8	3800.93	1420.83	8168.17	995.256
529	H2122	849 2.7nM	24	25591.1	153.7	11754.6	1108.76	553.909	17068.7	12913.1	24343	22925.4	44801.6	4023.87	15352	25336.5	1799.02	27446.7	7420.49	1763.4	31257.1	32859.6	29143.9	20826.9	24834.8	78433	14486.9	7654.12	10625.4	4788.63	1751.1	10280.5	4.53999e-05
530	H2122	849 2.7nM	24	26370.5	132.29	11136.7	837.985	565.664	15078.1	11226.1	22925.4	18288	37049.1	4496.26	10786	24587.7	1600.39	24343	5866.42	1576.56	36680.5	42192.6	30638.1	20516.8	22026.5	73865.4	12307.9	8291.61	8595.55	4096.96	2252.96	8299.91	4.53999e-05
531	H2122	849 8.1nM	24	25591.1	179.828	14559.5	1274.11	625.155	20496.3	13974.6	27446.7	26635.5	47098.7	4532.37	11170.1	21120.5	1480.3	29436.8	11147.8	2638.59	28853.9	31888.5	27173.6	20578.5	26108.1	71682.4	11849	8433.78	7517.58	4332.93	3812.35	13904.9	2182.01
532	H2122	849 8.1nM	24	25848.3	129.153	12307.9	931.69	541.314	17274.7	12797.4	22697.3	17997.7	38177.4	3586.75	6802.19	17729.8	1420.83	26370.5	6687.53	2034.49	33189.9	42192.6	29436.8	20373.7	20312.7	63576.6	10219	7302.7	5907.63	2810.17	2939.52	11103.3	2389.88
533	H2122	849 24nM	24	24100.8	104.69	12720.9	974.574	653.93	16301.3	12149	22697.3	19516.2	38561.1	3640.95	4204.88	12544	1399.68	28282.5	7895.12	2048.78	29143.9	39340.1	27446.7	20619.7	20090.5	55270.8	7044.48	5761.77	8408.51	3505.19	3473.78	11464.4	2892.86
534	H2122	849 24nM	24	22925.4	105.636	11884.6	849.799	557.8	14764.8	11316.3	20050.3	15290.7	31257.1	3456.46	2957.21	11059	1490.7	24587.7	5653.33	1706.16	30946	46630	25591.1	20050.3	17729.8	47098.7	5878.16	7230.04	8341.52	3435.78	4048.09	12283.4	2975
535	H2122	849 73nM	24	23155.8	102.105	12619.5	887.138	612.164	15552.9	13333	19692.6	18939.4	35242.2	3744.34	2578.6	10097.1	1350.19	25591.1	7215.59	2273.33	30638.1	41772.8	25848.3	19380.1	19283.4	46630	6515.89	5286.97	5569.16	4056.19	5140.99	13918.9	4614.69
536	H2122	849 73nM	24	23861	145.474	13670.6	886.251	550.595	16814.5	12531.5	20806.1	19110.6	35596.4	3774.41	3111.94	11059	1437.99	28001.1	8022.46	2815.79	31571.2	44355.8	26903.2	19633.7	20496.3	48533	7058.59	6802.19	7143.8	3340.92	5079.66	12720.9	3543.96
537	H2122	Afatinib	24	20191.2	26.1801	14143.4	633.969	292.657	15630.8	9452.18	26635.5	16058.6	34891.6	4125.74	12444.1	28001.1	2542.75	20110.6	6483.4	1553.09	40134.9	48533	33189.9	20785.3	20030.3	64215.5	9887.24	7887.22	3108.82	3835.29	6361.38	13534.5	5404.57
538	H2122	Afatinib	24	19890.5	52.0393	14764.8	738.042	432.681	17747.5	9720.58	28001.1	16383	38561.1	3586.75	13042.9	28282.5	3222.78	22004.4	6179.55	1382.99	39735.5	48533	34891.6	21482.6	20599	70262.9	10467.2	7361.36	2705.39	3703.38	6438.18	12951.9	3932.38
539	H2122	Afat + 849 0.1	24	19910.5	61.4977	15123.4	555.573	544.572	16514.6	12332.6	32532.7	19380.1	35242.2	6451.06	13226.8	25336.5	4238.65	20619.7	11614.4	3554.61	38177.4	42192.6	29436.8	19457.7	25084.4	70969.1	13629.6	10764.4	7310.01	5324.11	4793.42	12556.6	3659.2
540	H2122	Afat + 849 0.1	24	21057.2	110.388	14588.7	669.145	499.696	16415.8	11418.6	32859.6	19516.2	37797.6	6412.47	13711.6	26108.1	4731.51	22697.3	13095.2	4221.73	40134.9	44801.6	33189.9	20455.3	25591.1	78433	13960.7	11395.8	6995.34	4101.06	4523.31	11956.1	3408.41
541	H2122	Afat + 849 0.3	24	20373.7	64.3927	14385.8	588.749	500.696	16220	11684.3	29732.6	19168	36680.5	4550.54	12076.3	24834.8	2945.4	21807.3	10446.3	2335.54	40134.9	44801.6	32859.6	19653.3	23155.8	76114.9	12569.1	9265.01	5642.03	4200.67	4482.79	12657.4	4238.65
542	H2122	Afat + 849 0.3	24	21226.4	63.752	15444.4	800.311	565.098	19831	12771.9	34200.6	25848.3	42616.6	5009.04	17854.3	26635.5	3111.94	27173.6	13121.4	2858.35	35596.4	37049.1	32209	19673	25848.3	88433	16010.5	10753.6	7093.96	4196.47	5453.43	12271.1	2056.99
543	H2122	Afat + 849 0.9	24	22697.3	62.2401	17943.8	789.974	600.642	13616	13467	35954.1	28282.5	51534.2	5393.77	15851.2	24343	2467.6	26635.5	13974.6	3310.98	34891.6	33860.4	30946	17535.8	25848.3	82454.3	15978.5	7079.79	5255.34	5519.27	6502.88	13932.8	5773.31
544	H2122	Afat + 849 0.9	24	21850.9	88.677	16630.6	837.985	511.322	22697.3	12506.5	34200.6	26108.1	47572	4969.13	15490.8	24587.7	2326.22	28566.8	13794.1	3206.71	33860.4	33523.4	31257.1	18713.5	26635.5	85819.3	16187.6	8973.22	5356.15	4740.98	6323.32	13725.4	5115.34
545	H2122	Afat + 849 2.7	24	19791.3	45.4676	16680.6	734.36	585.813	20333	12052.2	28282.5	20702.3	41357.1	3633.68	6891.2	16317.6	1495.18	25336.5	8699.32	1954.72	32532.7	34544.4	25591.1	17553.3	21850.9	66836.2	10270.2	5901.72	4350.3	5825.5	5866.42	12369.6	5967
546	H2122	Afat + 849 2.7	24	22247.8	59.7399	19244.9	627.661	449.439	15275.4	9209.59	17783	18453.3	44355.8	4213.29	5597.08	15630.8	1619.71	23861	7600.73	1645.83	33523.4	40945.6	27722.5	17765.3	21611.9	64215.5	9423.86	6099.73	5130.71	4890.26	5931.31	12222.1	4591.67
547	H2122	Afat + 849 8.1	24	19850.8	75.1886	16301.3	790.764	474.376	21655.2	12040.1	26108.1	19360.7	40134.9	2969.06	3858.37	11837.2	1298.55	29143.9	9027.22	2168.95	31571.2	37797.6	28566.8	18901.6	19535.7	55270.8	8742.93	5297.55	3916.68	5767.53	6431.74	14016.6	6904.99
548	H2122	Afat + 849 8.1	24	20070.4	51.8835	15584	801.111	414.884	18977.3	11237.4	24587.7	17518.3	36315.5	2570.87	2779.43	10786	1336.75	26635.5	8160	2002.2	33189.9	43914.5	29732.6	18106	18379.7	48533	7339.31	3948.14	3877.71	5064.44	6260.4	14200	5044.23
549	H2122	Afat + 849 24	24	19910.5	24.1915	15867.1	748.447	553.355	19206.4	12173.3	22925.4	17017.5	33523.4	2846.94	2077.66	7840.05	1141.39	26108.1	7016.36	1935.27	29143.9	42616.6	27446.7	18638.8	16697.3	40538.2	5151.28	4247.14	3310.98	5203.05	6614.37	12581.7	5608.28
550	H2122	Afat + 849 24	24	18694.8	56.7695	15063	813.219	483.475	17396.1	10425.4	20496.3	13656.9	33523.4	2380.34	2090.17	7510.07	1133.43	25848.3	4661.07	1095.54	27722.5	46166	25591.1	19129.8	15336.6	35242.2	4251.38	3846.81	3449.55	4188.09	6393.26	11778.1	5140.99
551	H2122	Afat + 849 73	24	18769.7	73.479	15882.9	974.574	459.896	21311.5	11373	23861	21078.3	38177.4	3242.17	2100.65	6843.13	1352.89	29436.8	9145.35	2945.4	25848.3	35596.4	25591.1	19187.2	19850.8	38561.1	5756.01	3601.12	3432.35	7435.34	7143.8	14486.9	3442.66
552	H2122	Afat + 849 73	24	19614	75.7168	15724.9	869.571	457.145	20394.1	11293.7	21763.7	16747.4	37421.5	2445.49	1761.64	6105.83	1011.31	28282.5	5693.04	1725.03	26108.1	39735.5	25591.1	19692.6	17205.8	35242.2	4949.29	3944.19	2465.13	5733.03	6884.31	13629.6	3718.22
553	H2122	RMC	24	21205.2	133.887	14588.7	982.401	481.064	20660.9	11316.3	28001.1	19732.1	43914.5	3699.67	11980.1	23155.8	1148.26	24100.8	10107.2	2846.94	33523.4	35954.1	22925.4	18306.3	18844.9	57526.4	9946.74	4121.62	3748.08	6111.95	6222.95	14750	4518.79
554	H2122	RMC	24	19168	137.552	14868.5	911.417	495.714	21036.2	10807.5	27722.5	18215	38177.4	5329.43	10786	23155.8	3314.29	26903.2	9847.76	2633.32	30333.2	37421.5	21141.6	17292	22471.4	49513.5	9127.07	7769.8	4856.14	6775.04	6335.98	14371.5	5229.13
555	H2122	RMC + 849 0.1	24	20010.3	139.91	14515.9	953.367	622.66	17800.8	10467.2	27446.7	17694.3	41357.1	4167.2	7863.6	20475.8	1303.75	22697.3	9710.86	2581.17	35242.2	41357.1	24100.8	19225.6	18142.3	51534.2	8408.51	4670.4	4788.63	6087.54	7707.89	15336.6	5329.43
556	H2122	RMC + 849 0.1	24	19811.1	95.4879	15229.7	992.275	478.665	19950.3	10593.5	26370.5	17800.8	42616.6	3080.97	8690.62	20050.3	1380.22	22925.4	7405.66	2275.6	31257.1	37797.6	23155.8	17943.8	18033.7	51021.4	7398.26	3637.31	3831.46	5475.29	7122.4	14256.9	3586.75
557	H2122	RMC + 849 0.3	24	20764.5	88.4998	14545	954.321	483.959	21375.5	11707.7	28853.9	24100.8	48533	4138.13	8022.46	16730.7	1299.84	24587.7	16383	3442.66	26903.2	29732.6	26108.1	15244.9	18601.6	54720.8	12246.6	4890.26	6026.97	9681.77	8391.71	15693.5	5919.46
558	H2122	RMC + 849 0.3	24	20931.3	88.9434	14214.3	956.231	496.707	21872.8	11591.2	27446.7	23388.5	50011.1	3862.23	8875.05	17292	1190.35	26903.2	14200	2694.59	29143.9	31257.1	28282.5	15994.5	20070.4	56954	12469	5350.79	4969.13	7631.19	8595.55	14676.5	6607.76
559	H2122	RMC+ 849 0.9	24	21676.9	126.09	14342.8	943.881	557.8	22471.4	11766.4	28001.1	24834.8	52575.2	4175.54	5813.86	14299.8	1292.07	26370.5	14129.2	3090.23	27173.6	29732.6	26635.5	16220	19930.4	51534.2	11070.1	5670.31	6399.66	7934.69	9720.58	16139.1	4736.25
560	H2122	RMC+ 849 0.9	24	20292.4	126.469	14200	1116.55	473.902	22471.4	11305	26370.5	23388.5	51021.4	3850.66	5773.31	13697.9	1283.06	26903.2	13016.9	2601.91	26108.1	30031.4	26370.5	15787.9	18732.2	51534.2	10456.7	5399.17	5513.75	7390.86	9265.01	14794.3	6386.87
561	H2122	RMC + 849 2.7	24	25084.4	87.008	12606.9	1028.65	513.372	17483.3	11003.8	21375.5	20455.3	53103.6	3699.67	3611.94	9798.65	1038.99	26370.5	11568	3258.43	26903.2	35596.4	26903.2	16155.2	15537.3	41357.1	10657.3	6707.62	7879.35	6721.05	8866.19	16714	6781.81
562	H2122	RMC + 849 2.7	24	22925.4	135.368	13766.6	1167.94	527.422	21655.2	11908.4	25848.3	23861	58104.6	4142.28	4944.34	12357.3	1099.93	30638.1	18251.5	4376.48	26108.1	30031.4	27173.6	15994.5	19129.8	50513.7	13147.7	5670.31	6235.41	7715.61	9018.2	15724.9	5990.92
563	H2122	RMC + 849 8.1	24	26370.5	203.772	15048	1235.21	615.848	22925.4	13521	28566.8	29143.9	58688.5	5727.3	2942.46	9808.45	1519.29	27722.5	16564.2	5710.14	25591.1	31257.1	24343	14574.1	16915.7	42192.6	10383.8	6020.95	6568.23	9136.2	9108.83	15615.2	8225.55
564	H2122	RMC + 849 8.1	24	22697.3	115.008	12344.9	974.574	439.22	15898.8	11271.1	21676.9	18087.9	40945.6	4023.87	2113.29	8358.21	1061.03	25591.1	12619.5	3381.25	26903.2	38948.7	24587.7	17765.3	14559.5	34200.6	7769.8	5049.28	7990.43	6946.55	9433.29	15867.1	4332.93
565	H2122	RMC + 849 24	24	26635.5	208.513	11441.5	1103.23	518.013	17818.6	11825.3	22471.4	27173.6	59874.1	5486.25	3579.58	10415	1330.09	31571.2	24100.8	8813.14	26903.2	31571.2	29143.9	15352	19751.8	47572	14530.4	6747.99	8038.51	8200.91	7186.79	14314.1	628.289
566	H2122	RMC + 849 24	24	25848.3	184.012	10208.7	1085.72	510.301	16203.8	10593.5	19187.2	19751.8	52575.2	4230.18	2411.49	7998.43	1250.13	30638.1	13082.1	4247.14	27173.6	37049.1	28566.8	14603.3	16074.7	38561.1	13656.9	5955.08	11849	7547.71	6843.13	13426.7	3901.05
567	H2122	RMC + 849 73	24	23623.6	164.35	10872.6	1072.77	436.592	17783	10938	19438.3	25084.4	58104.6	4294.11	2635.95	9788.86	1248.88	35954.1	18732.2	6198.11	29732.6	35596.4	30638.1	15994.5	18732.2	47098.7	14371.5	7990.43	7427.91	6700.92	6870.55	14385.8	4411.63
568	H2122	RMC + 849 73	24	23388.5	196.566	11849	1242.65	423.689	17925.9	10467.2	18694.8	22471.4	53103.6	3889.36	2878.43	10076.9	1307.67	34544.4	14299.8	3877.71	28566.8	34891.6	27446.7	15260.2	16949.6	41772.8	13670.6	7623.57	7317.32	7600.73	7847.89	15352	1939.14
569	H2122	Vistusertib	24	19771.6	107.662	15978.5	529.535	499.197	15803.7	11968.1	33189.9	16747.4	30333.2	3866.09	188.859	449.889	11395.8	17000.5	589.928	9986.6	3071.74	9769.3	2821.43	17483.3	18178.6	54720.8	10415	14898.3	4460.43	7186.79	6788.6	12382	8176.34
570	H2122	Vistusertib	24	19341.3	97.028	16898.8	144.315	569.068	15756.4	13821.8	33860.4	16123	28566.8	3893.25	107.34	241.049	11430	17223	567.931	9847.76	2465.13	8242.02	2542.75	16155.2	17361.3	54176.3	9966.65	14574.1	4158.88	7942.63	6747.99	11103.3	4213.29
571	H2122	Vistusertib + 849 100nM	24	21396.9	133.486	16366.6	208.513	508.263	16797.7	13306.4	22925.4	15168.9	26635.5	2177.65	84.4365	247.151	1898.84	19034.3	92.3883	9936.8	2014.25	3831.46	2002.2	17205.8	14242.7	37049.1	4919.69	5324.11	4255.64	6130.3	7044.48	12406.8	3084.05
572	H2122	Vistusertib + 849 100nM	24	20231.6	162.065	16564.2	191.33	550.595	15709.2	13766.6	22471.4	13108.3	25084.4	2119.64	90.1072	207.265	1992.21	17500.8	64.4571	10668	1564	3670.2	1779.34	16432.2	13849.4	32859.6	4354.65	5524.79	3168.46	7002.34	6640.88	12320.3	6057.18
573	H2122	Everolimus	24	21120.5	93.6908	15803.7	532.19	465.914	18545.8	11556.5	38948.7	23623.6	43044.9	3710.79	261.386	396.232	8716.73	24343	4822.27	8070.74	17034.6	43914.5	16614	21354.1	21807.3	67507.9	13588.8	12581.7	5420.8	4904.95	7259.02	15693.5	6361.38
574	H2122	Everolimus	24	21078.3	84.8598	16203.8	272.326	451.692	19457.7	11226.1	35242.2	22471.4	43914.5	3354.31	171.229	321.823	6727.78	26108.1	3699.67	4984.06	17188.6	43477.6	16220	20702.3	21872.8	70262.9	12581.7	10046.7	4812.64	4319.96	7738.79	13548.1	4851.29
575	H2122	Everolimus + 849 100nM	24	19890.5	94.9167	15321.3	233.224	421.998	17413.5	11533.4	22247.8	18416.5	36315.5	2008.21	105.32	206.232	1637.62	26903.2	1210.76	4367.74	8078.81	42616.6	10383.8	19496.7	13561.6	30638.1	3453.01	4500.75	3827.63	4092.86	7435.34	13974.6	4651.75
576	H2122	Everolimus + 849 100nM	24	20516.8	98.396	16090.8	157.591	502.201	17326.6	11316.3	22247.8	17326.6	35954.1	2061.11	39.8451	240.808	1775.79	26370.5	1109.87	4707.91	8586.96	46166	10157.8	20414.5	13616	31257.1	2552.94	3804.73	3842.97	3850.66	7361.36	13891	6355.02
577	H2122	Vehicle	72	23861	119.701	13863.3	233.691	524.791	17623.7	11707.7	29143.9	21120.5	37421.5	7442.78	9759.53	20826.9	6640.88	25336.5	9339.43	4230.18	35242.2	39735.5	31571.2	19496.7	28001.1	81633.9	12124.7	13616	8586.96	3258.43	8111.19	13835.6	317.984
578	H2122	Vehicle	72	24343	149.157	13946.7	178.752	473.428	18142.3	12100.5	28853.9	21311.5	35954.1	6002.91	10894.3	21850.9	4740.98	26635.5	8366.57	2380.34	34891.6	39735.5	32532.7	20130.7	30031.4	81633.9	11649.3	13346.4	9623.85	3235.7	7532.63	13863.3	4359.01
579	H2122	849 0.1nM	72	28001.1	118.866	10280.5	438.781	510.811	14414.6	11159	25848.3	21547.2	42616.6	8046.56	11259.9	23388.5	5271.13	29436.8	9302.14	2832.74	37049.1	41357.1	39735.5	20373.7	28566.8	89321.7	18069.8	15321.3	16747.4	2980.96	8467.58	13213.6	7510.07
580	H2122	849 0.1nM	72	26903.2	187.354	9623.85	351.426	665.142	13346.4	10764.4	24100.8	18324.6	37797.6	6640.88	9246.5	22026.5	4969.13	29436.8	9228.02	3219.56	38948.7	44355.8	40134.9	22026.5	29436.8	91126.1	18215	17676.6	18601.6	3022.98	8184.52	12016.1	6535.47
581	H2122	849 0.3nM	72	28566.8	72.9665	9566.29	142.451	506.741	13904.9	10488.1	23155.8	18416.5	43477.6	6647.53	9976.63	22471.4	4438.18	28853.9	7129.52	2638.59	37421.5	42192.6	36315.5	19091.5	25084.4	81633.9	16350.3	14101	14429.1	3334.24	7623.57	15428.9	4478.3
582	H2122	849 0.3nM	72	29436.8	163.367	9255.75	165.009	491.273	14058.7	11181.3	23155.8	18751	40945.6	6581.38	9302.14	21568.7	4268.43	27722.5	6431.74	2604.51	37049.1	43044.9	37797.6	18826.1	23623.6	74607.8	13932.8	14824	17890	2951.3	8544.14	15033	9209.59
583	H2122	849 0.9nM	72	25848.3	165.836	11789.9	613.39	554.463	15803.7	12222.1	26635.5	21938.5	41772.8	6768.26	10332	22471.4	2954.25	27722.5	7623.57	1919.85	38561.1	40538.2	27722.5	20806.1	28001.1	78433	13849.4	12544	11384.4	3677.54	4359.01	11192.5	1006.26
584	H2122	849 0.9nM	72	26370.5	123.717	10710.7	252.144	538.076	13082.1	11544.9	22697.3	15882.9	34891.6	5519.27	6620.99	19322	3357.66	22925.4	6483.4	1766.93	39340.1	49020.8	28566.8	20272.1	23388.5	67507.9	10959.9	10872.6	13575.2	3991.81	3480.74	11660.9	4420.46
585	H2122	849 2.7nM	72	28566.8	215.94	11766.4	238.174	564.534	15459.8	12913.1	25591.1	20994.2	42192.6	6714.34	7193.98	19831	2948.35	27446.7	7009.35	2452.84	35596.4	43044.9	24834.8	19399.5	24834.8	68186.4	10970.9	10668	13160.8	3271.49	4146.42	11271.1	1415.16
586	H2122	849 2.7nM	72	27446.7	157.906	13121.4	245.918	578.825	16580.8	13413.3	27173.6	22026.5	43044.9	5895.83	8266.78	20496.3	3121.28	29436.8	8425.34	2246.21	32532.7	38561.1	24834.8	18453.3	25848.3	72402.8	11672.6	9857.62	12848.7	3320.93	5182.28	11361.7	159.812
587	H2122	849 8.1nM	72	25591.1	141.458	12926.1	625.781	499.197	16498.1	13213.6	28001.1	23388.5	43914.5	7354	6051.13	18069.8	3681.22	30333.2	12670.1	5767.53	29143.9	42616.6	21568.7	20394.1	22697.3	56954	8839.63	9907.03	9897.13	3203.5	4999.04	12064.2	2662.44
588	H2122	849 8.1nM	72	25591.1	193.64	14472.4	323.112	582.308	18901.6	13147.7	29732.6	26370.5	48533	5984.93	7442.78	19015.3	3274.76	34200.6	13932.8	5286.97	25848.3	36315.5	19341.3	19457.7	24587.7	64215.5	9000.18	9490.06	10270.2	3108.82	6574.81	12481.5	4949.29
589	H2122	849 24nM	72	24100.8	203.772	14171.7	321.823	581.145	17800.8	13974.6	28282.5	24587.7	46166	6210.52	4726.78	14044.7	3087.14	33523.4	15756.4	4684.43	19457.7	34544.4	17961.7	17606.1	20847.7	51534.2	7368.72	11014.9	8848.47	4183.9	6026.97	12784.6	5761.77
590	H2122	849 24nM	72	25336.5	158.698	13780.4	228.378	626.407	19496.7	14200	29436.8	23861	43914.5	5519.27	4969.13	15260.2	3099.51	33189.9	15184	3940.25	18087.9	34544.4	17257.5	18178.6	22026.5	50513.7	7251.76	8786.75	10127.4	3422.07	6607.76	12990.8	4836.76
591	H2122	849 73nM	72	21461.2	199.737	15184	676.546	622.037	20010.3	14371.5	30031.4	26635.5	45251.9	6946.55	4285.53	11992.1	3377.87	33860.4	22471.4	10383.8	16074.7	30031.4	14256.9	18142.3	21354.1	45706.7	6877.43	9452.18	7707.89	4591.67	9339.43	13003.8	5458.88
592	H2122	849 73nM	72	21247.6	187.729	14285.5	353.188	575.938	18361.3	14228.5	27446.7	23623.6	43477.6	5239.6	4363.37	11521.8	3388.02	34200.6	19614	7910.92	12283.4	31888.5	14779.6	18788.5	19341.3	44355.8	5733.03	9191.19	9808.45	4568.77	9867.48	13616	4764.75
593	H2122	Vistusertib	72	25084.4	138.518	18361.3	744.714	502.703	16814.5	11637.6	36680.5	17483.3	31257.1	5491.74	141.458	346.887	29436.8	15756.4	1382.99	37049.1	2573.44	10394.2	2727.12	17154.2	16983.5	51021.4	11214.9	16714	5943.18	8078.81	7692.49	15584	9701.16
594	H2122	Vistusertib	72	21268.9	159.812	16090.8	313.563	546.755	17017.5	11884.6	35242.2	15336.6	28853.9	4230.18	92.6658	196.96	25848.3	15048	960.064	30333.2	1784.69	7723.32	2079.74	15428.9	15819.5	46166	9099.73	15413.5	4545.99	7958.54	7707.89	13226.8	7215.59
595	H2122	Vistusertib + 849 100nM	72	21742	246.411	13453.6	240.567	448.541	12444.1	9218.8	21290.1	12246.6	24100.8	2096.45	143.022	152.018	3529.81	18142.3	376.908	32859.6	1355.6	3543.96	1489.21	15168.9	11305	23388.5	3190.71	6087.54	4221.73	6142.58	8612.76	14414.6	7762.03
596	H2122	Vistusertib + 849 100nM	72	22925.4	300.365	13413.3	252.144	521.13	14115.1	9423.86	20847.7	13333	26635.5	2160.29	129.541	181.272	3398.19	20394.1	470.126	30031.4	1456.8	4411.63	1412.34	15819.5	12209.9	25848.3	3540.42	6367.74	5415.39	5773.31	9090.63	13656.9	11778.1
597	H2122	Everolimus	72	25084.4	116.863	15459.8	604.862	473.428	22026.5	10970.9	44355.8	28566.8	50513.7	5658.98	179.11	256.724	21332.8	25084.4	24834.8	32859.6	18160.4	32532.7	14574.1	15898.8	21763.7	73865.4	23388.5	14913.2	7376.1	6918.82	10157.8	15693.5	6995.34
598	H2122	Everolimus	72	23155.8	124.961	15382.7	427.092	477.231	22925.4	11684.3	42616.6	27722.5	51021.4	5340.1	171.743	300.967	15756.4	25848.3	22004.4	22925.4	19015.3	32209	14314.1	15552.9	21633.5	75357.6	21916.6	14101	7273.55	7193.98	10373.4	15078.1	6741.25
599	H2122	Everolimus + 849 100nM	72	22004.4	195.39	15772.1	372.784	545.662	19034.3	12234.3	31257.1	24834.8	48050.1	2796.15	145.329	245.182	4523.31	29436.8	6310.69	45706.7	6361.38	29732.6	5721.58	14705.8	12874.5	32532.7	6386.87	6727.78	6431.74	7840.05	12431.6	15787.9	9000.18
600	H2122	Everolimus + 849 100nM	72	23623.6	239.847	14115.1	348.975	500.696	19187.2	12149	30031.4	23861	47098.7	3004.9	139.352	199.138	3956.04	28566.8	4934.47	30946	5978.95	30946	5647.68	15017.9	11591.2	30638.1	5733.03	5773.31	6247.89	6167.2	12746.3	16564.2	12861.6
601	MIA PaCa-2	Vehicle	6	21396.9	151.714	12644.8	284.291	539.693	15413.5	12531.5	21268.9	32532.7	27173.6	19496.7	36315.5	41357.1	6822.63	38177.4	242.742	85.7984	23861	38948.7	18676.1	14913.2	38561.1	46630	5177.1	20312.7	12531.5	2303.07	9798.65	14314.1	4113.38
602	MIA PaCa-2	Vehicle	6	21461.2	242.985	13346.4	215.94	630.177	18342.9	14285.5	24100.8	40134.9	29732.6	25591.1	51534.2	40945.6	7982.44	40945.6	487.846	185.119	21568.7	32209	17430.9	14400.2	40134.9	54176.3	6008.92	21482.6	12835.9	2532.6	10796.7	14853.6	5469.82
603	MIA PaCa-2	849 0.1nM	6	24587.7	174.863	8299.91	125.086	504.214	11048	11147.8	16614	31257.1	26108.1	25591.1	35242.2	43477.6	9191.19	37797.6	311.376	243.228	25084.4	39340.1	17943.8	14157.5	31257.1	39340.1	8160	23155.8	20010.3	2855.49	8119.31	12088.4	7143.8
604	MIA PaCa-2	849 0.1nM	6	24100.8	269.347	7600.73	191.905	609.111	11339	11614.4	16220	31571.2	27446.7	22925.4	32859.6	40538.2	9108.83	37421.5	363.58	481.064	23623.6	38561.1	16797.7	13279.8	31888.5	38177.4	9108.83	21247.6	19555.3	3357.66	7361.36	12246.6	6843.13
605	MIA PaCa-2	849 0.3nM	6	25084.4	203.568	8217.32	214.005	684.029	12394.4	11766.4	17483.3	40538.2	29732.6	22925.4	39340.1	40945.6	9828.09	39735.5	400.214	859.199	21938.5	31888.5	18620.2	11813.5	34891.6	42192.6	10188.3	22697.3	18694.8	3310.98	7065.65	13293.1	7317.32
606	MIA PaCa-2	849 0.3nM	6	26635.5	209.977	9414.44	212.938	646.776	12088.4	12088.4	18453.3	40945.6	30638.1	23388.5	40538.2	40538.2	8586.96	39735.5	409.526	277.55	22471.4	31888.5	17309.3	12246.6	34200.6	41357.1	7700.19	20030.3	18826.1	2980.96	6822.63	13253.3	9916.94
607	MIA PaCa-2	849 0.9nM	6	23623.6	142.736	9808.45	90.5589	444.078	12506.5	12088.4	18288	31888.5	25336.5	18233.2	35242.2	42192.6	5281.68	37049.1	210.819	4.53999e-05	26108.1	41772.8	18863.8	16383	34544.4	38948.7	5744.51	15444.4	15835.4	2287.01	8612.76	12124.7	1861.24
608	MIA PaCa-2	849 0.9nM	6	23861	117.214	9916.94	145.184	551.146	13240	11932.2	17518.3	32859.6	28001.1	19225.6	37797.6	43477.6	5681.67	39340.1	241.773	227.693	24343	38948.7	20130.7	14661.8	34544.4	40945.6	5831.33	16898.8	14676.5	2470.07	8535.59	11956.1	2913.18
609	MIA PaCa-2	849 2.7nM	6	24834.8	184.38	9575.85	249.635	681.298	12271.1	12581.7	17765.3	34200.6	27173.6	19034.3	27446.7	35954.1	4779.06	36680.5	240.808	234.628	23155.8	40134.9	19516.2	13821.8	35954.1	29732.6	4909.85	16366.6	13752.8	2090.17	8760.43	12419.2	2773.87
610	MIA PaCa-2	849 2.7nM	6	26370.5	270.968	10981.9	220.964	729.967	14928.1	13121.4	20599	40945.6	29436.8	34544.4	34891.6	38177.4	8760.43	41357.1	455.775	944.825	23155.8	38177.4	21894.7	15882.9	43914.5	38561.1	5773.31	17659	16564.2	2760.04	9788.86	13200.4	4068.38
611	MIA PaCa-2	849 8.1nM	6	24100.8	155.866	10905.3	79.5193	584.642	14750	13160.8	19380.1	35242.2	24343	14328.4	18958.4	32532.7	2404.27	39340.1	259.563	334.956	23155.8	43044.9	20952.2	16155.2	39340.1	19850.8	2689.2	12670.1	11568	2160.29	7266.28	15599.6	3885.47
612	MIA PaCa-2	849 8.1nM	6	23623.6	195.195	11956.1	139.631	588.16	15677.8	14530.4	20910.4	39735.5	26903.2	13121.4	25591.1	34891.6	2426	42616.6	226.105	123.347	21960.5	37049.1	21960.5	15709.2	42616.6	21742	2098.55	12594.3	11181.3	1853.81	7832.21	13960.7	2517.45
613	MIA PaCa-2	849 24nM	6	23155.8	206.438	11070.1	269.078	525.316	13467	12246.6	16580.8	31571.2	24587.7	9926.87	11070.1	24100.8	1848.26	36315.5	212.3	215.078	20373.7	42192.6	22247.8	15108.3	40134.9	14058.7	1820.74	12161.1	11789.9	2026.37	7215.59	14016.6	4703.21
614	MIA PaCa-2	849 24nM	6	24100.8	251.389	11742.9	163.204	732.893	17361.3	14072.8	19244.9	40134.9	26635.5	11614.4	14385.8	26635.5	1655.73	41772.8	458.06	870.441	20272.1	37421.5	24343	15994.5	46166	16680.6	1343.46	17137.1	14228.5	2435.73	9127.07	15740.6	7427.91
615	MIA PaCa-2	849 73nM	6	21311.5	296.486	15214.4	268.272	715.513	20434.9	14972.9	19831	43044.9	25336.5	10147.7	12977.9	20973.2	1660.71	43914.5	346.887	383.753	21785.5	34200.6	23861	17396.1	51534.2	17413.5	1545.34	13440.1	12222.1	2130.26	11944.2	14958	5161.59
616	MIA PaCa-2	849 73nM	6	20681.6	251.892	12759.1	311.376	571.92	17034.6	14072.8	18901.6	40538.2	23388.5	9681.77	10046.7	20010.3	1542.25	42616.6	287.724	658.523	19614	35954.1	25084.4	15475.3	49513.5	15914.7	1590.81	12964.9	10561.8	2192.94	10636	14883.4	4745.73
617	MIA PaCa-2	Vehicle	24	19870.7	124.338	14242.7	234.862	444.522	16764.2	11147.8	19614	32532.7	32532.7	7495.06	24343	32532.7	2012.23	35954.1	97.3196	4.53999e-05	32859.6	42192.6	16415.8	18160.4	33189.9	49513.5	5931.31	16171.4	7562.82	2284.72	9681.77	15994.5	6266.67
618	MIA PaCa-2	Vehicle	24	17712	201.341	13373.1	229.522	535.392	15244.9	9730.3	18490.3	28853.9	28001.1	8308.21	27722.5	34891.6	2665.11	32859.6	126.343	4.53999e-05	34891.6	42616.6	17747.5	18361.3	30333.2	57526.4	6863.68	16898.8	7855.74	2438.16	9701.16	16106.9	6235.41
619	MIA PaCa-2	849 0.1nM	24	19034.3	144.315	13200.4	185.49	530.596	15693.5	11430	20414.5	32209	25848.3	8383.33	29143.9	33523.4	2026.37	35954.1	102.309	3.83052	33189.9	40134.9	17034.6	17274.7	36680.5	60475.9	8094.98	19091.5	9643.12	2221.64	8664.59	15306	3901.05
620	MIA PaCa-2	849 0.1nM	24	19555.3	123.594	11992.1	171.058	462.201	13766.6	11660.9	18453.3	28282.5	26370.5	6161.03	22697.3	30638.1	1672.37	37049.1	74.0692	4.53999e-05	32532.7	43044.9	17448.3	16663.9	31257.1	56387.3	6298.08	16010.5	11203.7	1647.48	8786.75	14342.8	4272.69
621	MIA PaCa-2	849 0.3nM	24	20516.8	165.339	13147.7	192.674	539.153	16663.9	12016.1	20150.8	31571.2	29143.9	7950.58	20910.4	31257.1	1840.88	37421.5	70.7392	4.53999e-05	32859.6	40134.9	16301.3	16155.2	35596.4	57526.4	6418.89	16432.2	9218.8	1815.29	9720.58	15214.4	5377.61
622	MIA PaCa-2	849 0.3nM	24	20030.3	278.662	13602.4	267.468	541.856	18306.3	12797.4	20150.8	28853.9	27722.5	7215.59	22471.4	26903.2	1450.99	37049.1	78.8069	103.337	29436.8	36315.5	15413.5	15584	30946	57526.4	5166.76	13213.6	10006.6	1790.05	9837.93	15962.5	4319.96
623	MIA PaCa-2	849 0.9nM	24	18694.8	175.915	14002.6	149.905	552.25	16881.9	12456.5	19751.8	28001.1	26108.1	5837.16	21504.1	24834.8	1380.22	37049.1	61.2522	4.53999e-05	30031.4	39340.1	15214.4	17783	31257.1	49513.5	6161.03	13453.6	7785.36	2558.05	7346.66	15930.6	4880.49
624	MIA PaCa-2	849 0.9nM	24	17465.8	97.028	13399.9	209.139	503.206	16697.3	13003.8	19516.2	28001.1	28282.5	5146.13	22026.5	27173.6	1571.84	38948.7	42.8198	4.53999e-05	29436.8	37797.6	16301.3	17908	33523.4	50011.1	5937.24	13240	9788.86	2447.93	7895.12	16881.9	4954.25
625	MIA PaCa-2	849 2.7nM	24	17783	181.817	14002.6	204.384	560.596	17623.7	12632.1	19673	30946	26903.2	5234.36	11637.6	21461.2	1371.97	40134.9	7.6983	4.53999e-05	27446.7	38177.4	16383	17890	29732.6	43477.6	3526.29	11754.6	6734.5	1943.02	8349.86	14559.5	4514.28
626	MIA PaCa-2	849 2.7nM	24	20171	187.729	12581.7	318.62	520.609	15428.9	12016.1	18920.5	24343	27446.7	5693.04	7816.56	17659	1171.45	35596.4	83.3459	4.53999e-05	28282.5	47572	18033.7	19360.7	24834.8	33523.4	3133.8	12569.1	9228.02	1874.32	8638.64	16123	4411.63
627	MIA PaCa-2	849 8.1nM	24	19264.1	259.823	14898.3	321.179	554.463	19015.3	13891	19594.4	32532.7	30031.4	4407.22	5653.33	11226.1	1242.65	46630	64.0075	4.53999e-05	22471.4	38948.7	17361.3	18977.3	22004.4	27173.6	2699.98	10894.3	6470.44	2855.49	9691.46	16252.5	6081.46
628	MIA PaCa-2	849 8.1nM	24	18069.8	114.206	12977.9	345.157	457.602	15914.7	12307.9	18160.4	35242.2	30638.1	4582.5	2898.65	8501.52	1326.1	45251.9	122.242	4.53999e-05	21247.6	43044.9	18564.4	18694.8	20994.2	22925.4	1603.59	13095.2	6406.06	2530.06	9348.77	17188.6	5848.85
629	MIA PaCa-2	849 24nM	24	17908	224.079	14676.5	344.812	580.564	18416.5	13346.4	19380.1	38177.4	30638.1	5229.13	1587.63	4798.22	1350.19	48050.1	114.778	4.53999e-05	19692.6	39340.1	18124.1	16564.2	18939.4	18269.7	632.07	12369.6	5255.34	3800.93	10270.2	14750	5721.58
630	MIA PaCa-2	849 24nM	24	19380.1	275.614	13588.8	340.699	551.146	14779.6	12569.1	18288	30031.4	27722.5	4831.92	1348.84	4398.42	1090.07	43044.9	93.7845	4.53999e-05	17606.1	46166	18106	16881.9	16697.3	14242.7	4.53999e-05	10883.5	6418.89	2844.09	10373.4	16764.2	8225.55
631	MIA PaCa-2	849 73nM	24	19110.6	271.239	14588.7	217.674	521.652	18160.4	13056	18416.5	33860.4	32532.7	5297.55	1205.92	3245.42	1403.89	46630	101.697	4.53999e-05	18920.5	42192.6	17465.8	19225.6	16203.8	12708.2	430.953	10137.5	5819.67	4052.14	10657.3	16881.9	5420.8
632	MIA PaCa-2	849 73nM	24	34891.6	219.642	14603.3	213.364	561.718	17712	12964.9	18939.4	34891.6	30946	4880.49	1090.07	3391.41	1270.29	48533	103.234	4.53999e-05	18269.7	42616.6	18564.4	18863.8	16252.5	13359.7	671.155	10036.7	4807.82	3428.92	10764.4	16564.2	3823.8
633	MIA PaCa-2	Vehicle	72	18732.2	130.974	13399.9	245.427	479.623	17623.7	10636	17854.3	25084.4	28001.1	4204.88	741.741	1531.5	1359.67	37797.6	21.0311	4.53999e-05	16514.6	45251.9	20070.4	17729.8	18807.3	25084.4	3684.9	12990.8	7368.72	2878.43	9633.49	15475.3	6647.53
634	MIA PaCa-2	Vehicle	72	17712	157.276	13426.7	184.565	458.518	14958	10229.2	16187.6	20578.5	29143.9	4376.48	675.869	1199.91	1634.35	40134.9	20.3687	4.53999e-05	14824	48050.1	22026.5	17908	17623.7	23623.6	3991.81	10732.2	7631.19	3449.55	9956.69	15093.2	5480.77
635	MIA PaCa-2	849 0.1nM	72	20191.2	188.105	13835.6	173.816	457.145	17943.8	10290.7	16252.5	24343	28853.9	4213.29	443.191	1280.49	1731.94	38177.4	7.11354	4.53999e-05	16203.8	50011.1	20353.3	16647.2	16647.2	24834.8	2570.87	10046.7	6329.65	2416.32	9623.85	16915.7	5872.29
636	MIA PaCa-2	849 0.1nM	72	20889.5	324.083	14676.5	206.851	675.869	18178.6	11081.1	17659	25084.4	30031.4	4759.99	699.944	1187.97	1664.03	41357.1	32.8516	4.53999e-05	14838.8	45251.9	21162.8	16898.8	18142.3	24587.7	2966.09	10016.6	7585.55	2708.09	10829.2	17413.5	7354
637	MIA PaCa-2	849 0.3nM	72	18342.9	166.501	12124.7	264.542	470.126	17943.8	9759.53	15962.5	24100.8	30031.4	4398.42	754.458	1469.97	1230.28	37421.5	13.9155	4.53999e-05	15017.9	38177.4	20475.8	14314.1	16187.6	25591.1	5203.05	9063.41	9996.6	3439.22	11896.5	15002.9	3487.71
638	MIA PaCa-2	849 0.3nM	72	18306.3	198.542	12161.1	254.169	527.949	17240.2	9946.74	15214.4	28001.1	30638.1	4851.29	750.695	1533.03	1303.75	39735.5	43.5104	4.53999e-05	14720.6	37797.6	18939.4	14030.7	16366.6	26903.2	6444.61	10509.1	9200.38	3284.6	12307.9	14256.9	4311.32
639	MIA PaCa-2	849 0.9nM	72	18269.7	165.67	11510.3	279.499	543.484	15787.9	9887.24	15490.8	28001.1	29143.9	4779.06	853.205	1742.37	1492.19	36680.5	35.6946	4.53999e-05	13082.1	38948.7	20826.9	13602.4	16010.5	25848.3	5218.68	10076.9	9063.41	3310.98	11203.7	14943	4505.26
640	MIA PaCa-2	849 0.9nM	72	19811.1	218.328	12112.6	290.906	516.461	16383	10488.1	15994.5	25848.3	27446.7	4610.08	821.392	1831.7	1350.19	35596.4	13.3298	4.53999e-05	12874.5	40945.6	20640.3	14486.9	13029.9	25336.5	4003.8	7266.28	8578.38	3171.63	12481.5	15740.6	7302.7
641	MIA PaCa-2	849 2.7nM	72	18124.1	223.408	11070.1	232.758	533.255	18694.8	10488.1	17783	37421.5	34544.4	5014.06	2030.42	3695.98	1439.43	41772.8	267.468	4.53999e-05	12076.3	30946	19594.4	12746.3	17854.3	34200.6	9292.85	11789.9	10861.7	4555.09	14750	14271.2	2525.01
642	MIA PaCa-2	849 2.7nM	72	18751	200.738	11170.1	296.19	539.153	19850.8	10700	18288	40945.6	34891.6	5508.24	1859.38	3940.25	1876.19	42192.6	245.427	4.53999e-05	11860.9	30031.4	20414.5	12695.5	18434.9	36680.5	9395.63	12295.6	11660.9	3889.36	14271.2	14385.8	3729.39
643	MIA PaCa-2	849 8.1nM	72	19990.2	236.512	10678.6	386.449	508.772	17309.3	11452.9	19970.3	41357.1	36315.5	6768.26	2824.26	8821.97	2237.24	40134.9	233.458	4.53999e-05	12357.3	33189.9	15677.8	12797.4	15459.8	27722.5	6707.62	11684.3	11092.2	4341.61	15662.1	14661.8	4319.96
644	MIA PaCa-2	849 8.1nM	72	19380.1	267.201	10970.9	406.263	591.7	17154.2	12246.6	20251.8	38561.1	32532.7	7115.28	3121.28	10270.2	2517.45	43044.9	317.984	4.53999e-05	11884.6	35242.2	16026.5	14314.1	15772.1	29436.8	7009.35	11384.4	11789.9	4328.6	15630.8	14443.5	3206.71
645	MIA PaCa-2	849 24nM	72	18863.8	281.744	8769.2	275.889	492.256	15851.2	10668	19360.7	43477.6	30031.4	9749.78	3543.96	9887.24	3526.29	43044.9	812.406	526.894	9452.18	28566.8	13082.1	10732.2	14285.5	26108.1	9788.86	13863.3	13521	5276.4	14735.3	12670.1	1937.2
646	MIA PaCa-2	849 24nM	72	19053.4	276.442	8760.43	338.323	437.904	14314.1	10840	18453.3	40538.2	29143.9	9246.5	3245.42	10916.2	3287.88	45251.9	607.286	334.956	8760.43	30946	13174	10970.9	13507.5	26108.1	8433.78	15740.6	10818.4	4376.48	12594.3	11259.9	3561.73
647	MIA PaCa-2	849 73nM	72	20806.1	319.258	8991.19	336.635	563.969	16236.2	13739.1	20455.3	45706.7	31571.2	13904.9	2983.94	11614.4	4255.64	46630	805.127	596.453	7974.47	29732.6	12913.1	10861.7	11521.8	24100.8	7420.49	14868.5	11248.6	4614.69	15506.3	12052.2	2465.13
648	MIA PaCa-2	849 73nM	72	20660.9	307.047	8982.2	394.65	546.755	15914.7	12657.4	21938.5	38561.1	27446.7	13904.9	4105.16	12964.9	5563.59	53637.3	1048.38	353.541	9200.38	37421.5	15078.1	13467	13426.7	26108.1	6925.74	14943	11896.5	4167.2	16597.4	11579.6	3411.82

## Sheet: Avg data
Model	Description	Time point (hrs)	EGFR_Total	EGFR_Y1068 (Lower values had high CVs)	EGFR_Y1173	HER2_Total	HER2_Y1248	HER3_Total	HER3_Y1289	c_Raf_S338	Raf_S259	B_Raf_S445	p70S6_Kinase_T412	S6_Ribosomal_Protein_S235_S236	S6_Ribosomal_Protein_S240_S244	ERK_1_2_T202_Y204	ERK_1_2_Total	AKT_S473	AKT_T308	4E_BP1_S65	4E_BP1_T37_T46	4E_BP1_T70	MEK1_S298	MEK_1_2_S217_S221	c_Myc_Total	c_Myc_S62	p90RSK_S380	p90RSK_T359_S363	Caspase_3_Cleaved_D175	MHC_Class_I	HLA_DR	HLA_DR_DP_DQ_DX
H1373	849 0.1nM	6	35270.4	634.397	7585.98	144.932	896.84	14173.5	13492	22015	26635.5	23634.2	23042.9	37620.8	51023.9	7387.84	17996	384.916	889.445	24465.3	39743.4	16572.6	20401	23988.1	24105.6	7411.4	19930.4	26140.7	3152.69	8069.98	22182.5	34064.5
H1373	849 0.3nM	6	38966.2	755.576	8382.71	204.291	1032.36	16370.9	13744.3	24431.8	29517.7	22024.7	27642.5	42956.2	45936.4	9254.65	20650.6	343.336	394.198	24130.9	36054.7	15153.8	17997.9	25209.9	26478.4	6446.32	18883.9	22470.7	2830.75	7797.65	27615	33875.6
H1373	849 0.9nM	6	40953.8	1031.08	11553.7	214.697	1289.88	20045	16452.4	28433.2	29747.5	22016	28589.6	48688.4	44810.6	7510.53	18239.5	264.81	378.142	21165.2	33271.2	14563.4	20706	26865.8	27408.5	4813.55	17128.6	17308.8	3215	5367.43	22032.4	25748
H1373	849 2.7nM	6	38778.2	994.061	11096.4	223.974	1168.36	18435.7	16483.5	25029.5	26821.7	20925.3	22628.9	33843.6	39735.5	5234.18	16458.6	218.546	252.855	20150.8	35875.5	14242.8	18471.8	23071.3	22061.7	3588.92	14079.2	16886.1	3481.53	6261.22	21772.5	22004.1
H1373	849 24nM	6	34040.7	1119.85	11420.5	154.58	1261.63	17206	16779.7	18465.3	21300.9	17694.6	16156	20640.5	35102	2051.74	14429.8	110.099	242.944	14847.5	37632.1	14329.1	18643.8	20656.8	13808	1955.1	9451.84	11662	3729.76	5232.71	20232.7	26213.9
H1373	849 73nM	6	33525.1	1455.67	14466	197.409	1530.45	22698.4	18657.9	19066.2	25502	17402.9	14767.6	25489.3	32215.4	1628.03	17668.3	168.434	381.975	14127	30032.9	14141.6	17431.4	24713.7	16983.6	2653.85	9381.69	10070.7	5187.53	7416.93	23883.7	26382.3
H1373	849 8.1nM	6	36687.8	929.381	12709.4	207.369	1061.35	18520	16540.1	22105.7	24186.5	18906	13863.4	33040.1	44391.3	2295.52	16199.1	172.639	175.626	17166	35298.6	14637.4	18803.5	21828	16988.1	2116.9	12094.4	13589.2	3645.99	5456.58	21300.4	32852
H1373	Vehicle	6	37814.6	1689.29	12620.8	196.197	1526.43	18492.4	17863.3	25235.6	24421	20112.5	20749.3	42430	45727.3	6555.56	17380.9	142.727	37.7073	24347.9	41375.7	14950.8	22025.7	25095.7	27174.9	3509.55	17598.3	14423.8	2050.93	7631.21	23388.1	24962.1
H1373	849 0.1nM	24	34033.9	1159.81	15040.8	180.737	1252.72	22044.1	17492.8	32539.2	29157	20979.9	26785.4	63902.4	46911.2	7450.44	19741.9	355.692	223.851	22943.7	29756.4	10125.8	19183.4	27728.1	34030.5	4251.06	18744.5	12297.5	4548.47	7323.17	25931.1	30651.9
H1373	849 0.3nM	24	35419.3	1272.08	14862.4	201.349	1249.67	22041.7	17150.8	31101.5	28433.2	21391.6	25602.6	58715	44821.8	6504.96	19999.2	245.04	42.5148	25337.7	33867.1	11702.2	19458.9	27174.9	33525.1	3441.21	16789.6	11814.1	3365.74	7332.18	24588.9	26635.5
H1373	849 0.9nM	24	34050.9	799.111	15093.5	154.087	1011.84	22137.2	15469.9	30339.3	25849.6	22071.3	20062.4	54481.3	51277.8	5137.09	18752.7	590.399	162.438	25859.9	35102	11622.3	21016.4	25479.1	29732.6	3449.91	15946.3	10636.3	3732.16	6244.78	24224.3	29691.3
H1373	849 2.7nM	24	35070.4	949.545	15749.8	200.647	1088.93	24718.6	15445.3	29584.7	27587.3	22926.5	19173.3	59612	48571.9	4261.84	21440	493.112	7.837	26777.4	34893.3	12200.4	20435	26241.9	29293.3	2738.93	15567.9	10312.8	3277.98	6665.31	25398.6	30801.3
H1373	849 24nM	24	28566.8	643.503	13143	168.305	794.482	19617.6	12528.1	19468.3	17943.8	18958.4	11834.5	28853.9	44801.6	2486.13	17199.8	390.536	15.3767	22926.5	46412	14014.9	21873.4	15925.6	11963.5	633.817	8082.85	7077	2643.98	6654.58	19382.5	24735.9
H1373	849 73nM	24	30185.4	596.397	15685.6	190.934	858.793	31433	13753.8	22930	29307.9	25463.8	15882.4	47108.1	46911.2	2421.28	24224.3	676.172	296.784	21271.3	33691.9	15631.8	21614.7	20254.4	15080.6	1076.43	8683.19	6253.41	4492.71	8091.97	27864.6	38887.4
H1373	849 8.1nM	24	31890.1	757.873	15382.7	202.343	916.79	25225.5	14707.7	23862.2	24502	21589.6	12675.2	54176.3	54745.5	2657.29	20702.8	331.542	53.8143	25735.1	37609.5	12028.1	19920.5	20879.2	18983.3	1800.93	11652.6	7900.57	3821.27	7005.49	25466.3	35135.4
H1373	Vehicle	24	33204.8	919.879	15314.5	214.167	1006.78	20336.1	14654.5	32096.8	26191.7	21912.8	33003.9	50818.3	45506.6	9551.71	16417.9	316.493	29.8999	26403.4	37421.5	11714.8	21046.8	24272.8	23642.5	2572.99	16436.2	9283.57	4208.14	7489.38	22323.1	25591.1
H1373	849 0.1nM	72	40348.6	668.135	16069	244.216	851.076	30651.9	14640.1	32234.7	37257.6	32885.9	11259.9	54179.1	45941	5069.52	26656.8	795.381	162.353	19487.1	32696.1	17718.3	20983.7	25210.4	24607.3	3603.72	16714	11333.2	3754.75	8313.37	21484.7	17748
H1373	849 0.3nM	72	37799.5	734.996	13135.3	254.042	855.115	28013.7	15254.3	28568.2	31572.8	29307.9	11265.3	35612.4	42226.3	4640.51	22359.6	696.821	707.17	18278.5	31282.1	16280.6	18590.4	20682	20035.1	4268.88	12941.1	13987.6	4199.33	9822.69	21145.5	17784.1
H1373	849 0.9nM	72	36868.5	741.59	13836.4	269.073	870.614	28333.5	13920.2	27173.6	33366.7	28998.9	11950.9	40481.8	37805.1	5005.16	22930	518.295	272.535	17614.9	28877	15321.9	17370.1	20516.2	21003.6	4263.8	13692.2	13069.3	4456.65	9638.45	22511	19091.2
H1373	849 2.7nM	72	39348	1158.39	13590.5	263.753	1285.1	34551.3	17570.3	26382.3	36069.3	34284.5	10074.2	47593.4	45574.8	2369.66	28579.6	606.022	653.924	16182	26375.7	14437.8	17512.3	19706.9	23880.1	7172.32	11765.9	15636.1	5225.81	11483.8	26768.8	26383.7
H1373	849 24nM	72	27452.2	773.669	10546.9	252.126	818.647	25978.2	13327.2	19431.6	25745.4	28753.4	7777.32	24967.1	37313.5	1982.37	31282.1	792.595	448.015	10161.5	27861.8	11598.8	13619.3	12774.6	14531.7	6365.89	10971.4	13835.5	5465.05	9707.17	25653.8	31966.6
H1373	849 73nM	72	25218	778.311	10288.7	236.236	843.168	28006.7	12823.7	17250.8	25993.8	29602.5	7599.43	22904	34468.8	1740.74	35904.1	649.419	311.071	10174.6	29738.6	13131.9	13166.7	11895.9	19060.1	5687.62	9232.09	11639.5	4847.8	9247.83	28504.3	31414.1
H1373	849 8.1nM	72	30946	749.104	11833.7	254.865	837.77	27054.6	13879.5	22263.2	28859.7	28427.5	8664.31	27513.9	33862	2366.23	26636.8	622.075	550.026	12271.8	26936.8	12508.3	14072.8	14810.7	16173.9	4262.82	9655.4	12016.1	6179.11	10910.8	26785.4	29430
H1373	Vehicle	72	38950.6	582.505	16286	244.154	807.38	29001.8	14077.6	29926.9	33862	28853.9	12657.9	47839.8	46166	6805.48	22704.5	747.034	513.118	18615.6	31748.9	16081.2	19699.8	24467.8	21348.9	3348.34	15323	11585.8	4503.31	8384.03	22372	17406.3
H2030	849 0.1nM	6	17544.6	123.121	9016.11	850.972	401.404	15859.7	11850.5	22359.6	14864.2	9200.94	47363.7	19686.9	23624.7	67629.5	27722.5	10503.9	13703.6	13665.6	24967.1	6852.57	17606.3	16363.4	11655.1	460.038	15530.6	15590.4	5359.18	5022.35	11758	1941
H2030	849 0.3nM	6	19160.8	106.818	8658.02	891.148	416.849	15656.7	12558.4	22020.1	14637.7	8808.06	45031.3	17615.4	23274.5	55339.9	27174.9	8081.73	10025.1	13214.1	26004.2	6398.22	17004.6	14249.8	12379.1	288.04	13161	14003.8	4626.81	5361.46	13414.5	4552.07
H2030	849 0.9nM	6	17011.9	93.2278	8849.75	790.259	399.299	14703.7	12856.3	21596.8	12685.9	8421.22	34407.8	15078.2	22388.2	37513.2	22866.9	5860.53	7463.78	11224.3	25986	6571.56	16848.7	14476.5	8074.87	350.529	10223.9	8553.14	7203.68	5212.69	10245.1	1136.72
H2030	849 2.7nM	6	18079.4	96.4428	12588.6	820.542	458.305	17129.1	13302.8	23047.5	15296.9	9509.64	36726.3	18565.2	25604	22533.2	29129.5	5594.97	6967.04	13370	29180.3	7747.04	19334.1	16641.3	9591.41	412.589	11173.7	8393.7	6359.72	4952.44	11065.7	3559.99
H2030	849 24nM	6	16262.1	119.925	10045.9	907.743	463.407	15764.9	12928.6	17637.4	14128.7	9777.37	29084	8879.86	19019.6	2916.04	25555.5	3888.61	5304.32	10409.6	26129	6611.66	15701.9	13761.4	9122.37	1544.69	8660.14	7968.7	7578.81	8172.89	12049	3054.65
H2030	849 73nM	6	17496.1	140.372	11999.9	1029.11	443.478	18057	12684.8	17225.2	14736.7	9532.87	25519.1	14325.1	20377.8	2349.19	26668.8	4654.57	5866.42	11552.1	27310.1	7919.04	15603.7	14159.8	7262.67	1531.33	8736.92	5547.16	8071.06	8734.2	12428.4	4135.58
H2030	849 8.1nM	6	17227.9	68.7509	10404.6	892.137	421.041	16002.7	12720.9	19641.3	14306.9	9354.57	26518.9	17545.3	24713.7	5913.61	25225.5	5312.68	6780.63	11518.2	28150.3	7679.9	17283.5	13286.8	7365.64	575.537	7343.55	7410.73	6906.37	7801.5	12009.1	3868.22
H2030	Afat + 849 0.1	6	16171.4	16.3769	13668.5	863.92	386.848	17005.4	11453.6	22811.3	12763.4	9089.78	17675	15209.8	23279.1	7556.63	22591.1	913.829	2144.03	10108.5	27864.6	6430.2	13366.6	11948.9	7166.69	1961.62	8875.05	7441.59	10716.5	9293.31	12016.4	4954.16
H2030	Afat + 849 0.3	6	16149.4	11.0957	13981	767.062	399.002	17373.6	11658.3	23286.1	13181.8	9121.03	16808.6	14323	21364.4	7025.56	24229.2	924.969	2034.9	10605.8	28504.3	6729.64	14570.8	11950.8	7119.69	1916.66	8862.85	6823.99	10035.3	7782.62	10929.2	3249.31
H2030	Afat + 849 0.9	6	15376.2	25.0793	14069.6	801.121	383.627	17181.1	11655.5	21284.4	11422	8982.65	12703.7	14209.8	24354	3894.19	22104.2	840.334	2281.13	9846.57	28141.8	6793.03	12875.5	11460.2	6361.69	2134.92	7424.31	6075.28	11476.2	10501.9	10331.5	3992.25
H2030	Afat + 849 2.7	6	17757.4	26.6968	14037.9	816.072	380.054	18903.2	11402.2	21483.3	14494.6	10355.9	19749.9	15014.7	22361.9	3031.27	27041.1	539.72	2029.2	11577.3	30970.8	7201.87	14110	13794.2	6726.7	2406.77	6849.69	6726.7	9866.09	9333.06	11295.4	3024.89
H2030	Afat + 849 24	6	16552.3	28.1148	13896.1	751.999	372.121	17154.4	10462.2	17353.4	11837.2	8193.77	12319.5	9461.24	20427.5	1536.1	24587.7	522.976	1861.02	11430.4	32558.7	7594.51	14234.9	10845.5	4968.26	2083.12	4936.69	4874.32	10458.9	8522.63	12530.5	4030.65
H2030	Afat + 849 73	6	17809.7	28.4167	41939	669.018	340.482	16309.8	9735.19	16572.7	12250.2	8817.8	14953.8	9452.61	22009.3	1443.82	22586.2	1128.56	2967.09	10916.5	31928.3	8030.23	17180.7	10943.7	4661.08	1866.74	6603.3	4939.82	10562.1	8385.95	10802.6	4511.56
H2030	Afat + 849 8.1	6	17235.6	27.2236	61713.1	770.504	373.578	17902.1	10688.9	18026.1	13690.4	8425.21	14735.7	11003.9	22205	1729.48	23156.9	586.496	2491.42	10813.8	31132.7	7169.6	14722.7	11850.8	5126.61	2326.22	6336.03	5398.09	10906.6	9523.53	10563.9	4012.46
H2030	Afatinib	6	19070.7	17.1805	17083.5	678.994	327.615	18044.4	10097.1	23980.9	13801.3	10551.3	20426.3	14959.4	23988.1	13338.9	26904.5	2758.99	4461.32	11689	32390.2	9803.99	17606.2	12170	6729.41	2227.04	12582.5	6162.53	9838.52	8311.14	12855.2	5175.49
H2030	Everolimus	6	16128.8	79.205	75295.1	895.055	463.395	18953.9	13566.2	25993.8	16162.1	10486.9	6425.66	277.087	910.333	49999.5	27468.6	6544.31	7007.18	8313.37	34935.2	5762	13710.7	15163.5	8272.36	2998.84	21824.2	9200.84	9502.4	8308.58	12396.2	4897.85
H2030	Everolimus + 849 100nM	6	17288.6	166.259	13753.8	876.566	557.19	18886.1	14431.5	19197.1	12471	10335	3748.71	174.682	635.372	2404.11	30970.8	3788.04	3902.29	9297.04	37844.8	6099.33	14826.2	13234.1	6490.96	2463.93	10769.9	7175.95	7550.89	8821.97	12820.4	5606.79
H2030	RMC	6	18304.9	94.5227	12394.6	734.443	374.663	16890.2	11649.6	21851.1	13251	9866.84	27481	13502.2	25212.9	4133.01	25722.3	3754.1	5452.76	12883.1	32051.9	7847.91	18235	12149.7	5787.96	2181.52	7767.11	5244.75	11157.6	8734.72	11551.9	5166.84
H2030	RMC + 849 0.1	6	20177.3	132.332	13109	805.057	406.112	17651.7	12500.2	22219.7	13239.6	10743.1	16178.8	13014.3	25463.3	3194.86	28566.8	3217.12	3802.79	13358.7	32715.8	7615.82	16998.5	11395.7	5896.12	2669.36	7283.01	5142.12	9646.64	8376.03	11532.5	4771
H2030	RMC + 849 0.3	6	21478.9	113.002	11284.7	824.281	399.597	17301.1	11228.4	20281.8	15237.5	11200.9	25281	12107.8	23910.2	3206.71	28568.2	4985.44	6976.48	13058.7	30488.7	9535.01	16374.1	12626.3	6356.7	3863.34	9020	6385.88	10840.2	8887.93	13686	6015
H2030	RMC + 849 2.7	6	25592.4	132.766	11882.2	910.706	448.781	17897.4	12210.2	18216.9	15616.2	11669.3	29989.7	16731.7	28282.5	1821.8	33725.6	6017.36	7811	14737.2	32549	9859.26	16496.4	12791.5	6535.18	4629.75	7715.54	6650.11	12431.6	8757.18	16613.8	7977.31
H2030	RMC + 849 24	6	26129	120.548	10104.9	880.288	387.251	17432.5	12021.6	15590.3	13492.7	9213.64	21855.9	17118.1	29882	1730.99	35249.3	5838.05	7623.57	13554.6	28946.3	9925.93	18317.1	10759.1	6708.96	4612.45	7735.75	5437.88	14954	8737.28	18724.1	6575.12
H2030	RMC + 849 73	6	28427.5	112.758	10281.1	851.112	353.031	16415.9	11860.9	14787.4	13117.3	9841.97	18837.9	15938.9	28424.7	1375.6	32048.7	5018.72	5938.55	14142.3	30822.9	9902.62	15714.9	9824.51	6371.69	4292.35	8267.1	7519.61	13780.4	8634.9	15189.8	8065.74
H2030	RMC + 849 8.1	6	24834.8	123.251	12070.3	901.125	424.197	15154.5	11894.4	15041.5	11790.6	9085.59	19387.9	7412.56	21017.4	1373.41	26370.5	4460.36	5782.42	12569.2	32534.3	8898.96	13829	9656.83	4815.58	2932.25	7087.8	4499.25	11884.2	7913.4	17058.8	7596.76
H2030	RMC+ 849 0.9	6	21332.8	95.1488	11966.4	740.615	379.11	16261.3	10716.2	18466.7	14154.7	9560.17	22934.8	13494.6	24967.1	2495.9	27592.9	5721	7288.51	13193.8	32403.2	9492.71	15483.1	11525	5348.06	2663.8	8122.22	5328.42	10285	7727.79	13290.3	5933.55
H2030	Vehicle	6	16888.6	100.389	12168.6	816.134	455.733	16165.4	13789.6	25012	14349.1	9137.59	41564.1	16049.2	21731.1	58342.4	23904	10777.7	12656.5	12321.7	28433.2	6391.25	16125	15747.7	9076.12	1639.35	15300.6	9520.5	8136.88	7819.13	10856.4	3108.93
H2030	Vistusertib	6	19148.9	99.5474	14712.4	935.45	509.541	19442	14187.7	25623.1	12404.3	10103.4	7176.09	267.042	729.048	94470.1	29145.3	188.305	3687.31	1253.79	7795.24	1865.06	16301.4	16984	7632.72	2283.23	26247.1	10180.6	6572.89	7607.46	12358.6	5064.72
H2030	Vistusertib + 849 100nM	6	19187.8	183.319	16327.7	1009.81	505.653	20579.1	14109.3	18483.9	12009.9	9358.56	3923.89	116.376	404.802	4645.21	34606.6	117.673	2322.84	1226.12	6547.37	2116.73	16991.7	15169.6	7235.33	1813.04	11740.5	7235.82	6674.06	9325.54	13611.6	5691.57
H2030	849 0.1nM	24	23274.5	214.43	10203.8	871.255	585.682	17624.1	13972.9	21149.3	17060.3	10859.2	27453.1	15864.6	27433.1	37430.3	30200.5	3637.72	2140.46	20139.7	27065.4	7234.93	18010.7	18835.2	14221.4	1694.54	17094.7	17442.8	3307.56	6716.42	13389.3	4422.87
H2030	849 0.3nM	24	22715.4	232.825	9091.19	755.727	503.91	16079.9	12719	19676.4	14572.6	9694.05	26503	15748.8	28905.8	36210.8	28220.7	3488.48	2297.72	21937.7	29584.1	7487.05	19342.1	17175.3	12607.7	1786.81	16831.6	12963.2	3049.61	4105.33	14633.9	4076.65
H2030	849 0.9nM	24	21047	213.668	10033.6	793.559	583.877	19050.5	14709.4	22173.3	16493.7	10423.7	18515.7	23042.9	32223.5	17734.1	30333.2	4318.2	1965.51	19955.1	26924.7	7371.21	18350.3	19328	11872.9	817.195	12895.1	12907.8	4536.58	6616.83	13115	2627.19
H2030	849 2.7nM	24	22026.5	243.107	10042	832.565	593.536	21313.8	15176.5	21036.4	16320.9	9785.64	19335	21260	32051.9	11607.7	32696.1	4582.5	2270.81	21341.4	28602.5	8205.29	19025.1	20374.5	11808.1	436.659	11316.6	11258.8	4104.75	5012.14	13115.4	1631.81
H2030	849 24nM	24	20944.3	281.68	12309.9	969.432	651.479	23388.5	16739.5	23272.2	17190.5	10096.1	30339.3	22502	32374	9004.99	35598.2	9452.47	7416.86	21203.8	30085.5	7682.28	21122.3	19814.2	10702.6	1260.66	10061.9	8746.33	5054.12	7897.79	15184	5046.7
H2030	849 73nM	24	19772.4	255.827	13460.4	1014.02	619.815	22813.6	16058.8	21536.4	17536.9	10716.6	24480	20870.7	28433.2	6027.34	35982.9	11420.5	8400.11	19405	29157	7868.88	19338	19228.8	9490.18	2154.59	9329.21	7465.48	6071.52	10615.8	12847.9	3856.52
H2030	849 8.1nM	24	19439.7	260.995	11690.3	892.493	598.417	19663.5	14974.4	19882.8	16508.8	10513.2	15939.9	20879.3	32249.2	5756.11	32223.5	5649.74	2738.95	18008.5	27481	7566.46	18263.4	18799.4	10494.7	1434.24	8333.94	10149.9	5222.73	8583.23	14186.8	4451.1
H2030	Afat + 849 0.1	24	18518.9	18.1923	14572.3	806.577	423.266	21258.8	11568	24100.8	16321.9	10467.7	14633.7	14345.8	24839.7	8236.49	31258.6	1506.78	2900.13	18698.1	30644.3	9336.83	17793.1	18233.4	9127.14	2390	12544	8667.02	7189.59	9823.72	13528.8	4410.24
H2030	Afat + 849 0.3	24	19140.2	23.3116	14508.7	781.907	397.085	21516.6	11419.6	23749.4	16697.3	10548.9	13845.1	12672	23980.9	7640.81	33191.5	1407.86	2640.52	19029.6	33044.6	10082	17818.6	18509.9	9349.44	2498.96	12167.2	9696.31	6480.39	10588.3	14099	4282.07
H2030	Afat + 849 0.9	24	16148.7	39.2511	13911.9	718.9	427.325	22750.8	11772.2	23331.9	16998.7	11965.8	11463.6	12546.5	24373.4	4282.92	31838.3	1644.95	3514.72	17393.6	31610.7	9834.11	15671.4	18165.3	9577.54	3894.71	11168.2	10331.4	7876.02	11216.4	13443.2	5177.33
H2030	Afat + 849 2.7	24	17731	34.2858	14052	699.432	410.19	20630.2	10982.4	21604	15269.6	10393.8	10347.9	7195.15	19594.9	3561.94	32866.2	1252.54	2836.77	16712.9	34228	10330.7	15938.5	17404.8	7942.89	2649.92	10333	8383.66	7433.67	11555.5	13719.6	3299.18
H2030	Afat + 849 24	24	19219.3	30.8571	14437.6	735.272	390.93	25773.7	10470.7	20103.1	16257.3	10545.8	9421.79	6506.31	17763.6	2677.76	37613.3	1487.04	2969.06	16517.3	32706	10258.7	16782.6	15732.8	8054.87	2822.19	9326.04	6372.83	7950.9	11945.7	14451.4	6861.35
H2030	Afat + 849 73	24	18574.9	24.1808	14859.9	676.937	377.719	23569.2	10849	21361.8	14188.6	9723	9028.56	5499.57	16107.3	2309.6	31729.2	1509.57	3458.02	14960.5	29756.4	8333.21	17010.2	12756.5	6102.08	1943.62	5497.14	4811.97	11177.4	9814.78	13645.5	3763.17
H2030	Afat + 849 8.1	24	18519.3	16.642	15181.8	762.302	374.833	21811.6	10337	18997.6	13848.7	9458.07	8360.24	4957.18	16209.3	2549.81	32118.3	1352	3108.8	15414.3	35087.9	10292.4	16384.4	13768.4	6453.35	2419.12	8354.69	6573.04	7763.19	10818.3	14366.3	4520.65
H2030	Afatinib	24	19459.7	30.8941	14292.7	698.015	366.334	25849.6	10261.6	26391.6	19231.8	12052.9	17369.6	19355.4	28013.7	12153.3	37235.3	2279.11	4376.44	21572.2	31571.2	9996.88	19007.3	19167.7	10484.8	3757.48	13119.3	8784.33	8506.53	11684.6	15336.7	5969.99
H2030	Everolimus	24	20031.2	146.045	14919.9	861.586	465.844	21017.4	13644.8	26924.7	13491	11713.7	6348.82	296.2	524.008	73762.7	33862	3579.8	11705.3	15014.2	37844.8	6565.38	18012.6	16721.4	8968.74	3577.94	21928.3	8918.92	7595.71	10263.6	14523.2	5648.12
H2030	Everolimus + 849 100nM	24	19313.2	278.453	16194.1	946.462	566.22	25382.1	16090.8	23279.1	13303.2	10679.6	4390.79	162.077	225.053	4902.06	40754.1	3014.47	9859.99	15421.9	33538.5	6348.87	17391.8	16271.4	8858.6	2562.66	11066.9	6384.25	7997.48	11854.9	14207.9	5151.55
H2030	RMC	24	20848.8	258.526	14303.9	893.505	559.234	21424.2	14136.5	27078.9	18063.1	10798.1	26630.7	23571.9	28710.3	6372.21	33143.7	13999.9	14167.2	20575.9	29436.8	7233.74	17465.7	16251.2	8519.81	3778.77	8700.28	7495.28	10630.7	8579.68	13822.6	5252.2
H2030	RMC + 849 0.1	24	20000.5	294.489	14197.2	824.16	555.22	22988.3	14186.9	26647.5	17089.2	10667	23513.1	26155.1	28727.6	5335.97	33360	12213.7	11861	21099.7	28877	7376.47	17219.1	16149.9	8617.54	3365	8262.67	7226.05	9696.58	10673.3	15241.2	5898.48
H2030	RMC + 849 0.3	24	21966.3	193.976	76304.7	897.598	528.509	21317.6	12721.3	23272.2	38395	9210.61	22267.9	15392.1	26247.1	4273.73	28284	14581.2	16468.4	17959.2	27386.6	7377.33	15760.5	13954.8	7087.23	4018.2	7274.5	6870.88	11544.5	9429.42	15005.9	6208.44
H2030	RMC + 849 2.7	24	25727.4	221.687	12052.2	902.87	559.655	19936.6	13994.9	21647.7	17089.9	10557.8	23995.3	18100.8	27459	2760.49	33360	21167.1	23983.3	19881.3	28453.1	7950.06	15940.3	13461.4	7418.19	4400.62	7720.88	7657.63	12484.6	9978.88	18427.1	7727.57
H2030	RMC + 849 24	24	28566.8	281.748	10870.4	850.546	484.688	17857.9	12913.4	17171.7	13502	10181.4	14702.5	13607.7	29290.3	1673.35	34030.5	13556.1	11357.7	18893	30795.2	8946.88	16683.9	12280.9	7511.59	7125.97	8712.29	10281.8	12813.3	8891.99	17715.9	7286.47
H2030	RMC + 849 73	24	26391.6	268.823	10112.8	791.306	569.552	17143.6	14015.3	16692.4	12220.4	9533.88	14784	15137.5	32441.1	2187.03	36662.4	14532.6	12964.5	21184.9	34933.7	9591.12	19340.9	13942.3	8580.91	8312.57	11052	10344.4	13005.1	10879.6	19268.8	8544.57
H2030	RMC + 849 8.1	24	23398.1	230.061	10845.5	788.228	502.501	18106.7	12100	17106.1	12863.7	8876.06	14825.9	12172.1	26095.2	1986.32	29685.9	14340.8	11411.9	19858.8	32048.7	8469.92	16330	12014.6	6965.75	2998	6466.22	6555.11	10276.1	10734.5	18518.1	11192.6
H2030	RMC+ 849 0.9	24	22187.1	216.404	14989.9	1657.34	546.768	24246.1	12861.8	22128.5	15266.9	8817.6	18917.9	15218.6	22238.2	3374.09	28683.7	13433.2	17924.5	14982.2	27130.8	8803.17	15895.3	11200.5	6875.47	2848.42	6511.03	5662.27	11821.8	11193	15973.3	9006.22
H2030	Vehicle	24	19381.7	225.015	22292.4	940.511	589.297	19405.5	14581.7	26241.9	17733.5	11153.4	32225.1	23312.4	31258.6	57184.9	31733	6275.31	3342	20779.2	29351.9	7578.82	17397.6	22225.2	12990.6	2885.58	21891.4	11235.4	6203.47	8281.65	11083.1	3234.86
H2030	Vistusertib	24	16764.7	132.381	16697.8	736.467	572.355	18714.7	15077.6	25104.4	8548.99	7881.26	5422.18	183.449	406.828	72308.6	24912.7	446.514	12219.1	1754.58	10257.5	2083.06	12203.6	15204.1	7842.2	3175.38	20225.5	7553.51	12849.2	8916.44	11594.1	4828.24
H2030	Vistusertib + 849 100nM	24	15966.1	265.268	21505	750.861	638.461	18905	15756.5	18124.6	6580.51	6295.21	3173.65	123.602	232.474	3477.2	25115.7	232.293	7720.39	1178.79	8138.64	1872.2	13369.2	12716.9	6023.7	2317.68	8723.5	6790.58	10417.2	8526.04	12371.9	6558
H2030	849 0.1nM	72	21764.3	154.558	67787.8	974.768	586.568	17094.6	14003.3	15702.4	15221.7	10064.6	10770.6	25062.3	34393.1	7982.85	33712.1	465.993	579.223	22935.7	31699.1	8778.6	21906	20394.9	10830.2	643.516	19971.7	18854.9	3037.99	4536.44	13599.6	1576.14
H2030	849 0.3nM	72	23529.5	232.068	9654.67	983.003	568.216	15414.1	15294.4	16318.5	12299.5	9774.53	11791.1	21127.3	35066.9	10025.5	32048.7	629.648	1046.7	23156.9	33028.1	8103.41	22009.3	20375.4	9829.58	1799.21	20092.2	19809.6	3597.74	5329.53	14391.4	3907.98
H2030	849 0.9nM	72	19970.3	169.22	10878.1	933.193	571.22	19566.8	15835.4	18287.4	12829.5	8778.5	10011.1	20962.7	30644.3	8037.78	31729.8	1164.57	535.702	19391.3	28013.7	7709.06	18728.9	19930.6	9306.99	218.321	16228.7	13050.2	5067.44	4802.56	13662.5	3474.31
H2030	849 2.7nM	72	21856.8	243.26	10898.6	921.134	707.119	19397.6	16711.9	18901.7	13002.6	9750.7	11081.8	20131.8	32558.7	7112.29	32900.7	1420.86	956.269	20094.5	29299.1	7413.52	19256.9	20550.2	10281.3	992.04	16891.7	13982.1	5152.31	5872.61	12674.6	1545.41
H2030	849 24nM	72	21972.4	249.649	12662.8	956.215	744.238	20778.1	18191.9	20683.3	12712.1	9249.06	12396.4	19633.7	33530.1	8356.21	36920.1	3864.64	1339.57	19281.1	31628	7563.97	20958.9	21261.4	8329.66	768.55	17317.1	14355.1	5345.77	10233.9	13961.7	5294.97
H2030	849 73nM	72	21475.1	264.608	14789	1008.79	686.787	24402.7	18503.7	22586.6	17100.7	11243.9	14278.6	22668.1	28855.3	8100.76	40134.9	7756.6	2762.85	18193.9	28770.6	7652.99	18761.6	21984	8689.33	1215.09	18391.8	10594.3	5507.47	11042.5	13383.5	5290.26
H2030	849 8.1nM	72	21000.9	213.317	12988.8	936.465	633.533	22584.4	17624.1	21506.2	14991.8	9640.04	11655.1	23281.7	32390.2	7574.75	35955.9	3021.17	1037.42	19937.1	29442.7	7540.55	21282.1	21419.2	8820.33	520.603	15845.8	11751.4	5153.59	8963.91	16476.9	5394.76
H2030	Everolimus	72	22467.5	127.575	12642.3	845.151	485.172	19896.5	14010.3	26656.8	12375.6	11268.9	8154.28	195.266	479.595	82877	38754.9	5321.22	13741.8	16098.8	34893.3	6409.5	16230.3	15934.9	8476.2	3833.41	19216.1	9504.73	9327.02	10982.9	15788.2	9007.15
H2030	Everolimus + 849 100nM	72	23160.4	270.189	12928.6	1045.29	508.01	21765.3	15375.6	22930	10813.3	9779.31	6451.06	162.306	391.896	32591.2	46714	6370.82	26700.8	13962.3	39577.3	7142.69	18935.1	16090.5	7596.08	3522.64	14189.8	7494.01	9340.62	11696.7	14312.9	8451.8
H2030	Vehicle	72	18912.1	195.61	14394	844.796	545.358	21099.6	15898.9	23040.6	15587.1	9917.38	13780.7	27870.2	34544.4	15043.6	33862	859.583	1191.23	23513.1	32048.7	8254.93	16506.3	27310.1	11457.1	1277.21	24343	11763.1	5604.16	9707.49	12604.7	5139.08
H2030	Vistusertib	72	22424.8	121.8	15310.9	802.423	425.106	20752.9	15241.8	27367.5	9541.9	10386.4	6541.26	267.202	424.179	117219	34898.5	945.192	31192.8	1667.23	16333.1	2470.04	15721.7	15573.3	7132.4	3299.45	18525.5	7588.52	9598.02	10344.2	12788.3	9253.11
H2030	Vistusertib + 849 100nM	72	21186.7	188.678	23922.4	961.732	570.256	25398.6	16387.9	23880.1	8975.4	8660.36	6137.79	106.071	166.138	19916.4	36373.6	847.118	34424.1	1086.5	13943.4	2130.85	14808.4	14207.2	7123.5	2671.65	11710.9	5550.71	12637.9	12259.2	12548.9	6221.28
H2122	849 0.1nM	6	27046.5	171.245	10519	948.624	636.593	14651	11697.9	34228	21494.1	40047	14984.8	31282.1	40856	13208.2	22472.6	16408.7	7297.38	39203.1	37451.4	28718.9	22731.8	29746	92083.4	16554.3	13905.7	11842.5	4165.45	3970.98	13460	6373.17
H2122	849 0.3nM	6	28150.3	149.346	10700	976.935	627.373	14571.8	12047.2	31258.6	22727.2	40637.6	13307.2	31313.3	38950.6	9176.4	24236.4	12975.6	5214.26	37844.8	36018.9	26647.5	20385.2	26936.8	91611.5	19980.5	15902	17032.8	4367.22	5063.03	13807.5	1487.53
H2122	849 0.9nM	6	25212.9	114.471	11609.9	849.713	555.894	15978.2	12585	33875.6	21822.9	35305.7	11305.3	28170.7	37805.1	7913.78	20783.8	15273.1	7261.64	38194.6	38067.3	27587.3	22016.7	27757.2	85003.7	14611.7	11274.7	8133.55	4581.46	1333.72	11170.1	2722.65
H2122	849 2.7nM	6	26903.2	95.9637	13613.4	878.203	559.304	15811.7	12583.3	33034.7	22082.2	37987.5	11656.4	25368.1	36138.4	6251.69	21089	16357.6	8006.14	38754.9	38956.5	28433.2	22106.7	29001.8	86720.9	16297.7	11583	9400.47	4721.75	1845.1	9811.77	458.713
H2122	849 24nM	6	24111.6	137.474	12950.7	903.695	611.92	15815.2	12348	23388.5	18036.9	32787.7	7051.65	19324.6	31110.9	1789.07	21929	10278.7	6389.7	35982.9	39648.6	27054.6	21234.1	25848.3	76210.1	13371.9	6408.49	7451.12	4899.36	2977.72	12336.4	3088.09
H2122	849 73nM	6	22459.8	132.144	13943.1	896.233	566.557	16696.7	12472	23160.4	20123.3	31333.7	8765.12	19522	32404	1877.84	23307.1	16953.8	10368.3	38010.3	42201	28859.7	21189.3	28433.2	74641.3	14160.9	6231.62	5245.65	4485.08	4655.2	13512.3	6559.19
H2122	849 8.1nM	6	25095.7	79.5105	12847.8	872.583	576.023	17220.3	13328.5	28589.6	20430.8	34262.2	8895.32	26865.8	38863.5	2583.24	24618.4	15552.3	7411.54	39371.6	40945.6	30185.4	23904.4	28877	86380	15492.2	7281	6303.78	4342.78	2595.2	13040.4	5003.05
H2122	Afat + 849 0.1	6	18343.2	63.2622	16140.9	724.088	589.297	16459.1	13049.9	35429.9	15941.6	27174.9	11013.1	18567.4	31966.6	14429.3	16722.6	12019.8	9182.44	37065.8	41151.4	22176.2	17243.1	25235.6	72766.6	13734.7	12175.3	6240.19	7824.08	4908.92	13516.3	8414.87
H2122	Afat + 849 0.3	6	18353.3	103.906	15675.9	694.729	552.576	15888.7	13182.5	34738.8	18277.9	30651.9	10006.2	18134	28727.6	12245.8	18279.4	13526.3	8285.39	33406.7	37246.5	21962.9	15776.6	24258.2	75005.2	13837.9	11329.3	5834.3	8014.01	4790.16	11788.9	4995.55
H2122	Afat + 849 0.9	6	16473.7	38.156	15891	670.333	540.732	15916.8	12926.8	32058.3	14920.7	28015.2	6510.66	15477.4	30032.9	6389.93	16333.1	9379.28	6389.18	33024.7	40134.9	20892.6	15795.9	20801.9	64421.1	12698	8334.44	5134.82	9800.74	5793.03	12191.8	9317.43
H2122	Afat + 849 2.7	6	17920.2	112.369	15678.1	673.683	550.828	17124.7	12866.3	30182.3	16259.3	31104.6	5826.1	17982.4	30346.9	3183.62	18502.9	8417.75	3915.8	34202.4	39148.3	23054.4	15855	22813.2	70350.8	13022.8	6812.78	5152.67	8374.41	5978.43	13911.2	5529.64
H2122	Afat + 849 24	6	17660.1	95.3016	14610.4	670.056	538.285	15573.4	11339	21368.3	12826.9	24959.6	3446.4	9079.73	24344.2	1322.21	17485.1	6017.63	3757.01	33875.6	44803.9	24718.6	16467.2	17268.6	50818.3	10015.9	4009.87	3168.58	7616.94	5952.14	13537.5	5124.17
H2122	Afat + 849 73	6	18572.2	25.0653	14966	661.84	446.8	17181.1	10707.2	23166.2	16053.3	27448	4934.38	8458.97	23160.4	1503.54	19322.5	10551.9	7911.95	32591.2	41606.5	28150.3	20131.7	20261.6	52318.9	10690.9	3686.67	3753.28	7643.96	5534.36	13593.9	5111.59
H2122	Afat + 849 8.1	6	17248.8	55.0286	15033.9	664.154	476.897	16868.4	11544.9	25085.6	13593.6	26505.6	3920.6	13012.2	29307.9	1739.73	18370.6	8175.63	4881.44	34587.6	43079.4	25085.6	18033.8	20184.8	59582.2	12071.1	4974.9	3577.27	8201.45	6470.12	12186.8	6176.52
H2122	Afatinib	6	20222.6	112.579	14552.3	696.453	443.297	17147.5	10078.5	32403.2	17585	35419.3	8764.03	18868.9	34202.4	9539.26	20640.9	11562.5	7777.94	42417.3	47610.1	29442.7	21505.4	22249	73505.3	13426.7	10175.6	4030.88	4972.21	6453.95	14039.2	5170.86
H2122	Everolimus	6	20203.1	86.6608	14691.1	378.928	471.784	17000.6	12260	40136.8	20062.7	34551.3	4109.54	253.167	454.682	13427.3	20963.4	13256.5	8226.3	17322	44358.1	16398.2	19572.5	24735.9	85858	17766.3	14502.8	6719.39	4361.53	5767.61	12691.3	5982.83
H2122	Everolimus + 849 100nM	6	20958.3	107.158	14350.4	172.149	468.308	16456	12453.7	24839.7	16808.8	33366.7	2545.11	142.069	274.243	1736.32	21805.6	7653.99	5090.43	14087	45524.8	17139.9	19302.8	20387.5	62330.1	11101.7	5449.08	4639.91	4235.1	5973.32	13489	3910.03
H2122	RMC	6	19613.7	54.309	13925.7	773.303	439.216	17124	9865.5	32419.4	17101.6	32096.8	7527.82	18923.7	33813.3	3047.66	18244	19205.5	11388.2	37239	42226.3	28150.3	20296.5	19765.3	56525.6	12219.9	5849.4	3075.77	6805.43	5381.33	14877.9	6986.64
H2122	RMC + 849 0.1	6	19701.5	136.324	13108.1	748.509	488.964	16496.6	10195.5	29747.5	17850.1	35102.9	6465.02	18773	30407.6	2466.26	19295.3	14238.4	8717.57	35070.4	38793.7	25535.1	18075.8	19422.2	58091.1	11872.3	5073.4	3532.37	5741.64	6319.2	13354.5	6137.46
H2122	RMC + 849 0.3	6	21894.9	55.2765	13958.2	796.448	477.3	17923.2	10731.5	32696.1	21249.1	37421.5	10357.9	21838.3	30947.6	2894.53	21699.8	26371.8	17727.6	34064.5	35624.9	28158.7	16966.7	23766	63355.2	17448.8	7064.05	4977.8	9487.94	7032.72	14772.8	5984.83
H2122	RMC + 849 2.7	6	24224.3	76.2385	13933	871.931	579.933	19674.8	12170.3	27587.3	23520.1	44139.6	8358.54	22781	29769.8	1499.18	24224.3	27312.8	14993.6	32234.7	31296.1	27744.7	16491.9	23862.2	62944	21977	5888.62	6235.31	10442.8	7755.29	16966.8	7925.38
H2122	RMC + 849 24	6	26113.3	83.0492	11220.6	946.717	577.146	15188.1	10493.8	19546	18049.7	42835.1	6556.75	15579	30676.4	1464.01	24354	20646.1	13538.1	38630.6	40079	32374	18047.8	22079.2	62044.8	24362.5	6583.55	7364.02	8496.81	5213.96	16082	3461.11
H2122	RMC + 849 73	6	24997	124.277	11297.8	901.799	454.734	15803.8	9590.26	19831.5	21258.5	46175.3	7559.72	15146.1	26375.7	1371.32	24834.8	20093.4	13059.6	34752.7	34262.2	29442.7	15109.1	21589.6	63279.2	23274.5	6168.39	7059.01	7891.69	6916.1	14676.9	3535.84
H2122	RMC + 849 8.1	6	23980.9	164.61	13037	976.146	473.228	17597.6	10389.1	21848.9	19212.2	40538.2	6317.77	16921.3	26391.6	1075.03	21323.8	13669.2	8650.83	34216	34081.6	26825.6	15838.5	19382.1	57937	17952	4947.38	6321.15	8518.65	8192.86	16067.1	6511.49
H2122	RMC+ 849 0.9	6	21848.9	108.489	14773.9	959.681	571.591	21054.7	11017.6	34228	26403.4	41390.2	10891.2	21261.1	26241.9	2231.86	21365.8	28484.4	17501.5	30485.7	30638.1	27452.2	15811.9	23513.1	62007.6	16847.6	5801.46	5087.3	9789.45	8383.43	16357.5	6524.17
H2122	Vehicle	6	22222.9	83.9951	13541.5	765.211	538.011	16177.9	11821.6	35454.8	22460.4	35066.2	14325.1	30795.2	35786	15275.4	22117.6	18331.2	8237.73	38010.3	38373.1	24472.7	18864.4	29734.1	90681.8	17223.5	14956.6	7456.77	4951.8	5204.09	13950	3916.84
H2122	Vistusertib	6	18325.5	85.4602	14721.3	397.04	520.91	15063.9	12977.9	38407.7	18187.7	28427.5	3967.94	256.088	423.035	31357.1	17038.7	518.671	15756.3	2513.23	8208.85	3783.21	16465.7	22597.9	66543.6	13413.3	15254.2	6897.85	7223.26	4945.68	10989.1	4389.89
H2122	Vistusertib + 849 100nM	6	19256	124.287	15455.3	195.488	515.262	15104.9	13616.8	25095.7	14999.9	24004.9	2479.66	122.668	217.397	2677.13	16535.6	120.571	9278.21	2413.19	4194.71	3416.13	16465.1	18870.6	53520	8630.85	5762.32	5211.2	6590.34	5855.99	11684.6	2760.95
H2122	849 0.1nM	24	25463.8	127.368	9356.49	885.381	585.604	12423.2	10498.6	23903.3	17693.2	38392.3	5925.08	20223.9	32696.1	2936.75	22896.4	6952.69	2073.08	40297.5	41347.5	31101.5	20988.4	24441.7	86336.9	17857.6	13156.3	13679.7	4498.42	5132.5	13333.5	7333.46
H2122	849 0.3nM	24	26278.6	123.673	8649.96	895.507	544.803	11239.1	10046.8	21400.2	16708.2	37291.2	5311.23	17497	34496.3	2898.56	24160.7	6137.12	1854.31	44605.5	47335.4	34125.8	21711.8	24934.5	88389.2	16984.2	11991	13167.6	3925.47	6901.06	12865.7	7554.99
H2122	849 0.9nM	24	25596.2	144.908	11508.3	898.126	596.292	16476.3	12479.3	26155.1	19531.7	40134.9	4795.93	18698.1	29734.1	2038.07	24229.2	7403.23	2266.74	36156.5	37167.7	30334.8	21644.5	26444.2	83726.6	15359.9	9294.25	11420.7	4088.7	1771.3	9183.35	856.101
H2122	849 2.7nM	24	25980.8	142.995	11445.6	973.374	559.786	16073.4	12069.6	23634.2	20606.7	40925.4	4260.06	13069	24962.1	1699.71	25894.8	6643.45	1669.98	33968.8	37526.1	29891	20671.9	23430.6	76149.2	13397.4	7972.87	9610.46	4442.79	2002.03	9290.18	4.54e-05
H2122	849 24nM	24	23513.1	105.163	12302.8	912.186	605.865	15533	11732.6	21373.8	17403.4	34909.1	3548.7	3581.04	11801.5	1445.19	26435.1	6774.23	1877.47	30045	42985.1	26518.9	20335	18910.1	51184.7	6461.32	6495.91	8375.01	3470.49	3760.94	11873.9	2933.93
H2122	849 73nM	24	23508.4	123.79	13145	886.694	581.379	16183.7	12932.3	20249.3	19025	35419.3	3759.37	2845.27	10578	1394.09	26796.1	7619.02	2544.56	31104.6	43064.3	26375.7	19506.9	19889.9	47581.5	6787.24	6044.58	6356.48	3698.55	5110.32	13319.9	4079.33
H2122	849 8.1nM	24	25719.7	154.491	13433.7	1102.9	583.235	18885.5	13386	25072	22316.6	42638.1	4059.56	8986.17	19425.1	1450.57	27903.6	8917.68	2336.54	31021.9	37040.5	28305.2	20476.1	23210.4	67629.5	11034	7868.24	6712.61	3571.55	3375.93	12504.1	2285.94
H2122	Afat + 849 0.1	24	20483.8	85.9428	14856	612.359	522.134	16465.2	11875.6	32696.1	19448.1	36519.9	6431.77	13469.2	25722.3	4485.08	21658.5	12354.8	3888.17	39156.1	43497.1	31313.3	19956.5	25337.7	74701.1	13795.1	11080.1	7152.68	4712.58	4658.37	12256.4	3533.8
H2122	Afat + 849 0.3	24	20800	64.0723	14915.1	694.53	532.897	18025.5	12228.1	31966.6	22508.2	39648.6	4779.79	14965.3	25735.1	3028.67	24490.4	11783.8	2596.95	37865.6	40925.4	32534.3	19663.1	24502	82274	14289.8	10009.3	6368	4198.57	4968.11	12464.3	3147.82
H2122	Afat + 849 0.9	24	22274.1	75.4585	17287.2	813.979	555.982	18156.6	12986.7	35077.4	27195.3	49553.1	5181.45	15671	24465.3	2396.91	27601.1	13884.4	3258.84	34376	33691.9	31101.5	18124.6	26241.9	84136.8	16083.1	8026.51	5305.75	5130.12	6413.1	13829.1	5444.33
H2122	Afat + 849 2.7	24	21019.6	52.6037	17962.7	681.011	517.626	17804.2	10630.9	23032.8	19577.8	42856.5	3923.48	6244.14	15974.2	1557.44	24598.7	8150.03	1800.27	33028.1	37745	26656.8	17659.3	21731.4	65525.8	9847.02	6000.73	4740.51	5357.88	5898.86	12295.9	5279.34
H2122	Afat + 849 24	24	19302.6	40.4805	15465	780.833	518.415	18301.2	11299.3	21710.8	15337.2	33523.4	2613.64	2083.92	7675.06	1137.41	25978.2	5838.71	1515.4	28433.2	44391.3	26518.9	18884.3	16016.9	37890.2	4701.33	4046.97	3380.27	4695.57	6503.82	12179.9	5374.63
H2122	Afat + 849 73	24	19191.9	74.5979	15803.9	922.072	458.52	20852.8	11333.4	22812.4	18912.9	37799.5	2843.83	1931.14	6474.48	1182.1	28859.7	7419.19	2335.22	25978.2	37665.9	25591.1	19439.9	18528.3	36901.7	5352.65	3772.66	2948.74	6584.19	7014.05	14058.3	3580.44
H2122	Afat + 849 8.1	24	19960.6	63.536	15942.7	795.938	444.63	20316.2	11638.7	25347.9	18439.5	38225.2	2769.96	3318.9	11311.6	1317.65	27889.7	8593.61	2085.58	32380.5	40856	29149.7	18503.8	18957.7	51901.9	8041.12	4622.85	3897.19	5415.99	6346.07	14108.3	5974.61
H2122	Afatinib	24	20040.9	39.1097	14454.1	686.005	362.669	16689.2	9586.38	27318.3	16220.8	36726.3	3856.24	12743.5	28141.8	2882.76	21057.5	6331.47	1468.04	39935.2	48533	34040.7	21134	20314.7	67239.2	10177.2	7624.29	2907.11	3769.33	6399.78	13243.2	4668.48
H2122	Everolimus	24	21099.4	89.2753	16003.7	402.258	458.803	19001.8	11391.3	37095.4	23047.5	43479.7	3532.55	216.308	359.027	7722.26	25225.5	4260.97	6527.4	17111.6	43696	16417	21028.2	21840.1	68885.4	13085.2	11314.2	5116.72	4612.45	7498.91	14620.8	5606.34
H2122	Everolimus + 849 100nM	24	20203.7	96.6564	15706	195.407	462.099	17370.1	11424.8	22247.8	17871.5	36134.8	2034.66	72.5824	223.52	1706.7	26636.8	1160.31	4537.82	8332.88	44391.3	10270.8	19955.6	13588.8	30947.6	3002.97	4152.74	3835.3	3971.76	7398.35	13932.8	5503.39
H2122	RMC	24	20186.6	135.72	14728.6	946.909	488.389	20848.6	11061.9	27861.8	18973.5	41046	4514.55	11383	23155.8	2231.28	25502	9977.46	2740.13	31928.3	36687.8	22033.5	17799.2	20658.2	53520	9536.91	5945.71	4302.11	6443.49	6279.47	14560.7	4873.96
H2122	RMC + 849 0.1	24	19910.7	117.699	14872.8	972.821	550.662	18875.6	10530.4	26908.6	17747.6	41986.9	3624.09	8277.11	20263.1	1341.99	22811.3	8558.26	2428.39	33249.6	39577.3	23628.3	18584.7	18088	51277.8	7903.39	4153.86	4310.04	5781.41	7415.15	14796.8	4458.09
H2122	RMC + 849 0.3	24	20847.9	88.7216	14379.6	955.276	490.333	21624.2	11649.4	28150.3	23744.7	49272.1	4000.18	8448.75	17011.4	1245.1	25745.4	15291.5	3068.62	28023.5	30494.8	27195.3	15619.7	19336	55837.4	12357.8	5120.52	5498.05	8656.48	8493.63	15185	6263.61
H2122	RMC + 849 2.7	24	24004.9	111.188	13186.7	1098.3	520.397	19569.2	11456.1	23611.9	22158.2	55604.1	3920.97	4278.14	11078	1069.46	28504.3	14909.7	3817.45	26505.6	32813.9	27038.4	16074.9	17333.5	45935.4	11902.5	6188.97	7057.38	7218.33	8942.2	16219.4	6386.36
H2122	RMC + 849 24	24	26241.9	196.262	10825.1	1094.48	514.157	17011.2	11209.4	20829.3	23462.7	56224.7	4858.21	2995.53	9206.7	1290.11	31104.6	18591.4	6530.14	27038.4	34310.2	28855.3	14977.6	17913.2	43066.6	14093.7	6351.54	9943.77	7874.31	7014.96	13870.4	2264.67
H2122	RMC + 849 73	24	23506	180.458	11360.8	1157.71	430.141	17854.4	10702.6	19066.5	23777.9	55604.1	4091.74	2757.19	9932.88	1278.27	35249.3	16516	5037.91	29149.7	35244	29042.4	15627.3	17840.9	44435.7	14021	7807	7372.62	7150.83	7359.22	14868.9	3175.39
H2122	RMC + 849 8.1	24	24533.9	159.39	13696.5	1104.89	527.534	19412.1	12396.1	25121.8	23615.9	49817.1	4875.59	2527.87	9083.33	1290.16	26656.8	14591.9	4545.7	26247.1	35102.9	24465.3	16169.7	15737.6	38196.6	9076.79	5535.11	7279.33	8041.37	9271.06	15741.1	6279.24
H2122	RMC+ 849 0.9	24	20984.6	126.28	14271.4	1030.22	515.851	22471.4	11535.7	27185.8	24111.6	51798.3	4013.1	5793.58	13998.9	1287.56	26636.8	13573	2846.07	26640.8	29882	26503	16004	19331.3	51534.2	10763.4	5534.74	5956.7	7662.78	9492.79	15466.7	5561.56
H2122	Vehicle	24	21433.7	96.3177	13529	762.338	622.481	17739.6	11470.1	30946	21474.5	37257.6	6030	24480	32370.8	3626.76	23272.2	9216.72	2405.92	37613.3	36746.5	27889.7	19118.7	28158.7	87553	14757.9	13277.5	7062.43	3965.34	6248.15	13154	4620.32
H2122	Vistusertib	24	19556.5	102.345	16438.7	336.925	534.132	15780	12894.9	33525.1	16435.2	29450	3879.67	148.099	345.469	11412.9	17111.8	578.929	9917.18	2768.44	9005.66	2682.09	16819.3	17770	54448.6	10190.8	14736.2	4309.65	7564.71	6768.3	11742.7	6194.82
H2122	Vistusertib + 849 100nM	24	20814.2	147.776	16465.4	199.921	529.429	16253.5	13536.5	22698.4	14138.6	25859.9	2148.64	87.2718	227.208	1945.53	18267.6	78.4227	10302.4	1789.12	3750.83	1890.77	16819	14046.1	34954.4	4637.17	5424.45	3712.05	6566.32	6842.68	12363.5	4570.62
H2122	849 0.1nM	72	27452.2	153.11	9952.15	395.104	587.976	13880.5	10961.7	24974.5	19935.9	40207.1	7343.72	10253.2	22707.5	5120.13	29436.8	9265.08	3026.15	37998.9	42856.5	39935.2	21200.1	29001.8	90223.9	18142.4	16499	17674.5	3001.97	8326.05	12614.8	7022.77
H2122	849 0.3nM	72	29001.8	118.167	9411.02	153.73	499.007	13981.8	10834.7	23155.8	18583.7	42211.6	6614.45	9639.38	22020.1	4353.3	28288.2	6780.63	2621.55	37235.3	42618.8	37056.5	18958.8	24354	78120.9	15141.5	14462.5	16159.6	3142.77	8083.85	15230.9	6843.95
H2122	849 0.9nM	72	26109.4	144.777	11250.3	432.767	546.27	14442.9	11883.5	24666.4	18910.7	38332.2	6143.76	8476.49	20896.7	3155.96	25323.9	7053.49	1843.39	38950.6	44779.5	28144.6	20539.1	25694.8	72970.5	12404.7	11708.3	12479.8	3834.68	3919.87	11426.7	2713.36
H2122	849 2.7nM	72	28006.7	186.923	12443.9	242.046	571.679	16020.3	13163.2	26382.3	21510.3	42618.8	6305.08	7730.38	20163.6	3034.82	28441.7	7717.34	2349.52	34064.5	40803	24834.8	18926.4	25341.5	70294.6	11321.7	10262.8	13004.8	3296.21	4664.35	11316.4	787.488
H2122	849 24nM	72	24718.6	181.235	13976	275.1	603.776	18648.8	14087.3	28859.7	24224.3	45040.3	5864.89	4847.96	14652.4	3093.32	33356.7	15470.2	4312.34	18772.8	34544.4	17609.6	17892.3	21437.1	51023.9	7310.24	9900.8	9487.94	3802.98	6317.37	12887.7	5299.27
H2122	849 73nM	72	21354.4	193.733	14734.8	514.867	598.988	19185.8	14300	28739.1	25129.5	44364.7	6093.07	4324.45	11757	3382.94	34030.5	21042.7	9147.35	14179	30960	14518.2	18465.4	20347.7	45031.3	6305.23	9321.68	8758.17	4580.22	9603.45	13309.9	5111.82
H2122	849 8.1nM	72	25591.1	167.549	13699.2	474.447	540.752	17699.8	13180.6	28866.9	24879.5	46223.8	6669.46	6746.96	18542.6	3477.99	32266.9	13301.4	5527.25	27496.1	39466.1	20455	19925.9	23642.5	60584.8	8919.9	9698.55	10083.7	3156.16	5786.92	12272.8	3805.87
H2122	Everolimus	72	24120.1	120.912	15421.3	515.977	475.329	22475.9	11327.6	43486.2	28144.6	50767.5	5499.54	175.427	278.845	18544.6	25466.3	23419.6	27892.5	18587.9	32370.8	14444.1	15725.8	21698.6	74611.5	22652.6	14507.1	7324.83	7056.4	10265.6	15385.8	6868.29
H2122	Everolimus + 849 100nM	72	22814	217.619	14943.6	360.88	523.179	19110.8	12191.6	30644.3	24347.9	47574.4	2900.53	142.34	222.16	4239.68	29001.8	5622.58	38326.4	6170.16	30339.3	5684.63	14861.9	12232.8	31585.4	6059.95	6250.54	6339.82	7003.62	12589	16176.1	10930.9
H2122	Vehicle	72	24102	134.429	13905	206.222	499.109	17883	11904.1	28998.9	21216	36687.8	6722.85	10326.9	21338.9	5690.93	25986	8853	3305.26	35066.9	39735.5	32051.9	19813.7	29016.3	81633.9	11887	13481.2	9105.4	3247.06	7821.91	13849.4	2338.5
H2122	Vistusertib	72	23176.6	149.165	17226	529.138	524.729	16916	11761.1	35961.4	16410	30055.5	4860.96	117.062	271.924	27642.5	15402.2	1171.52	33691.2	2179.07	9058.74	2403.43	16291.6	16401.5	48593.7	10157.3	16063.7	5244.58	8018.67	7700.19	14405.4	8458.37
H2122	Vistusertib + 849 100nM	72	22333.7	273.388	13433.4	246.356	484.836	13279.6	9321.33	21068.9	12789.8	25368.1	2128.37	136.282	166.645	3464	19268.2	423.517	31445.5	1406.2	3977.8	1450.77	15494.2	11757.4	24618.4	3365.57	6227.64	4818.56	5957.94	8851.7	14035.8	9770.08
H358	849 0.1nM	6	17571	240.433	7041.04	890.61	490.774	13789.3	11545.1	14221.4	18783.9	12283.5	51308.5	19536.8	23047.5	10174.9	17462.8	2266.61	4418.79	40945.6	37998.9	25463.8	19995.5	16749.3	27468.6	808.802	17722.3	10621	3956.27	7048.15	11525.3	2439.82
H358	849 0.3nM	6	17975.7	237.257	7393.97	907.554	468.955	16589.8	12330.7	14981.4	22308.5	14200.7	50292.5	24386.8	26119.8	8851.82	20706.4	2506.18	3791.02	38979.8	33712.1	26129	20689.7	18635.1	31257.1	811.591	19596.9	10246.7	3901.26	6705.83	12229	1356.98
H358	849 0.9nM	6	17327.7	343.143	70109.2	945.599	582.182	17467.3	13361.9	15148.7	28449	13101.9	38863.5	24016.9	25489.3	5557.65	17532.3	1904.02	3626.35	36508.9	34546.1	23407.2	17151.8	18389.9	25502	1522.81	17922.7	9029.03	6043.93	6954.62	11754.8	3888.43
H358	849 2.7nM	6	17688.9	261.79	66699.1	870.984	459.84	17909.8	12688.1	14902.3	43667	13591.5	25153.3	18774.8	23749.4	4378.7	19401.9	3253.71	4815.31	35999.1	35904.1	28288.2	19419.1	20603.8	25880.6	1252.53	17746.3	8909.54	4676.06	7517.06	12438.7	2988.85
H358	849 24nM	6	15626.3	314.136	12097.7	826.786	574.365	17746.3	12811.2	12253.1	16784.3	9859.59	20424.9	11778.1	20785.4	1240.46	15340.4	1930.32	4425.26	29438.2	36322.8	24236.4	15472.2	13815.2	16449.2	875.898	10011.7	4854.15	8826.96	7242.9	11051.5	4437.47
H358	849 73nM	6	17403.9	428.704	11810.4	1030.99	697.559	19694.1	12765.8	12007	22071.3	11462.4	19437	15518.1	20641.5	1159.54	19060.1	1945.35	4846.74	32534.3	37235.3	29157	16155.8	16375.2	20968.5	2628.38	10231.1	6570.63	7847.62	8444.65	13318.8	4164.34
H358	849 8.1nM	6	17017.7	382.845	12651.1	998.835	685.544	19961.4	12813.9	13939.8	22586.2	13513.2	27095.2	21630.2	26635.5	1950.33	19813.4	2132.98	4107.91	33691.9	35640.9	29450	19099.6	18511.6	25012	1919.95	19003	7132.03	5548.95	7809.06	11968.6	4506.35
H358	Afat + 849 0.1	6	16800.2	77.8444	11182.3	877.772	413.602	17302	10669.5	16278.1	19329.7	10213.9	11920.8	8672.06	19555.3	1506.96	15950.9	1665.86	3719.38	30662.6	40340.6	26683.5	16094.6	14189.8	19095.3	3108.83	11427.3	7070.85	10016.2	8217.55	13565.7	4276.01
H358	Afat + 849 0.3	6	16958.3	50.7247	11801.8	832.36	353.276	22686.5	10993.2	17678.9	25115.7	11850.9	14929.5	12920.1	20042.4	1725.18	20456	1999.54	4661.35	31733	36134.8	31417.3	17223.8	17562.2	25848.3	3678.71	12900.3	7550.76	8035.87	8354.69	12548.2	3595.57
H358	Afat + 849 0.9	6	17608.1	92.4088	11568.1	884.68	413.937	20517.5	11131.4	15545.3	22095.8	12254	10973.6	12284	22171.8	1340.79	20002.1	1705.27	4497.55	32209	37987.5	33356.7	15803.8	17559.8	23623.6	4735.3	10561.5	7165.24	9241.69	9402.71	13010.9	5007.1
H358	Afat + 849 2.7	6	15994.5	52.3426	12641.4	701.396	404.852	19517.3	11996.4	15164.7	19420.9	10615.2	7843.2	3882.41	12028	1146.56	17167.5	2645.44	6364.49	24111.6	35102	29180.3	12953.8	14701.8	18170.3	3655.53	7646.44	5468.86	13149.1	8565.7	10846	4348.13
H358	Afat + 849 24	6	18080.3	52.2289	12690.1	799.947	392.133	19695.9	10933.2	13209.2	20419.8	10412.2	8099.03	5926.95	13677.5	891.585	18547.6	1660.71	4730.57	24718.6	34546.1	32885.9	14924.7	15040.2	19504.6	4367.76	7450.11	5522.61	12021.4	8607.62	12105.4	4954.25
H358	Afat + 849 73	6	15277	66.4662	13250.6	758.261	504.751	15153.4	10950	14161.5	11482.8	7705.59	6444.35	3499.62	11521.5	866.719	12166.9	1030.03	3214.87	18139.2	33393.4	23558.6	12732	10339.2	11827.3	3907.72	7730.12	4225.21	23236.7	7518.3	9654.41	4332.89
H358	Afat + 849 8.1	6	16573.4	85.6011	12334.2	757.118	423.835	17874.7	11100.6	13809.3	16693.5	9394.23	7997.68	4789.94	14384.8	999.241	16729.5	1692.09	5059.05	24344.2	38778.2	31729.8	14278.4	13584.6	16507.8	4408.89	7601.2	5825.79	12797.9	8341.62	11742.9	4949.94
H358	Afatinib	6	18108.3	40.2736	68485.5	836.593	387.526	19280.7	10261.2	17491.1	22338.9	11231.8	13396	10551.1	20520.4	1995.67	17457.7	2086.83	4654.94	30693.3	38997.4	32558.7	17873.9	14988.4	22626.6	4636.19	13381.7	6186.69	12225	8265.8	12388.8	5057.65
H358	Everolimus	6	16021.8	221.971	12909.3	886.719	482.454	15819.4	13430	22573.7	18262	13279.6	7538.65	151.644	994.441	11651	16626.5	11349.2	13134.3	20244.1	43696	14656	15431.4	16924.2	23389.7	4917.55	24224.3	10707.6	8330.76	7721.78	11075.7	4352.54
H358	Everolimus + 849 100nM	6	17354	449.711	14761.2	901.728	688.504	18705.4	14706	15652.2	19168.1	11562.9	3774.28	85.7743	622.163	1080.54	19054.5	3598.65	6594.94	18187.9	43709.1	17094.7	15300.6	16022.7	17903.9	2467.38	9187.3	5479.25	7718.85	7845.38	11791.4	4394.44
H358	RMC	6	14186.6	279.874	14164.8	734.969	579.346	15252.7	12640.2	16207.7	10619.9	7505.47	12779.4	9672.49	19145.2	1398.15	12239.5	1512.23	4284.79	22209.3	32080.8	17458.8	12350.1	9697.28	12219.3	5145.33	7484.43	3977.55	28268.6	7162.74	9344.2	3906.72
H358	RMC + 849 0.1	6	13789.3	226.7	15007.6	787.095	610.836	16002.5	13131.9	16804.8	10909.1	7417.36	13088.4	9112.13	16875.6	1193.55	11603.5	1549.12	4171.21	19669	28566.8	15961.4	11263.7	9105.71	11485.3	3827.86	7839.66	3082.53	31120.2	7729.01	9014.01	4091.19
H358	RMC + 849 0.3	6	19115.9	418.629	11732.6	923.818	680.651	18399	12149.1	12855.3	18597.4	11105.6	17488.5	16592.4	26772	1474.54	19631.2	2879.53	7157.8	33044.6	36901.7	29738.6	18297.2	13959.6	19512.8	6524.5	11161.6	6465.84	14547.2	7306.51	11254.7	4760.33
H358	RMC + 849 2.7	6	22811.3	387.171	61818.6	924.899	581.866	16610.6	11110.4	10351.1	19595	11558	10146.1	9303.97	20323.1	1094.25	19279.7	2552.75	7198.84	32861.3	40766.3	32900.7	16959.4	13489.4	19084	7094.4	9756.14	6234.82	12826.1	7540.81	12576.3	6062.53
H358	RMC + 849 24	6	25993.8	438.353	9500	1089.47	577.894	15548.4	10972.3	9123.01	17706.9	13069.2	13212	14505.4	22813.6	1063.91	20840.5	1513.67	5262.66	33028.1	39167.9	36709.8	14097.5	11521.9	20418.6	7854.79	8074.37	6668.15	11108.4	6949.67	12539.1	4731.57
H358	RMC + 849 73	6	24974.5	463.083	9330.66	1015.71	561.369	15726.4	11340.1	9168.23	16913.7	12337.8	12664	12492.9	22586.6	1109.04	21938.8	1595.17	5284.88	35077.4	40588.9	39357.8	14599.2	11912	18832.1	6741.86	6788.87	6509.41	9690.13	6852.86	12198.1	5469.72
H358	RMC + 849 8.1	6	21991.3	474.851	9872.51	940.412	596.155	17005.4	11655.3	10771.1	16826.3	11566.2	12925.1	11384.5	22111.5	1046.4	19041.2	1546.3	5111.46	31296.1	38592	33426.7	15009.8	12684.1	18909.1	5857.51	7733.19	5382.36	14123	7266.31	11739.2	5634.57
H358	RMC+ 849 0.9	6	19278.2	381.877	11968.1	991.779	609.349	19546.8	12627.5	12965	19469.9	11402.2	17767.9	15812.8	25463.8	1241.42	20383.5	2575.31	6864.36	32534.3	36134.8	31902.8	18469.5	14943.1	19933	6168.43	10626.3	5486.58	14549.9	7738.75	11186.8	5175.71
H358	Vehicle	6	17182.3	258.073	11521.9	872.633	502.217	20560.5	13306.7	20132.4	25517.3	14693.8	68309.1	24836	22930	15430.7	20600.3	4552.82	6133.99	34544.4	33196.5	25978.2	17370.8	21531.3	31729.8	3870.33	41781.1	11448.1	7543.11	8193.63	12309.3	4147.57
H358	Vistusertib	6	16575	260.74	13558	926.591	570.271	18140.8	14893	26172.1	20845.2	13000.9	9811.9	165.371	914.511	22497.4	18019.3	553.691	11372.7	2559.92	15370.4	4486.6	16032.4	17447.8	24004.9	4671.19	29460.3	10905.3	9098.1	7303.05	12119.6	4310.89
H358	Vistusertib + 849 100nM	6	16936.4	443.247	13959.7	997.527	700.591	18544	14710	15165.2	19271	11296.4	4042.04	73.8037	375.245	1167.23	19504.9	221.968	5091.62	1799.51	6983.08	5465.67	15295.9	14391	17873.1	2265.73	9552.8	5432.05	7647.58	6708.19	11979.2	3875.27
H358	849 0.1nM	24	18010.5	245.463	7637.31	858.396	494.509	14638.3	12762.5	15771.5	19816.3	13760.8	60907.5	19455.9	23286.1	12025.4	20476.6	3631.72	5612.61	39466.1	34909.1	21048.4	18874.7	16927.4	29016.3	323.845	17286.8	11049	3999.51	5560.4	11032.7	121.594
H358	849 0.3nM	24	18920.8	219.114	7525.24	946.261	467.292	16229.9	12808.7	15912.2	22150.3	13945	58209.2	21472.9	26109.4	9630.14	20906.4	3248.42	4552.57	40134.9	36145.7	24344.2	19712.3	18245.6	30878.3	652.3	16428.5	10910.2	3111.47	4281.71	10958.2	815.662
H358	849 0.9nM	24	17111.8	301.485	10728.3	987.154	578.978	20609.9	15599.8	19144.6	25859.9	14970.3	54244.1	22885.8	23749.4	7069.11	20844.6	3315.02	6117.84	32859.6	29438.2	20297.7	17376.6	19030.1	28890	1402.23	15432.7	8770.78	7439.98	7473.25	11461.6	2769.77
H358	849 2.7nM	24	17810.9	305.222	9353.86	935.705	546.355	19643.5	15156	17302	23467.5	14952	33271.2	19703.4	25735.1	4915.75	22830.8	4156.87	6404.42	35244	35683.7	25341.5	19913	17438.3	25349.2	329.001	12088	8390.99	4739.04	6762.35	12110.6	2271.22
H358	849 24nM	24	16083.2	315.013	11917.6	1321.4	583.926	23399	14884.8	14400.6	20994.3	14265.6	20407.2	6159.03	16950.3	3612.82	24587.7	3314.3	6323.69	31902.8	41848	27207.5	17390	14443	18065.4	418.596	10905.5	6503.56	5638.94	6864.68	11389.2	4168.21
H358	849 73nM	24	15363.1	336.667	12318.7	1368.19	608.115	28170	15969.7	14057.6	22563.6	12627.6	12951.5	4072.47	11361.7	2444.33	26375.7	3132.78	5955.65	28023.5	37313.5	27038.4	16038.2	14170.8	18965.2	1254.07	10056.7	6700.93	7995.61	7732.3	11793.5	4198.37
H358	849 8.1nM	24	16189.9	290.737	11618	1242.95	578.541	24631.9	15132.2	15439.5	24105.6	14660	25368.1	12249.6	22247.8	3187.58	24587.7	2550.51	5265.24	32573.3	36942.2	27728.1	16696.2	15938.7	23983.3	1202.91	12383.1	7456.83	6252.33	7498.37	11748.7	4682.09
H358	Afat + 849 0.1	24	16131.3	21.5129	11992.4	812	340.705	23520.1	11356	17145.7	22205	13188.5	15831.1	4612.8	13779.4	2030.45	23983.3	1599.11	4492.75	32885.9	42669.9	35970.3	16477.2	15717.6	20231.6	2270.83	14681.8	7499.66	7821.44	7464.66	10215.2	3122.04
H358	Afat + 849 0.3	24	16432.3	43.7653	12636.4	866.733	348.783	26109.4	12431.7	18065.8	24845.9	13591.2	14291.1	4411.84	12982.2	2030.39	25337.7	1543.74	4537.64	30947.6	40336.5	37799.5	16465.2	17188.9	22033.5	2051.89	14373.9	7070.85	7651.47	7860.03	11798.8	3792.48
H358	Afat + 849 0.9	24	16731.7	38.1524	12797.5	947.771	344.214	29885	12122	16123	24159.9	14017.5	9590.67	2327.74	9696.73	1414.34	25853.5	1204.16	3868.11	27744.7	38778.2	39947.1	15752.6	16816.3	19112.8	2234.62	12751.6	7143.26	8853.22	8787.58	12321.4	4216.77
H358	Afat + 849 2.7	24	15541.8	38.5536	14355.8	987.84	368.338	29149.7	12519	15654.4	20619.9	12382.8	5576.21	567.962	3261.44	1411.63	25095.7	1542.49	4378.05	20933.3	39357.8	37421.5	14937.3	13780.7	14322.6	1492.91	10218.3	5127.85	10214.2	8452.52	11210.2	4052.88
H358	Afat + 849 24	24	16237.4	30.9539	12450.3	1011.85	345.516	29885	11198.5	13872.1	20076	11025.8	4262.08	453.68	2401.48	955.768	26777.4	841.512	3296.12	19931	39737.5	43265.6	15696.6	13790.2	13796.6	2264.21	7800.82	5037.06	9420.35	8221.81	11260.1	4393.04
H358	Afat + 849 73	24	17945.6	34.7426	12951.5	922.834	327.529	26004.2	10021.7	12556.9	18159.7	11137	4476.13	476.295	2461.57	1072.78	26769.3	629.497	3255.67	23042.9	46714	46175.3	19313.9	13307.7	12342.5	2061.65	7061.13	4733.42	9399.02	8520.33	11431.5	4409.63
H358	Afat + 849 8.1	24	16411.9	32.0562	12993.4	950.037	349.682	31761.6	11580	14686.6	21121.5	11140.7	4609.92	635.932	3068.36	1048.92	27185.8	972.152	3570.97	19497.2	36431.8	40167	15269.2	14286.4	15000.8	2247.36	8020.48	4989.25	11165.8	8982.36	11390.3	4979.73
H358	Afatinib	24	16564.9	21.3062	12454.6	797.95	328.477	22517.8	10435.4	17122.5	22078.4	13886.4	11541	6408.95	16006.3	2471.15	25124.5	2226.43	4922.64	34262.2	43260.4	42408.9	20101.2	14664.6	19708.8	3337.29	10604.3	6900.87	9312.7	8781.39	12770.7	5113.57
H358	Everolimus	24	16824.1	113.843	13294.8	906.689	405.621	16486.8	13154.3	26529.5	21530.7	14667.1	6891.47	115.796	463.321	27661.9	20973.1	19702.5	73218.8	26247.1	43761.6	17000.7	20151.5	17282.5	20026.6	4793.21	21413.5	9220.13	10092.8	8151.72	11620.3	4792.35
H358	Everolimus + 849 100nM	24	14793.9	217.566	13887	1361.09	521.653	23995.3	13912.4	17011.4	19057.9	12073.9	3329.62	45.9779	200.64	2087.66	27878.5	2645.51	20420	21082.5	42404.6	14003.5	18445.5	11851.6	13080.6	1308.93	7055.9	3796.11	11159.8	7705.02	11879.8	5523.82
H358	RMC	24	18565.3	250.498	13208.2	1111.54	508.013	23166.2	13233.8	17627.6	20609.6	15229.7	14180.9	8583.53	19792.6	2256.82	24735.9	1724	4956.72	34372.5	42430	36868.5	20396	13807.9	19688.1	4328.22	9431.4	6900.99	10227.7	8155.95	11272.4	4815.07
H358	RMC + 849 0.1	24	17389.2	284.921	13240.6	1250.29	505.252	25745.4	13877.2	18251.5	23047.5	16981.5	11830	9653.94	21110.9	2025.25	28710.3	1438.06	4256.76	33538.5	40588.9	38568.8	21389.5	14591.1	21887.8	3477.29	8844.63	5905.21	9589.82	8176.49	12017.4	4876.07
H358	RMC + 849 0.3	24	18163.1	236.373	11489.4	1133.7	514.421	23541.3	13417.6	14793.9	20712.2	13989.4	15139.3	6399.35	16798.7	3018.51	26915.3	5115.34	11390.7	31258.6	39144.4	37257.6	19933.3	14009.8	20083.3	5004.94	10823.9	6299.34	11752.7	7844.01	10717.2	5067.39
H358	RMC + 849 2.7	24	19703	300.705	10389.8	1334.51	537.07	24105.6	13292.6	11967	18048.2	13082.9	5684.4	1535.91	6934.04	1362.34	28866.9	3759.55	7618.27	29926.9	41848	35710.4	16019.6	11403.5	14516	3894.77	6222.08	4841.64	12776.6	7281.76	11581.9	5454.12
H358	RMC + 849 24	24	22350.9	461.429	12382.8	1297.4	498.229	22312	12868.5	10120	16703.2	11235.4	5667.48	1477.85	6939.58	1066.25	28220.7	2611.03	6802.99	29157	43696	42070.9	14586.5	10230.3	13372	4537.37	6193.75	4629.65	12097.3	6474.67	12417.4	5297.62
H358	RMC + 849 73	24	25072	554.278	10989.2	1740.79	583.79	26214.9	14571.1	12135.8	21094.8	12803.9	6680.32	1547.67	7397.78	1525.38	31120.2	2900.14	7917.61	32591.2	45818.7	47214.1	16566.8	11273.9	13965.1	3944.2	6050.69	4383.05	10924.2	5426.52	12894.6	5519.85
H358	RMC + 849 8.1	24	19686.4	290.092	11746.4	1494.89	579.557	25993.8	14059.8	12667.2	21463.9	12692.4	6542.34	1898.13	8613.29	1240.24	29319.6	3641.87	7949.89	29584.7	41589.9	42635.8	17375.7	12309.5	14492.9	3265.94	6409.95	3763.54	12325.5	7498.84	12493.5	5585.9
H358	RMC+ 849 0.9	24	16518.2	263.17	12058.5	1292.72	539.503	27041.1	14422.5	14975.1	21525.3	14736.2	9125.96	3660.08	12037.2	1949.62	29593.6	4182	7645.9	28433.2	37239	35612.4	19559.6	13319.9	18207.3	3560.3	7281.12	4462.68	12469.6	7789.26	10776.2	5027.81
H358	Vehicle	24	16787.7	307.446	13625.8	957.531	590.07	19733	15609	22187.1	23070.8	14027	64942	20048	21752.9	11629.5	19281.1	3800.41	5507	32051.9	31571.2	19127.5	16316.3	17362	28317.9	3192.45	28114.6	10211	9409.91	7332.69	12028.6	4619.32
H358	Vistusertib	24	17203.7	109.172	13671.7	946.462	440.557	17589.6	14228.5	25466.3	18508.9	11990	7896.13	74.1567	394.549	36519.9	18581.8	1026.65	87300.5	2633.23	17966.2	4033.95	15819.7	18676.3	18753.1	4180.55	26109.4	9987.73	11237.5	7541.99	10968.4	4469.47
H358	Vistusertib + 849 100nM	24	14720.8	279.847	14663	1191.71	615.927	27054.6	14809.9	17962.1	17122.2	10753.6	3699.76	37.8604	177.161	2455.11	23160.4	453.811	34629.1	1473.16	9873.68	3239.52	14898.3	13631.9	14185.4	1842.82	8785.21	4139.13	11834.8	7244.26	10785.5	4885.85
H358	849 0.1nM	72	18987.5	260.504	8381.65	1176.83	460.972	22480.2	12789.1	16723.6	30504	17304.7	32787.7	32728.8	32080.8	3645.43	23040.6	1091.49	2380.74	36258.4	31241.6	36552.8	20857.1	20184.2	33867.1	747.737	18833.4	12250.2	2915.97	5212.46	13365	3480.14
H358	849 0.3nM	72	18686.1	250.376	8338.1	1115.74	456.435	21637	12913.4	16969	28713.2	17756.5	34728.4	30191.4	34372.5	3581.82	25084.4	1093.68	2423.2	40947.7	35796.8	35775.3	22041.7	22543.5	35422.9	530.701	24344.2	13853.3	2369.67	3395.42	14339	3882.77
H358	849 0.9nM	72	18424.7	255.901	10141.8	1086.18	466.419	23995.3	14329.4	15775.3	26119.8	17292.1	24845.9	28905.8	30810.5	1967.82	24105.6	1094.99	2531.44	36189	33390	30504	21454.9	20549.2	31433	534.09	22586.6	10353.3	3865.82	5952.21	12182.5	2557.53
H358	849 2.7nM	72	16782.2	204.672	9228.06	1367.87	443.68	25978.2	15206.9	13949.8	25095.7	17228.7	18169.1	18854.4	28001.1	1764.28	30792.1	934.064	2351.3	35244	35955.9	32210.6	21602.8	18890	30045	89.4655	17726	8808.74	3029.12	4382.96	14079.1	2854.39
H358	849 24nM	72	13013.3	319.92	11493.1	2349.95	606.124	22619.7	15670	13967.7	16493.5	13873.7	12820.2	4376.75	15812.5	1916.13	29007.6	977.428	1747.71	19121.5	37805.1	22093.2	15384.7	12389.8	15716.4	4.54e-05	14238.9	6542.89	7122.46	5369.63	11022.2	4724.84
H358	849 73nM	72	13388.2	470.912	13982.3	2516.94	741.92	30191.4	17616.7	14704	21758.4	16303.4	16070	4447.27	13784.7	2283.59	37987.5	1033.85	2832.91	17976.1	37239	25848.3	15722.5	14359.4	18827.3	745.175	20159.9	6594.89	7642.77	7023.09	12413.5	5103.75
H358	849 8.1nM	72	15654.6	363.916	72266.7	2538.62	628.267	29734.1	17267.2	15610.7	25012	18742.4	16572.6	10624.6	21998.6	1879.25	34424.1	1018.01	2797.56	26825.6	36134.8	27601.1	17994.6	17344.3	24985.2	467.44	16248.5	8682.37	4312.66	6317.35	11997.5	4600.79
H358	Everolimus	72	20075.2	131.263	12092.4	1114.27	408.7	22402.5	12620	21895.7	27861.2	20332.6	9563.98	162.328	463.66	6066.16	28859.7	6614.73	9343.7	34551.3	39371.6	23744.7	23388.5	18165.4	29556.1	7417.44	24847.3	8890.24	8986.24	8754.09	13142	6245.73
H358	Everolimus + 849 100nM	72	14655.8	294.306	12832.2	1968.49	617.852	25095.7	13562	15498.8	17310.8	15639	8822.48	86.1833	318.061	3707.42	47548.5	1521.71	6644.2	16774.1	45574.8	13249.8	19962.4	15180.9	16480.2	2673.98	21875.8	3623.64	16051	6149.31	13641.8	6840.75
H358	Vehicle	72	16924.8	278.214	22163	1044.05	494.866	23995.3	14059.1	20232.1	29756.4	16958.7	38717.4	29891	29438.2	3977.18	20892.5	1406.14	2746.83	38025.5	36901.7	31585.4	18518.3	22526.5	31739.4	2744.27	36501.6	11232.3	5149.11	6413.29	11881.3	3797.58
H358	Vistusertib	72	18090.5	105.88	13402.5	1217.64	371.593	22116.8	13309	22822.4	19282.7	12948.6	6825.29	149.143	533.088	7612.26	23958.8	793.153	14714.4	3057.03	18986.3	6454.06	19963	15220.1	24675.1	5407.19	24272.8	9293.31	10220.7	9506.14	11760.7	6135.06
H358	Vistusertib + 849 100nM	72	13466	169.144	43389.3	1310.76	478.818	19815.2	13077.3	14970.3	8652.48	8199.6	4802.94	18.8492	163.821	2375.11	19754	397.583	10082.3	822.589	4500.81	1900.78	14835.5	9181.36	8438.12	1518	12252.4	2887.13	17030.4	5594.89	10894.8	5600.92
KYSE-410	849 0.1nM	6	28427.5	7381.55	9942.54	21898	8392.09	14972.2	17847.7	27496.1	31977.6	29584.1	15063.1	30381.8	31888.5	9862.61	18300.3	14410.1	7365.13	24854.6	28220.7	10650	22212.3	19071.8	41606.5	11774.9	9760.8	12400	5782.36	3828.39	10072	463.871
KYSE-410	849 0.3nM	6	26636.8	5700.46	9810.12	19738.4	6555.38	12547.6	15999.1	24607.3	28090.8	26529.5	15911.2	23880.1	30182.3	11502.5	16046.4	12013.7	7813.92	23529.5	31333.7	10138.6	21251.4	15938.7	35070.4	9200.38	7824.25	11302.5	4878.95	3154.29	9708.91	813.494
KYSE-410	849 0.9nM	6	28284	6685.18	12404.8	21543.3	7122.85	16712.5	16968.3	29215.3	30154.4	27642.5	14015.6	25301.2	30801.3	8915.88	16253.1	12676.4	8071.16	23513.1	30549.7	10938.9	19305.9	16820.1	35440.6	11515.5	9904.8	12261.7	8541.9	4621.78	12700.1	2528.45
KYSE-410	849 2.7nM	6	26904.5	7132.4	12584.5	23749.4	7859.75	17413.2	17188.6	29989.7	35066.9	28853.9	15640.2	29007.6	29149.7	9331.34	17680.9	15298.6	8899.43	23156.9	26636.8	9997.17	18110.4	18006.9	36697	10606.3	9012.89	8877.93	8247.19	4563.65	12321.4	2706.77
KYSE-410	849 24nM	6	26903.2	11314.3	14049.4	24272.8	10430.7	18650.8	17251.2	22421	28201	27772.4	13188.9	29224	32861.3	4071.68	16325	9485.22	7318.51	23744.7	31001.7	10789.7	18384.5	15389.6	18245	7636.39	8615.85	9392.32	8565.55	5856.53	12238.2	4343.13
KYSE-410	849 73nM	6	28433.2	10278.5	12972	22997.4	11076.8	18950.6	16876.6	21149.1	28296.8	26577.2	13869.6	28900	33204.8	3658.76	17944.7	9539.5	8455.45	22212.4	30644.3	8078.81	18873.3	16133	14581.6	10122.5	9729.96	11713.7	9839.02	6474.91	11702.9	3515.45
KYSE-410	849 8.1nM	6	27038.4	9162.8	14150.4	24489.8	9723.22	20252.6	18030.1	27310.1	32266.9	28333.5	15349.7	30387.9	32215.4	6173.26	18616.9	13154.3	8905.32	24100.8	28282.5	10971.8	18485.2	16971.3	29145.3	11598	11272.2	11067.1	10210.4	6235.94	13207	4515.86
KYSE-410	Afat + 849 0.1	6	28504.3	484.386	9636.99	14816.2	1119.8	22999.6	10249.9	25894.8	32118.3	28552.7	10838.7	18141.7	27601.1	4830.25	18440.6	2483.96	5239.81	22584.4	31307	8960.1	19738.2	18372.3	10613.3	9515.92	10789.7	11185.3	10144.9	7072.92	11562.3	3395.29
KYSE-410	Afat + 849 0.3	6	28002.5	547.802	10664.3	18182.2	1208.34	24467.8	11356	24502	32866.2	33034.7	8969.54	22749.4	27318.3	3524.65	19811.2	2378.49	4383.58	21610.5	29007.6	10245.1	18749.2	18379.9	12132.8	8942.26	9318.85	9377.75	10427.5	6933.01	11906.6	2647.77
KYSE-410	Afat + 849 0.9	6	28424.7	488.847	11435.5	15414.2	1093.79	21946.1	10849	22859.3	28646.7	27066.1	7548.66	19844.5	27065.4	2396.28	18212.8	2047.18	4677.48	20424.8	29786.1	11329.5	19281.9	15914.5	9243.2	10310.1	8613.29	10440.9	13561.2	6807.32	10960.5	4080.1
KYSE-410	Afat + 849 2.7	6	27757.2	493.511	11160.2	18011.3	1121.99	26558.7	11528.7	19172.7	27834.9	30182.3	5656.22	17290.1	24959.6	1810.08	20236.5	1949.19	4514.26	18908.9	30181.7	13287.5	20021.9	16825	7137.74	8124.09	7421.42	9426.39	11270.8	6681.96	12137	4980.46
KYSE-410	Afat + 849 24	6	28433.2	466.847	12731.4	12875.1	973.83	21210	10871.6	16466.7	29685.9	30266.9	5976.02	11444.2	20433	1009.33	16856.7	1493.54	4681.06	15282.8	30516.2	13740.8	16928.5	14118.9	4265.7	8073.47	8391.13	9609.54	14748.5	5198.05	11333.4	5014.73
KYSE-410	Afat + 849 73	6	32210.6	557.88	12446.3	16137.9	1172.13	23009.9	11302.5	16634.3	25746.1	28045.9	5467.28	14239.7	24834.8	1121.04	19159.1	2038.87	5004.69	17266.4	31132.7	14115.2	18348.2	16390.5	4900.68	9867.61	9263.16	10913	17296.2	6161.64	11117.5	3768.08
KYSE-410	Afat + 849 8.1	6	31132.7	581.233	12767.8	14288.4	1133.46	24441.7	11554.4	19280.5	33583.8	35286.3	6382.03	16301.5	24309.2	1101.3	20764.5	1514.64	4842.3	18826.3	27534.5	14099.4	19471.2	18041.3	5794.15	10070.5	9067.95	11501.9	14477.6	5717.51	10902.3	4187.58
KYSE-410	Afatinib	6	30822.9	655.833	12206.9	17331.5	1244.22	23160.4	10867.3	21984	30045	34064.5	7239.59	22011	29450	3410.34	20714.5	2683.22	5332.51	19418.8	31110.9	15419.7	20848.1	17766.8	11944.9	12866.6	10838.7	11029.1	13379.1	5722.45	12137.4	4511.45
KYSE-410	Everolimus	6	27310.1	9039.4	63239.6	33712.1	10050	24588.9	20571.8	38392.3	39389.3	33725.6	4418.55	257.266	1339.47	17535.8	20363.1	25602.6	15648.5	8527.55	27046.5	7704.32	18065	22225.5	31132.7	19410.2	14122.8	11215.7	12401.4	7703.71	13256	5139.72
KYSE-410	Everolimus + 849 100nM	6	27626	14484.7	15253.5	36498	14443	26510.9	22930	32874.4	39203.1	35070.4	3334.98	211.273	1207.01	6395.01	20986	20093.4	14784.9	7704.96	27790.5	8418.63	17527.4	20583.6	15145.4	10656.9	10076.9	8429.93	10217.4	8034.55	13597.6	5048.07
KYSE-410	RMC	6	31296.1	21576.5	14873.3	25911.6	19732.1	20341.6	19445.3	24914.3	25186	28398.3	9281	30516.2	34376	2643.22	19457.9	10112.2	6944.98	23506	29587.7	10411.6	19292	16549.6	11789.4	14459.6	10453	11408.3	16068.6	6352.19	11521.9	4464.9
KYSE-410	RMC + 849 0.1	6	28946.3	22553.1	15654.3	26558.7	20332.7	20958.5	18672.3	23655.7	25235.6	30387.9	8057.18	30346.9	33860.4	2414.22	19217.3	10733.2	7002.54	20837.1	27592.9	10061.9	18604.6	16857.1	10270.2	13313.1	9656.08	10130.1	17076.3	6468.35	11513.1	4800.36
KYSE-410	RMC + 849 0.3	6	33860.4	23053.4	15118.5	30494.8	22708.7	22827.2	19836.3	26969.1	31555.6	33406.7	12433.1	34183.7	34081.6	2607.27	21808	13683	8998.85	22372	28504.3	12408.4	19481.5	18335.3	11655.5	15859.1	11885.5	12007	14334	6293.59	12174.7	5485.48
KYSE-410	RMC + 849 2.7	6	33921.3	27481	14849.6	30960	28288.2	21518	19534.2	19725.8	30722.3	34909.1	10495.6	32855.3	31271.1	1439.89	22022.9	10836.7	6834.99	21139.1	30059.4	11878.9	17685.3	16805.9	9695.56	14882.7	11172.1	12779	13506.9	5793.75	11844.3	6112.17
KYSE-410	RMC + 849 24	6	32547.3	24362.5	13184.9	23274.5	23756.5	17834.8	18344.5	14660	22848.6	27811.3	9354.28	25012	27041.1	1140.41	19406.5	6915.6	5821.88	19029	25089.4	10061.9	11407.8	11929.9	7194.5	13320.7	9833.06	11178.2	14582.5	6483.48	11083.6	7719
KYSE-410	RMC + 849 73	6	30488.7	23582.7	15255.1	21916.9	22665.5	16589.5	16385.5	12702.8	21484.7	27179	9131.77	21568.4	25368.1	1109.09	17244.4	8051.89	6365.25	17585.4	24254.2	8950.86	10566.2	11408.9	6182.86	11897.1	8476.5	10162.4	15447.1	5516.52	12177.7	6991.18
KYSE-410	RMC + 849 8.1	6	28288.2	26772	13870.2	26477.3	26255	20128.9	19811.9	17378.1	30055.5	30200.5	11311.9	27766.8	27452.2	1227.83	19739	11675.7	8274.27	18838.3	24221.9	10613.9	15062.1	15217.5	8049.94	13117.8	9665.6	10146.2	16301.9	5388.94	11226.3	5821.54
KYSE-410	RMC+ 849 0.9	6	31928.3	22818.2	15398.1	27744.7	22472.6	21908.3	18639.5	24246.1	29738.6	31271.1	10868	27337.4	30651.9	2111.73	20351.9	13948.7	8542.64	20794.8	27790.5	11586.6	18835.9	16722.5	9745.01	13645.3	10359.9	10482.8	14114.5	5670.47	12376.3	5016.79
KYSE-410	Vehicle	6	27584.6	8345.7	12545.2	23295.4	8990.12	18301.2	15990.9	27920.4	30946	28427.5	15817.9	24637.9	31258.6	10939.8	17574.4	14432.6	7973.01	24480	30795.2	9879.36	18692	18355.6	33324.4	14385.6	12149.5	12016.9	8713.08	6538.88	11777.9	3271.1
KYSE-410	Vistusertib	6	27920.4	7777.2	14451.7	30334.8	8733.8	21721.3	18573.7	38373.1	30069	25347.9	4927.59	173.999	879.107	33712.1	16635.3	1025.18	10872.1	2372.31	3642.59	1556.26	16575.6	20866.1	25931.1	15374.2	15454.1	10887.4	12191.6	6905.34	13503.3	4116.16
KYSE-410	Vistusertib + 849 100nM	6	25368.1	14306.3	15971.2	31414.1	14793.8	24480	19458.2	33024.7	30791.4	26371.8	3518.08	119.905	663.603	9788.69	17618.8	753.708	9071.24	2462.86	2919.48	1522.48	15817.2	18307	12426.8	7708.45	9611.59	7998.78	11778.3	7641.22	15600	4711.57
KYSE-410	849 0.1nM	24	24016.9	15799.6	10007.2	18872.9	16640.7	13948.8	19457.7	31888.5	29473.6	21759.6	17358.3	30485.1	30639.6	10835	15150.7	15171.1	6742.37	23272.2	23792.2	7492.34	17514	22759.5	34655	8383.19	7263.3	8474.36	6546.66	4828.06	11071.1	907.454
KYSE-410	849 0.3nM	24	26777.4	18969.4	10132.5	18632.9	19425.2	13982.4	20221.5	27722.5	27601.1	22935.7	13852.8	28727.6	32539.2	8116.35	15507.4	11882.2	4887.88	25745.4	26108.1	8104.55	18977.3	23279.1	32866.2	6073.22	7154.56	9024.61	4257.82	4755.29	11632.8	1687.08
KYSE-410	849 0.9nM	24	23861	16279.2	13049.6	19147.4	16756.1	15105.7	19388.2	31585.4	27433.1	21613.1	14340.5	26809.5	28568.2	10297.3	12916.6	14206.8	7932.63	21987.8	22701.8	7478.25	14705.9	20240.5	25694.8	7402.65	7724.49	8915.34	8925.22	5124.77	11200.5	2880
KYSE-410	849 2.7nM	24	27174.9	20954.9	13396.2	22701.8	22329	16894.8	23295.4	32370.8	30339.3	23988.1	14680.8	26648.9	30245.8	10702.2	14808.6	19119.3	8902.44	22707.5	25591.1	8984.58	15458.4	21195.3	25986	7022.1	7867.82	7876.23	7466.61	5394.38	11813.1	3206.83
KYSE-410	849 24nM	24	24258.2	27318.3	15049.3	26769.3	25719.7	20347	24967.1	37235.3	30638.1	24718.6	25417.6	30488.7	30651.9	53854.7	15954.6	15867.1	7688.83	19787.4	23489.5	6521.27	18354.6	26904.5	16984.6	5453.6	17856	10503.9	8435.38	5987.09	12614.2	4321.49
KYSE-410	849 73nM	24	25722.3	24962.1	15193.2	26510.9	23086.1	20661	24588.9	37632.1	29438.2	22359.6	22106.5	25758.3	26720.8	44364.7	15227.8	13515.1	7742.8	19870.4	24004.9	6419.31	15593	22930	14766	6873.99	16221.2	11418.6	10240.4	6817.31	12103.7	4512.03
KYSE-410	849 8.1nM	24	23393.2	31748.9	16374	25611.6	32048.7	21207.5	25848.3	31104.6	30651.9	24711.2	17150.4	31120.2	32547.3	10284.1	16782.6	14872.1	8742.12	22697.3	23529.5	8088.35	17355	21844.9	20979.9	7683.26	9993.22	9377.53	8661.58	6655.79	13034.3	5013.31
KYSE-410	Afat + 849 0.1	24	24467.8	263.343	10949	16327	991.311	29926.9	13316.5	22617.7	26678.1	26017.2	6650.97	8781.69	18855.1	3337.86	18217	2295.21	4529.25	16246.2	27592.9	9974.39	16091.9	18575.1	5553.61	4815.36	8930.08	9477.24	10884.4	6966.93	13817.6	4914.1
KYSE-410	Afat + 849 0.3	24	25382.1	241.098	11152.2	16940.3	1034.3	30639.6	13936.2	23862.2	27735	26503	6841.6	8424	18313	3412.87	19389.9	2879.16	4600.3	14373.3	26904.5	10290.7	16496.5	18996.8	5816.79	4377.4	9600.03	8687.32	11493.2	6926.52	12156	4545.99
KYSE-410	Afat + 849 0.9	24	24004.9	255.114	11306.6	15915.9	930.596	30549.7	13335.3	19828.5	23904	25986	5639.21	5097.87	14750.6	2745.94	19357.3	2451.96	4870.87	14419.4	27642.5	10031.6	17655.5	18040.1	4149.57	5550.21	10032.7	9030.05	13630.9	7104.77	12903.4	5551.51
KYSE-410	Afat + 849 2.7	24	24962.1	242.38	12556	17371.4	1001.92	33204.8	14341.4	22899.8	25398.6	29027.9	5947.28	2337.89	9710.86	1948.39	20239	797.586	4337.63	14600.7	28295.3	9099.73	17681.3	19353	3486.12	4566.79	10851.2	7931.56	11964.9	6973.91	12280.6	4874.86
KYSE-410	Afat + 849 24	24	26004.2	253.674	12980.2	16034.8	970.179	35070.4	14618.8	19645.5	20945	28427.5	4431.55	1004.41	5313.99	1489.98	21080.3	539.503	4564.21	12436.2	30947.6	9301.27	18242.5	17414	2632	4831.44	10970.9	8617.2	11784.3	7136.75	11696.2	5203.42
KYSE-410	Afat + 849 73	24	25592.4	376.278	11218.1	15634.6	1076.39	30055.5	14510	15348.6	18938.2	24502	3639.13	1115.32	5534.67	1533.13	20193.8	1435.86	4956.94	10829.8	31120.2	11737	19401.1	15955.6	2692.43	6312.58	10823.8	9622.17	14434.9	6621.26	12675.2	5614.12
KYSE-410	Afat + 849 8.1	24	23804.3	280.422	12938.9	14185.3	900.253	29756.4	14307.2	19884	19474.8	23777.9	4941.95	1525.15	7252.15	1498.36	18471.7	647.439	4703.92	12881	29395.8	8348.58	16115.6	16077.9	2681.69	6037.44	10600.4	9067.24	16067.9	6176.48	11033.8	5372.15
KYSE-410	Afatinib	24	27222.5	314.738	12030.3	15352.3	1062.76	28144.6	12658.3	24592.6	26140.7	27065.4	8688.48	10672.8	24865.8	4911.7	21751.7	2008.19	5491.99	20055.6	31928.3	10564.9	21057.3	21244.3	7272.17	7676.04	12034.6	9872.78	12022	7071.3	13223.2	6507.67
KYSE-410	Everolimus	24	31572.8	5815.43	14705.9	28184.1	7028.8	17918.5	17708.1	46168.3	27903.6	25853.5	4307.05	158.292	381.224	38929.4	16706.5	31110.9	46688.3	14215.3	38373.1	7543.95	21592.1	23155.8	16418.2	13128	13746.2	10537.8	12016.1	7039.14	12357.4	5015.24
KYSE-410	Everolimus + 849 100nM	24	28453.1	9886.52	14662.3	30822.9	11198.3	19265.5	19735.6	41577.4	27592.9	24587.7	4032	113.992	324.155	28969.7	18968.1	24402.7	41192.7	11068.7	36156.5	6690.88	20827.4	20810.2	9274.24	7786.65	13341.7	8873.97	11411.5	7374.33	12848.7	5335.29
KYSE-410	RMC	24	26113.3	37805.1	15491.2	26951.6	34546.1	19285.9	25218	28855.3	23274.5	23393.2	11226.6	25235.6	32223.5	5498.2	18160.7	11653.5	10366.5	20523.7	28441.7	8676.04	19644.3	20396.1	8664.26	10794.1	11447.2	11751	14159.3	6378.13	12433.2	4954.51
KYSE-410	RMC + 849 0.1	24	27864.6	51031.6	19293.7	29944.8	48791.6	22065.5	29450	32266.9	27322.8	26825.6	13271.5	28612.3	31596.4	6264.55	19129.4	12961.8	10842.8	20181.5	27903.6	9058.88	20937.8	21238.9	8349.45	9684.45	11517	9937.74	12175.3	6595.88	13100.7	4941.34
KYSE-410	RMC + 849 0.3	24	27468.6	46892.5	16824.3	30676.4	48791.6	21388.1	31313.3	30801.3	29646.8	26113.3	14661.8	27612.9	30357.5	5955.09	20851.2	18455.1	15574.7	19625.9	26357.4	8436.85	19256.5	20407.9	8302.91	12557	13137.2	11670	13737.4	5753.58	12394.7	5188.71
KYSE-410	RMC + 849 2.7	24	30032.9	58983.4	16873.7	34629.1	62637.1	22553.8	35143.1	27160.1	30623	31818.7	11010	25812.3	27326.5	3716.36	21940.6	21659.6	16437.3	19341.9	26825.6	9663.66	17194.8	18938.1	5979.86	11459.2	12389.3	12055.5	12540.1	6002.92	12805.3	6356.99
KYSE-410	RMC + 849 24	24	31296.1	60503.1	16693.9	30504	65284.6	20542.9	32441.1	18361.8	22820.7	28504.3	8868.32	18366.7	25592.4	2337.89	21333.8	12913.9	10248.7	17558.8	26155.1	7639.14	12023	14525	3811.49	10437.6	11125.6	11926.4	12859	5870.38	12690.3	6574.31
KYSE-410	RMC + 849 73	24	29614.3	62100.6	16882.8	30792.1	66543.6	20577.1	33786.3	19184.4	23389.7	29001.8	9214.21	18515.2	26247.1	2450.21	22459.8	14602	11842.4	18341.7	27185.8	8296.89	13534.5	14643.9	3767.87	9364.41	11228.9	10852.1	12040.2	5831.4	14156.5	6093.65
KYSE-410	RMC + 849 8.1	24	27481	59886.1	17564.2	31571.2	63896	22701.8	35598.2	22274.1	25337.7	27864.6	8644.43	20432.6	26247.1	2540.53	21239.2	13956.7	9902.11	17205.8	25104.4	7907.05	18067.7	17245.9	4272.95	9037.75	11053.6	10364.7	14787.6	6188.86	13089.7	5757.03
KYSE-410	RMC+ 849 0.9	24	28713.2	56954	19449.3	34718	59877.1	25849.6	38956.5	32051.9	34738.8	30952.2	15662.2	27207.5	28305.2	4791.85	22697.3	20135.5	16537.6	19390	25336.5	8938.41	20209.5	20181.4	6809.87	10906.3	12438.7	9805.41	12909.1	6204.69	12640.2	5157.51
KYSE-410	Vehicle	24	28002.5	20975	15875	24834.8	21050.3	21015.2	22197.9	38563.1	33712.1	25471.4	17685.7	30713.2	30346.9	11082.1	16099	15119.8	6942.96	23389.7	24354	7697.48	16605.7	25089.4	34393.1	12326.6	11550.8	10179.6	8948.78	6630.6	12407.6	3968.38
KYSE-410	Vistusertib	24	28579.6	7304.79	14722.8	27644.5	8628.95	18253.8	18413	41150.5	22533.2	17930.1	4416.78	105.174	328.924	45763.8	16149.7	1511.72	39947.1	2113.46	7491.9	1772.39	16261.9	24502	20714.9	14135.6	15568.6	9913.03	12419.7	7013.93	11979.9	5114.72
KYSE-410	Vistusertib + 849 100nM	24	28141.8	15018	16359.2	33862	16868.1	22071.3	22698.4	39348	23272.2	19177.7	4673.1	84.4011	301.051	34655	17448.4	1350.84	36171	2138.31	5321.18	1509	16788	22792	12570.3	8524.06	15190.4	8627.16	10337.2	7064.07	12694.2	5331.19
KYSE-410	849 0.1nM	72	26769.3	18070.6	10058.6	31414.1	19471.6	19061.9	28317.9	21141.9	29827.8	32215.4	8396.95	19187.3	26505.6	10970.7	22041.7	2451.8	3671.58	25347.9	28710.3	9962.58	21496	23272.2	20162	1927.14	10966.9	12277.6	2994.26	5209.05	11008.3	974.23
KYSE-410	849 0.3nM	72	26278.6	12270.9	9852.69	28998.9	12808	18036.7	27207.5	25853.5	27513.9	28998.9	13282.7	23756.5	27723.9	20071.3	20007.8	3825.57	3668.42	25212.9	28572.5	8100.13	21471.9	23871.7	18770	1165.09	11313.8	10949.3	2731.97	4890.32	11162.4	1631.46
KYSE-410	849 0.9nM	72	26904.5	24496.9	13676.7	36380.9	28224.4	23529.5	36265	24130.9	26904.5	34228	8422.48	17654.5	26247.1	7950.33	22499.5	2487.37	4041.81	23983.3	29587.7	8924.59	17551.7	23506	14488.3	3091.74	9604.29	11680	4088.8	6024.73	12701.9	4310.16
KYSE-410	849 2.7nM	72	25727.4	41366.8	18446.6	45957.7	48344.8	30757.6	50525.6	24203.7	29519.1	39349.4	7267.1	18567.5	22856.4	6782.26	26191.7	2506.04	3660.84	22385.7	25920.6	8924.59	17588.5	23775.8	12552.1	2848.94	8866.43	10830.2	4037.08	6793.52	13656.9	4229.08
KYSE-410	849 24nM	72	25859.9	45152.9	19420.7	54723.6	50818.3	30638.1	48571.9	25993.8	25980.8	40376.9	8423.13	17199.2	27041.1	13138.3	26777.4	3676.04	3632.68	16779.9	29149.7	7404.18	22584.4	18346.7	9326.28	2253.8	14521.2	12053.7	4231.33	7091.51	12524.5	5281.12
KYSE-410	849 73nM	72	28572.5	47858.9	20570.3	57537.9	54764.6	34064.5	53912.2	28006.7	29882	43047.1	9590.76	16616.1	22361.9	16723.1	28710.3	4230.62	4236.65	16285	25337.7	7555.45	19538.9	20631.6	9581.08	4698.95	16376.3	13069.3	6292.12	7851.86	13039.1	4626.45
KYSE-410	849 8.1nM	72	27054.6	34153.1	17472.6	48781.8	40115	28566.8	45706.7	27722.5	23417.7	36534.5	8859.19	16744.1	26119.8	11661.6	25463.8	3156.32	4289.42	18097.8	28002.5	7701.17	22052.5	19624.1	9911.47	3588.67	13174.1	13500.1	4679.75	6843.32	13609.2	5068.38
KYSE-410	Everolimus	72	25719.7	16071.8	16537.1	25095.7	17005.2	16882	19448	27312.8	14862.1	19649.9	3614.55	189.262	409.344	13573.6	16342.2	10548.9	12260.7	9268.82	31445.5	6191.05	16818.6	11974.7	7043.92	10116.6	10281.5	8535.27	24967.1	5657.13	9932.04	4748.17
KYSE-410	Everolimus + 849 100nM	72	18238.5	16100.1	16424.3	23279.1	16810.2	15163.3	16332.9	22563.8	10123.5	13561.7	3578.34	71.9226	287.186	30387.9	13512.4	8264.56	13982.7	3320.06	21579.1	2913.99	11591.8	11066.2	4969.49	6786.46	9340.47	5836.7	37797.6	6259.64	9224.25	5000.47
KYSE-410	Vehicle	72	26558.7	17614	15390.8	35660.5	17808.3	24735.9	29027.9	29489.8	33525.1	32706	11633.6	21846	28006.7	17168.3	21290.4	2894.3	4129.36	24111.6	29584.7	9051.21	19870	24967.1	16635	5254.14	18170.2	12920.6	5928.04	7118.07	12977.4	4127.17
KYSE-410	Vistusertib	72	33356.7	7859.96	16358.8	37049.1	9442.84	19744.3	19673	37451.4	19264.4	17861.8	4856.62	196.613	459.242	41956.2	19460.5	1652.59	33296.1	2017.87	13486.6	2400.23	22698.4	22472.6	15672.8	14868.6	15262.7	9211.21	13690.4	6841.29	11893.8	4686.78
KYSE-410	Vistusertib + 849 100nM	72	12312.9	4372.17	16175.2	9328.71	4646.01	11066.3	14108.3	18168.6	3074.98	3913.93	2546.13	34.1323	107.344	8803.74	3939.33	453.811	6062.41	408.586	1211.99	729.005	6811.86	6007.81	3033.24	4695.4	5448.44	2465.01	60798	5993.99	7226.91	3578.28
MIA PaCa-2	849 0.1nM	6	24344.2	222.105	7950.32	158.495	556.662	11193.5	11381.1	16417	31414.1	26777.4	24258.2	34050.9	42007.9	9150.01	37609.5	337.478	362.146	24354	38950.6	17370.8	13718.7	31572.8	38758.8	8634.42	22201.7	19782.8	3106.58	7740.33	12167.5	6993.46
MIA PaCa-2	849 0.3nM	6	25859.9	206.773	8815.88	213.471	665.402	12241.4	11927.4	17968.3	40741.9	30185.4	23156.9	39939.1	40741.9	9207.52	39735.5	404.87	568.374	22205	31888.5	17964.7	12030	34546.1	41774.9	8944.27	21363.8	18760.5	3145.97	6944.14	13273.2	8617.13
MIA PaCa-2	849 0.9nM	6	23742.3	129.975	9862.7	117.871	497.612	12873.2	12010.3	17903.1	32374	26668.8	18729.4	36519.9	42835.1	5481.68	38194.6	226.296	113.847	25225.5	40360.7	19497.2	15522.4	34544.4	39947.1	5787.92	16171.6	15255.9	2378.54	8574.18	12040.4	2387.21
MIA PaCa-2	849 2.7nM	6	25602.6	227.674	10278.9	235.3	705.633	13599.6	12851.6	19182.1	37573.1	28305.2	26789.4	31169.1	37065.8	6769.75	39018.8	348.292	589.726	23155.8	39156.1	20705.5	14852.4	39934.3	34146.9	5341.58	17012.8	15158.5	2425.1	9274.64	12809.8	3421.13
MIA PaCa-2	849 24nM	6	23628.3	228.913	11406.5	216.141	629.105	15414.2	13159.7	17912.8	35853	25611.6	10770.6	12728	25368.1	1752	39044.1	335.18	542.759	20322.9	39807	23295.4	15551.4	43150.4	15369.7	1582.1	14649.1	13009.2	2231.05	8171.33	14878.6	6065.56
MIA PaCa-2	849 73nM	6	20996.5	274.189	13986.8	289.824	643.717	18734.7	14522.9	19366.3	41791.6	24362.5	9914.73	11512.3	20491.7	1601.48	43265.6	317.305	521.138	20699.8	35077.4	24472.7	16435.7	50523.8	16664.1	1568.08	13202.5	11392	2161.6	11290.1	14920.7	4953.66
MIA PaCa-2	849 8.1nM	6	23862.2	175.531	11430.7	109.575	586.401	15213.9	13845.6	20145.2	37488.9	25623.1	13724.9	22274.7	33712.1	2415.13	40978.4	242.834	229.152	22558.1	40047	21456.3	15932.2	40978.4	20796.4	2393.87	12632.2	11374.7	2007.05	7549.24	14780.1	3201.46
MIA PaCa-2	Vehicle	6	21429	197.35	12995.6	250.116	584.935	16878.2	13408.5	22684.8	36333.8	28453.1	22543.9	43924.8	41151.4	7402.54	39561.5	365.294	135.459	22714.9	35578.8	18053.5	14656.7	39348	50403.2	5593.01	20897.6	12683.7	2417.83	10297.7	14583.9	4791.6
MIA PaCa-2	849 0.1nM	24	19294.8	133.954	12596.2	178.274	496.398	14730	11545.5	19433.9	30245.8	26109.4	7272.18	25920.6	32080.8	1849.37	36501.6	88.1892	1.91528	32861.3	41589.9	17241.5	16969.3	33968.8	58431.6	7196.53	17551	10423.4	1934.56	8725.67	14824.4	4086.87
MIA PaCa-2	849 0.3nM	24	20273.5	222.001	13375	230.071	540.505	17485.1	12406.7	20150.8	30212.5	28433.2	7583.09	21690.9	29080.1	1645.94	37235.3	74.773	51.6688	31148.2	38225.2	15857.4	15869.6	33271.2	57526.4	5792.82	14822.9	9612.7	1802.67	9779.25	15588.5	4848.78
MIA PaCa-2	849 0.9nM	24	18080.3	136.471	13701.2	179.522	527.728	16789.6	12730.2	19634	28001.1	27195.3	5491.64	21765.3	26004.2	1476.03	37998.9	52.036	4.54e-05	29734.1	38568.8	15757.9	17845.5	32390.2	49762.3	6049.14	13346.8	8787.11	2502.99	7620.89	16406.3	4917.37
MIA PaCa-2	849 2.7nM	24	18977	184.773	13292.2	261.502	540.603	16526.3	12324.1	19296.7	27644.5	27174.9	5463.7	9727.1	19560.1	1271.71	37865.6	45.5221	4.54e-05	27864.6	42874.7	17208.4	18625.4	27283.7	38500.5	3330.04	12161.9	7981.26	1908.67	8494.25	15341.2	4462.95
MIA PaCa-2	849 24nM	24	18644	249.846	14132.6	342.756	565.855	16598	12957.8	18834	34104.4	29180.3	5030.53	1468.24	4598.32	1220.13	45547.5	104.281	4.54e-05	18649.4	42753.1	18115.1	16723.1	17818.3	16256.2	316.035	11626.6	5837.12	3322.51	10321.8	15757.1	6973.57
MIA PaCa-2	849 73nM	24	27001.1	245.441	14596	215.519	541.685	17936.2	13010.4	18677.9	34376	31739.4	5089.02	1148	3318.41	1337.09	47581.5	102.466	4.54e-05	18595.1	42404.6	18015.1	19044.7	16228.1	13033.9	551.054	10087.1	5313.75	3740.53	10710.9	16723.1	4622.3
MIA PaCa-2	849 8.1nM	24	18667	187.014	13938.1	333.168	506.032	17465	13099.5	18877.4	33887.5	30334.8	4494.86	4275.99	9863.83	1284.38	45941	93.1246	4.54e-05	21859.5	40996.8	17962.9	18836.1	21499.3	25049.5	2151.79	11994.8	6438.25	2692.78	9520.11	16720.5	5965.15
MIA PaCa-2	Vehicle	24	18791.4	162.839	13807.9	232.192	489.957	16004.5	10439.1	19052.1	30693.3	30266.9	7901.64	26032.8	33712.1	2338.67	34406.9	111.831	4.54e-05	33875.6	42404.6	17081.7	18260.9	31761.6	53520	6397.5	16535.1	7709.28	2361.44	9691.46	16050.7	6251.04
MIA PaCa-2	849 0.1nM	72	20540.3	256.094	14256	190.334	566.507	18061.2	10685.9	16955.7	24713.7	29442.7	4486.64	571.567	1234.23	1697.99	39767.3	19.9826	4.54e-05	15521.3	47631.5	20758.1	16773	17394.8	24711.2	2768.48	10031.7	6957.6	2562.21	10226.5	17164.6	6613.15
MIA PaCa-2	849 0.3nM	72	18324.6	182.521	12142.9	259.356	499.037	17592	9853.14	15588.5	26051	30334.8	4624.85	752.577	1501.5	1267.02	38578.5	28.7129	4.54e-05	14869.2	37987.5	19707.6	14172.4	16277.1	26247.1	5823.83	9786.27	9598.49	3361.91	12102.2	14629.9	3899.52
MIA PaCa-2	849 0.9nM	72	19040.4	191.999	11811.5	285.203	529.973	16085.5	10187.7	15742.6	26924.7	28295.3	4694.57	837.298	1787.03	1421.19	36138.4	24.5122	4.54e-05	12978.3	39947.1	20733.6	14044.6	14520.2	25592.4	4611.24	8671.59	8820.89	3241.3	11842.6	15341.8	5903.98
MIA PaCa-2	849 2.7nM	72	18437.5	212.073	11120.1	264.474	536.204	19272.8	10594.1	18035.5	39183.5	34718	5261.15	1944.9	3818.12	1657.81	41982.7	256.448	4.54e-05	11968.6	30488.7	20004.5	12720.9	18144.6	35440.6	9344.24	12042.8	11261.3	4222.22	14510.6	14328.5	3127.2
MIA PaCa-2	849 24nM	72	18958.6	279.093	8764.81	307.106	465.08	15082.6	10754	18907	42007.9	29587.7	9498.14	3394.69	10401.7	3407.08	44148.4	709.846	430.925	9106.3	29756.4	13128	10851.5	13896.5	26108.1	9111.32	14802	12169.7	4826.44	13664.8	11965	2749.46
MIA PaCa-2	849 73nM	72	20733.5	313.152	8986.69	365.643	555.362	16075.5	13198.3	21196.9	42133.9	29508.9	13904.9	3544.55	12289.6	4909.62	50133.7	926.753	474.997	8587.42	33577	13995.6	12164.4	12474.3	25104.4	7173.11	14905.8	11572.6	4390.95	16051.8	11815.9	2938.47
MIA PaCa-2	849 8.1nM	72	19685.2	251.856	10824.8	396.356	550.236	17231.8	11849.7	20111.1	39959.1	34424.1	6941.77	2972.77	9546.08	2377.34	41589.9	275.721	4.54e-05	12120.9	34216	15852.2	13555.8	15616	28579.6	6858.48	11534.3	11441.1	4335.11	15646.5	14552.6	3763.33
MIA PaCa-2	Vehicle	72	18222.1	144.125	13413.3	214.996	469.07	16290.8	10432.6	17020.9	22831.4	28572.5	4290.68	708.805	1365.7	1497.01	38966.2	20.6999	4.54e-05	15669.3	46651	21048.4	17818.9	18215.5	24354	3838.36	11861.5	7499.96	3163.99	9795.09	15284.2	6064.15

## Sheet: st.dev
Model	Description	Time point (hrs)	EGFR_Total	EGFR_Y1068 (Lower values had high CVs)	EGFR_Y1173	HER2_Total	HER2_Y1248	HER3_Total	HER3_Y1289	c_Raf_S338	Raf_S259	B_Raf_S445	p70S6_Kinase_T412	S6_Ribosomal_Protein_S235_S236	S6_Ribosomal_Protein_S240_S244	ERK_1_2_T202_Y204	ERK_1_2_Total	AKT_S473	AKT_T308	4E_BP1_S65	4E_BP1_T37_T46	4E_BP1_T70	MEK1_S298	MEK_1_2_S217_S221	c_Myc_Total	c_Myc_S62	p90RSK_S380	p90RSK_T359_S363	Caspase_3_Cleaved_D175	MHC_Class_I	HLA_DR	HLA_DR_DP_DQ_DX
H1373	849 0.1nM	6	1994.13	43.4789	493.15	4.71336	66.5259	320.678	505.521	964.833	0	1002.42	488.788	1329.82	721.58	141.036	725.137	3.81039	144.02	172.982	1123.96	82.0295	749.967	847.917	681.718	528.855	28.1838	1846.9	200.501	325.174	1050.54	2166.37
H1373	849 0.3nM	6	1652.71	33.1142	1339.79	35.3579	21.1681	2582.23	1339.06	3495.02	6622.67	1928.69	2537.44	12863.5	324.824	549.373	2258.83	125.741	557.48	1704.9	6340.64	85.7265	101.815	3553.38	5024.75	1816.88	2251.29	968.936	660.455	137.835	6954.69	1436.8
H1373	849 0.9nM	6	1158.19	311.547	636.914	27.8551	219.653	2277.1	2134.55	1005.06	4401.12	2609.23	1616.41	5496.74	1267.26	116.833	1943.8	16.8411	62.0209	448.958	3288.3	473.623	556.307	3221.73	3286.81	966.876	84.7816	1076.35	796.467	356.499	3613.64	6484.49
H1373	849 2.7nM	6	1918.66	356.835	1081.08	2.37561	247.62	3293.45	1837.77	2649.8	5832.76	3154.4	1742.39	4533.28	0	225.702	2227.65	53.9914	40.0601	28.4955	3798.07	80.5633	0	3203.48	3572.25	930.854	1242.82	2321	795.518	314.21	1630.4	1957.88
H1373	849 24nM	6	1203.27	210.956	589.251	25.2455	189.304	1094.24	1019.77	939.7	75.3115	125.121	2050.79	1312.67	2232.37	126.141	204.056	58.4249	193.734	1895.12	1861.92	202.633	1566.94	1750.7	39.052	1045.8	2055.44	568.764	73.8402	273.683	1315.29	3327.51
H1373	849 73nM	6	474.112	43.2246	214.8	11.0218	87.6102	320.985	184.7	498.766	1981.59	688.936	2122.87	1621.02	911.067	36.8346	187.39	29.152	67.4407	818.659	424.705	549.835	800.905	524.213	24.0166	522.03	72.9759	874.793	36.6819	68.1809	3516.87	1118.98
H1373	849 8.1nM	6	1037.55	93.1617	1014.44	26.1773	154.056	2220.91	771.632	2821.52	5792.68	2307.02	4245.01	6728.14	2509.81	346.04	1521.21	123.296	33.8157	897.808	5715.58	538.091	1593.62	3214.18	2572.76	1008.35	8.5555	153.739	953.128	96.4532	3285.39	6462.19
H1373	Vehicle	6	1603.84	80.0024	249.861	36.2778	79.8351	392.249	63.1576	1604.91	2757.03	398.18	5777.68	2099.31	1939.48	1883.25	393.258	44.9522	53.3261	688.569	1754.88	137.437	949.749	1064.39	384.307	109.175	261.31	336.542	29.0036	21.5879	2755.44	529.498
H1373	849 0.1nM	24	721.908	6.56073	138.254	29.1389	21.2585	1246.34	235.01	920.223	1236.66	1200.99	1325.26	1355.46	2983.4	342.314	13.952	59.5788	229.949	1297.2	1682.38	586.79	1084.6	784.163	240.613	258.354	463.852	834.139	61.1071	620.647	2927.52	1300.05
H1373	849 0.3nM	24	250.432	168.609	283.729	2.56271	29.1578	607.778	594.124	219.924	1005.06	680.563	1085.91	2490.34	1901.04	372.369	848.234	10.0468	60.125	358.309	957.778	124.121	921.55	384.307	474.112	60.8308	130.599	167.075	202.173	336.885	347.719	0
H1373	849 0.9nM	24	1684.76	100.876	128.072	1.19852	10.7319	156.536	382.82	858.011	365.565	249.699	411.364	2695.57	362.594	159.802	914.593	50.0372	122.963	1096.8	2232.37	952.246	326.916	1260.65	0	229.142	1587.25	120.332	632.948	13.2483	513.832	3560.56
H1373	849 2.7nM	24	743.893	84.4884	1034.98	2.69562	136.698	873.757	731.47	209.198	585.167	324.227	2016.34	2949.43	2746.17	325.15	151.591	56.0169	11.0831	946.53	493.461	362.285	86.7056	556.628	621.352	338.064	671.288	247.916	326.281	174.363	2510.24	1088.75
H1373	849 24nM	24	0	102.849	668.85	20.6557	21.9068	527.063	380.868	261.551	50.7491	80.4278	844.483	0	0	399.088	425.64	3.58991	21.7459	324.227	1640.58	544.909	216.531	1304.82	262.225	479.149	1020.34	145.108	207.31	103.518	1983.83	1573.13
H1373	849 73nM	24	640.275	24.0314	11.0959	14.4324	9.10863	1555.23	233.401	648.471	1450.07	180.042	3453.85	1332.24	2983.4	326.022	513.832	66.8287	1.25915	451.194	238.241	243.167	489.036	458.274	778.097	80.6064	208.74	371.213	371.264	543.172	591.048	7109.34
H1373	849 8.1nM	24	450.989	5.89489	43.5058	8.72512	35.6457	1248.09	332.775	337.459	1903.89	930.943	949.16	0	2321.94	41.3357	204.943	10.5478	21.8565	1273.3	265.943	51.0272	98.6008	132.871	671.022	350.508	395.431	217.851	140.475	297.126	540.177	7640.69
H1373	Vehicle	24	1408.33	28.6154	227.399	56.5719	7.83096	1651.85	51.8126	2494.04	2956.94	790.066	7859.12	3231.88	2251.56	2640.21	371.469	134.472	42.2847	1865.44	0	240.21	74.4132	2228.11	1336.71	92.7677	894.459	26.256	139.827	407.573	2174.85	0
H1373	849 0.1nM	72	1426.25	42.0195	817.753	32.8834	1.80556	1300.05	134.571	1822.5	1843.42	1859.31	0	766.163	974.473	14.3377	1507.13	121.012	94.0198	96.4552	231.178	1301.81	44.517	178.267	1391.26	193.572	0	712.753	124.762	182.218	425.347	815.44
H1373	849 0.3nM	72	534.559	96.9057	204.332	0.179622	104.346	1188.17	334.355	404.011	446.48	1450.07	2239.38	1510.46	2387.41	1585.71	158.109	7.39069	450.28	801.087	1768.64	494.948	1116.69	175.491	623.242	741.817	667.709	2147.69	541.886	416.619	568.113	276.648
H1373	849 0.9nM	72	782.033	176.083	215.229	26.7828	90.3333	2401.31	275.587	0	1179.43	205.037	194.353	4854.53	1069.15	1539.34	648.471	24.1795	169.359	12.4606	1632.68	195.007	85.9769	1275.81	2075.86	755.775	242.029	110.896	362.003	74.9666	1240.95	1698.7
H1373	849 2.7nM	72	1112.78	244.705	307.488	16.7738	200.01	977.127	757.632	1118.98	4072.08	3388.47	1820.74	2018.63	4183.53	299.134	1212.18	107.42	120.004	1815.52	745.918	296.045	1964.77	1378.43	1350.14	552.258	507.348	574.803	199.492	316.646	3773.11	3903.45
H1373	849 24nM	72	776.36	18.5987	201.352	40.2966	20.2583	183.696	216.735	480.855	1637.33	2234.23	483.637	882.521	3425.18	179.178	1768.64	28.0165	32.601	387.911	197.016	287.032	1871.99	1055.65	267.146	597.802	991.658	1950.13	123.648	212.768	2535.47	3159.36
H1373	849 73nM	72	891.408	79.6613	356.412	94.1042	43.504	792.044	181.344	853.518	1286.1	1464.64	1251.71	2730.55	3649.14	488.26	4305.61	245.532	342.642	517.778	841.02	742.456	809.481	2240.93	3365.21	2641.25	1081.18	296.264	1813.74	222.314	3017.67	222.113
H1373	849 8.1nM	72	0	206.551	343.031	46.0624	121.017	1338.58	716.123	613.871	816.165	603.007	538.789	2719.31	478.854	318.609	376.68	29.4605	131.354	797.764	1903.14	300.694	39.8011	983.712	1313.76	791.177	1015.41	17.0002	948.748	54.0051	1325.26	5789.06
H1373	Vehicle	72	550.813	198.272	253.333	13.8042	111.54	615.169	517.51	2325.41	478.854	0	1393.46	2367	0	1049.68	1299.7	68.5738	274.16	592.245	1570.84	965.962	752.029	518.996	679.203	99.4256	325.034	139.269	356.273	154.13	1769.92	1769.32
H2030	849 0.1nM	6	62.0191	22.1664	1773.53	82.9069	24.9615	190.644	268.121	158.109	430.867	435.739	2343.45	1848.73	334.085	5731.67	0	7.43037	1816.35	318.851	882.521	667.622	124.497	566.846	24.7185	44.1723	252.567	1946.19	87.154	124.284	399.005	258.631
H2030	849 0.3nM	6	419.978	10.9329	471.17	5.67108	29.1571	387.442	301.899	638.309	1693.68	951.066	955.177	186.84	493.685	3909.88	384.307	474.044	969.65	168.189	1653.78	456.558	925.405	30.2311	2435.05	282.568	836.997	2657.47	778.224	983.903	1909.59	1549.43
H2030	849 0.9nM	6	445.04	21.9437	212.738	46.3534	11.5747	550.91	245.44	1556.31	896.279	53.5909	5331.12	63.9665	759.739	3707.57	1405.84	260.986	858.365	650.452	918.538	32.5273	774.121	808.261	365.303	49.1622	448.072	1151.67	767.701	195.31	152.126	45.8035
H2030	849 2.7nM	6	191.762	14.2012	3973.26	35.3818	29.4701	1101.45	404.42	814.67	1145.48	450.358	2594.79	6492.05	3788.08	3254.95	3901.81	941.064	1157.27	1744.02	2061.65	923.585	1556.84	2380.57	1613.26	275.343	2997.25	1024.25	530.031	115.552	226.901	161.05
H2030	849 24nM	6	1653	20.5055	610.532	98.6535	9.50193	2233.12	365.637	1681.11	3072.5	711.474	7722.18	1937.18	2467.64	259.462	3064.59	891.214	606.294	1605.58	1477.29	843.902	1009.67	2314.65	1901.84	171.134	1805.47	910.832	695.695	144.468	1368.75	1066.15
H2030	849 73nM	6	531.899	46.562	296.951	63.2689	22.5685	612.749	322.862	864.412	291.762	20.2176	4310.07	2817.84	1410.99	84.6993	1884.19	95.4413	8.29973	253.206	193.115	78.3928	507.457	360.413	25.6779	213.7	308.834	894.333	632.839	24.7022	1411.85	1313.62
H2030	849 8.1nM	6	584.627	4.32382	14.7202	19.5544	12.8001	124.467	53.9749	777.551	10.1206	205.04	1312.09	2485.33	524.213	41.8122	1248.09	199.056	493.409	602.421	995.059	450.474	109.989	140.92	484.02	468.577	352.97	387.593	478.202	132.39	1296.71	894.528
H2030	Afat + 849 0.1	6	45.7364	10.9831	512.126	37.8625	4.37667	577.077	178.172	161.303	469.191	366.26	712.189	2079.95	822.873	203.023	798.554	84.5281	300.704	507.273	591.048	354.474	103.964	473.033	743.602	20.8063	0	431.241	128.819	131.426	118.953	493.123
H2030	Afat + 849 0.3	6	376.804	5.5204	1234.15	60.6848	24.8122	503.62	387.381	1152.13	251.654	335.301	855.392	313.94	936.332	674.587	856.455	50.9902	107.867	719.388	3017.67	769.21	1388.82	177.453	156.054	70.4588	713.665	192.986	1715.9	396.053	1571.09	844.99
H2030	Afat + 849 0.9	6	739.053	11.9776	1003.97	50.9487	10.0356	279.409	140.107	647.07	823.094	127.026	646.483	391.823	1032.95	121.138	203.195	47.5111	417.034	382.847	198.996	168.101	236.701	267.394	89.9627	360.578	57.7503	540.562	527.286	1008.37	1521.3	366.465
H2030	Afat + 849 2.7	6	263.672	9.54795	109.194	120.737	13.4342	347.511	185.43	243.048	153.729	366.062	795.797	2880.59	474.327	344.348	573.598	7.63253	297.38	981.186	1751.04	574.839	329.219	58.5195	389.813	264.95	912.699	389.813	850.062	1223.97	1536.73	2728.52
H2030	Afat + 849 24	6	924.16	4.08089	530.476	78.5546	11.0499	121.302	96.1746	233.137	33.4782	411.187	513.81	1260.68	476.622	2.17221	0	6.28652	138.047	129.316	1840.82	204.041	603.758	23.0086	361.528	45.6591	209.385	509.176	864.3	373.52	1097.29	1174.29
H2030	Afat + 849 73	6	37.7714	7.44803	39067.4	144.564	19.9713	149.929	34.4198	128.901	882.783	93.5273	803.225	854.382	653.559	183.273	1802.79	136.92	109.074	501.562	2255.8	499.363	230.818	1097.01	13.1857	274.877	1486.09	90.8124	119.493	296.427	2356.64	661.168
H2030	Afat + 849 8.1	6	523.98	5.82614	67012.1	97.8051	8.45241	468.314	460.908	318.651	1208.5	749.659	677.048	3694.12	376.816	30.5718	327.485	30.2608	298.77	191.15	1979.94	147.012	353.927	962.614	354.974	3.28953	35.8435	186.996	1116.3	87.5461	1518.57	602.056
H2030	Afatinib	6	768.438	11.4182	4884.5	33.5946	18.9854	344.486	57.1204	169.573	126.861	44.7691	1860.65	1194.03	847.917	1870.81	380.483	60.4734	308.908	702.134	1602.57	131.713	99.5881	369.982	209.339	493.524	2107.59	191.701	465.94	610.644	1406.14	142.709
H2030	Everolimus	6	615.709	37.6784	87702.9	96.0159	42.2109	3912.18	498.712	1286.1	4169.84	407.742	648.632	82.7881	96.3748	9835.21	1553.03	480.83	193.211	182.218	2468.24	73.3388	571.837	771.662	566.952	1139.71	1557.31	130.118	684.761	1054.67	297.999	1132.63
H2030	Everolimus + 849 100nM	6	598.895	2.23363	233.401	6.19835	22.4514	507.41	744.604	149.313	317.428	350.715	193.418	10.8626	52.5054	100.269	1751.04	77.6708	223.385	820.682	2673.82	254.386	1204.3	196.518	334.907	111.467	965.87	451.301	309.595	12.4812	1771.15	3461.75
H2030	RMC	6	1112.46	5.47764	87.644	15.5786	17.2142	1062.24	115.322	92.6992	477.764	411.518	1941.59	2421.5	534.802	227.838	545.606	76.9774	404.474	337.027	679.889	22.2009	361.009	189	69.5752	72.4872	192.211	522.051	433.823	135.877	1725.25	1336.59
H2030	RMC + 849 0.1	6	713.229	12.7063	852.193	79.0001	27.26	1794.25	26.5192	2321.1	570.891	91.1577	13674.7	6643.63	3589.09	579.636	0	304.374	1712.99	811.854	1618.7	758.056	1260.91	1606.24	83.3829	415.453	524.833	152.69	368.255	420.339	700.877	458.106
H2030	RMC + 849 0.3	6	774.408	27.8396	598.18	64.0495	30.4867	183.495	777.462	888.887	689.335	356.352	2676.44	4696.73	5001.35	4.5368	404.011	569.842	502.739	1079.14	646.71	666.94	1249.23	151.768	206.725	131.102	624.552	617.658	689.399	376.967	309.648	382.535
H2030	RMC + 849 2.7	6	361.91	2.5346	671.802	174.087	28.8577	2234.17	561.012	1209.95	1861.73	1759.09	3596.35	5527.63	0	165.949	2144.84	450.599	265.065	739.565	4815.6	508.697	1920.33	822.527	820.383	730.264	1087.52	1528.69	553.613	1710.45	3048.87	1690.7
H2030	RMC + 849 24	6	1477.29	15.3019	963.148	62.1939	6.57159	2481.56	917.164	1167.45	3045.86	1079.02	2835.62	2388.86	211.301	106.42	996.866	395.995	0	594.054	3267.94	399.958	349.693	836.02	696.109	35.8782	927.668	130.724	1698.75	1542.63	304.502	4768.19
H2030	RMC + 849 73	6	603.007	6.13632	486.892	39.7062	5.24202	69.6414	0	156.844	361.698	1228.59	1264.49	1597.73	200.996	70.0041	226.622	379.358	176.339	859.483	1960.24	147.047	599.907	229.229	139.655	436.308	648.211	631.994	0	683.138	1479.88	1920.67
H2030	RMC + 849 8.1	6	0	37.906	1785.79	83.3529	44.0138	214.304	865.528	244.613	183.406	558.577	1164.58	560.304	1395.95	19.4222	0	343.441	102.217	71.0969	460.078	245.374	127.124	395.941	238.261	1504.09	355.691	1600.19	739.019	279.724	699.417	2202.96
H2030	RMC+ 849 0.9	6	30.1669	13.3448	1031.03	32.4585	27.5868	758.625	83.3495	991.925	800.282	560.765	3039.91	3176.33	882.521	186.901	975.356	665.974	735.736	27.9907	2060.74	529.998	76.6369	1317.33	336.348	568.241	939.794	564.105	1204.48	703.932	2337.26	578.085
H2030	Vehicle	6	668.576	1.41966	602.066	14.4266	18.3634	1085.1	360.742	2295.95	1680.44	742.225	5858.53	2127.25	46.1026	11071.5	2025.89	1315.16	2022.86	1373.76	1005.06	334.272	1650.42	1390.11	545.184	106.571	778.638	504.663	207.11	668.186	53.7358	1842.29
H2030	Vistusertib	6	27.0787	20.8914	904.51	42.98	3.24261	2794.83	711.989	1810.31	1051.28	678.19	45.672	146.388	60.7603	14637.1	412.153	48.0678	702.291	200.391	655.166	26.3751	69.1556	168.129	215.857	570.328	927.787	554.03	617.237	816.084	1134.46	681.955
H2030	Vistusertib + 849 100nM	6	217.078	23.7841	3347.53	7.85415	18.9457	232.818	269.352	457.404	755.323	845.887	227.39	52.3486	59.3239	88.6786	2932.94	11.5473	31.2066	60.665	1224.29	142.084	3023.67	1371.12	219.962	451.636	663.788	613.243	593.84	724.63	1756.45	2614.32
H2030	849 0.1nM	24	493.685	16.5108	461.613	36.3376	55.8242	174.466	543.277	1240.54	1325.65	1416.51	6725.79	2313.87	3674.61	9170.08	1494.25	333.923	1043.65	1238.17	1721.27	495.851	967.435	825.471	30.1707	305.081	157.144	1429.13	142.622	644.904	1106.45	206.336
H2030	849 0.3nM	24	1284.29	67.9891	141.422	97.5195	73.8482	3618.82	476.558	1833.9	1696.38	1468.12	187.389	2977.67	2449.8	3323.96	2987.65	103.589	638.241	2384.17	4169.95	565.93	246.174	3008.52	2111.81	1264.78	119.019	1609.12	966.628	1914.22	289.717	2572.71
H2030	849 0.9nM	24	163.701	36.6832	276.659	8.41673	16.0996	713.777	457.572	2050.99	1873.67	604.057	2829.99	488.788	1366.7	2437.57	0	672.076	9.72869	620.767	1522.28	270.975	1102.27	683.21	100.737	225.326	264.413	1312.05	725.07	1052.93	1176.18	458.362
H2030	849 2.7nM	24	0	0.51567	106.512	37.6648	11.7506	1956.5	10.7357	119.005	461.562	255.99	505.798	1397.07	679.889	1253.36	231.178	6.48016	316.895	1598.13	2020.83	527.623	860.684	1597.53	158.638	532.536	519.955	453.666	477.828	1003.3	611.862	228.863
H2030	849 24nM	24	459.07	122.032	313.328	28.1011	89.5463	0	177.539	164.561	1577.98	406.816	858.011	2603.63	686.7	579.04	503.405	106.939	335.535	884.351	2549.78	200.967	388.307	1343.99	582.436	208.525	455.195	759.748	673.445	1559.02	21.4719	2273.32
H2030	849 73nM	24	251.649	0.542651	66.6249	69.4961	25.4129	483.909	113.555	15.2202	272.802	143.966	1211.22	1386.21	1005.06	285.447	2034.41	290.688	11.8787	658.507	1236.66	205.853	697.231	489.435	67.1067	414.854	375.908	947.639	231.777	210.174	535.85	2942.59
H2030	849 8.1nM	24	329.889	0.553613	74.3943	7.57301	20.3072	180.746	296.458	983.745	840.122	913.229	281.771	1622.39	2278.48	48.8381	1366.7	215.676	234.058	2437.44	1941.59	331.613	451.947	1235.38	845.065	1079.17	1186.35	301.392	173.54	139.591	1691.31	881.732
H2030	Afat + 849 0.1	24	863.943	0	566.59	68.3582	0	225.485	16.3663	0	530.803	148.027	269.023	1185.5	702.48	703.851	442.038	45.8078	131.2	1742.71	866.634	501.522	289.374	128.932	51.6331	216.023	558.627	483.898	624.517	145.869	1232.35	4090.56
H2030	Afat + 849 0.3	24	257.142	13.6778	30.7704	81.6788	26.9344	1034.19	209.935	839.497	70.8355	350.517	724.119	1528.52	169.573	1205.21	469.394	50.7599	80.2746	605.419	1634.95	64.16	25.1975	287.939	158.659	589.918	8.59879	6.85909	77.8986	52.409	1214.77	3012.84
H2030	Afat + 849 0.9	24	2513.34	23.7378	49.1872	38.615	5.74097	4016.82	1486.07	2125.31	4975.42	2742.38	866.516	3262.74	1722.02	372.035	5820.66	460.275	817.618	1498.64	2233.34	486.563	299.183	2751.04	892.654	1857.62	2743.76	2743.12	872.569	1439.51	2354.79	2620.65
H2030	Afat + 849 2.7	24	300.893	30.6807	129.175	58.7848	8.99081	1603.03	155.313	504.074	334.689	1129.59	665.388	183.14	193.976	909.243	929.472	94.6774	116.31	697.048	1935.19	401.672	1002.39	61.5367	89.8604	773.825	503.951	106.707	530.445	1011.91	242.514	3951.96
H2030	Afat + 849 24	24	502.773	15.6001	275.619	40.0138	4.14632	2365.89	384.917	1349.42	1171.55	462.18	1156.31	69.0101	715.771	304.19	797.832	19.9779	4.19958	852.226	1156.09	608.982	332.255	77.873	91.1273	237.196	151.672	540.104	101.194	270.282	194.149	1473.15
H2030	Afat + 849 73	24	302.075	18.9774	609.272	32.5369	25.6207	3223.1	391.16	1253.01	2039.63	686.95	1411.49	1418.89	740.058	380.419	4472.28	167.242	146.668	771.898	1682.38	35.3578	276.64	1762.32	1145.26	469.501	547.173	876.376	276.598	2235.89	3595.12	2132.57
H2030	Afat + 849 8.1	24	301.183	1.25794	3353.88	105.847	16.4276	4275.37	453.035	2264.84	2039.23	761.594	260.071	1624.44	2250.68	181.948	5424.65	187.728	438.191	1555.99	1736.05	531.048	301.207	1767.03	1242.55	765.156	925.599	199.827	1056.18	2672.65	2055.13	599.193
H2030	Afatinib	24	385.255	24.3817	50.5333	37.9863	4.92157	365.565	261.184	1492.14	1100.92	570.81	3537.07	1353.84	1188.17	2340.05	263.272	322.841	803.138	549.069	0	459.311	913.578	2258.21	548.373	555.915	760.274	614.432	864.671	536.855	65.0632	653.012
H2030	Everolimus	24	1810.55	25.8871	632.812	61.4805	17.4542	1395.95	289.434	1522.28	448.276	529.913	62.8488	139.23	2.59368	8845.59	478.854	169.532	405.486	477.67	2673.82	106.77	649.444	1028.02	6.34442	780.544	1410.04	674.163	1573.04	602.026	1945.35	2135.44
H2030	Everolimus + 849 100nM	24	901.002	19.6732	972.747	28.7735	66.7082	2151.16	0	822.873	733.359	1520.26	142.792	44.9103	8.27326	649.748	1440.58	80.9885	536.588	719.464	1422.48	71.8268	553.311	414.159	212.957	144.888	320.794	648.946	474.745	8.37811	210.968	693.647
H2030	RMC	24	294.829	11.513	485.401	72.5773	44.2428	2448.83	639.526	2104.14	1212.47	244.317	6542.59	2495.51	203.016	1726.66	3974.58	3208.57	4127.48	1526.28	0	562.085	777.798	1423.1	1159.12	306.94	798.64	344.379	37.586	581.959	898.577	2534.67
H2030	RMC + 849 0.1	24	127.279	9.1608	491.807	31.4621	21.1954	1915.89	240.74	1130.23	483.29	429.818	831.143	2216.67	1421.37	692.299	707.635	431.731	67.0985	149.199	1632.68	104.318	572.166	422.489	127.959	1023.57	29.2136	714.178	102.848	22.6435	840.195	250.174
H2030	RMC + 849 0.3	24	714.377	22.0355	88226.9	48.2136	8.22146	723.409	143.92	164.561	33831.7	845.485	2592.17	1845.8	927.787	132.945	399.991	917.025	465.735	1547.37	2899.35	380.639	512.546	670.731	100.228	408.441	365.06	1403.92	1254.65	958.48	424.374	1766.69
H2030	RMC + 849 2.7	24	909.416	7.20951	51.1294	15.9596	32.0372	704.721	593.58	535.696	531.623	231.413	1187.22	1699.79	1164.65	70.2625	707.635	1122.03	508.736	1278.42	1809.53	331.575	326.853	237.958	204.544	481.35	403.82	584.23	882.061	1294.67	2041.51	1850.76
H2030	RMC + 849 24	24	0	17.9183	376.564	33.07	2.39906	946.613	109.573	145.706	257.767	582.824	488.544	538.695	207.117	109.961	240.613	258.791	281.059	253.821	653.23	139.171	471.829	425.424	398.18	15.1178	547.923	515.977	398.59	358.296	526.069	519.941
H2030	RMC + 849 73	24	1492.14	36.1966	150.161	41.3868	21.3399	1670.23	564.737	483.873	1052.92	1423.86	1065.37	2419.38	5479.17	510.264	4910.85	1180.46	806.193	3784.58	7355.49	1492.74	5069.26	729.216	1245.52	985.168	1758.7	292.544	1038.04	553.658	1048.62	2645.15
H2030	RMC + 849 8.1	24	3101.32	31.9442	38.3453	151.221	81.3657	1993.29	1612.28	2459.03	3389.15	2235.38	3438.7	2470.26	3495.4	25.2813	5427.15	1890.77	1424.57	1192.88	226.622	968.123	900.216	2811.45	383.997	1405.45	1615.2	2776.71	936.062	318.751	91.6593	47.49
H2030	RMC+ 849 0.9	24	721.542	65.0959	4871.94	1156.37	5.41261	1541.98	109.136	485.026	938.603	1470.82	5344.82	2496.06	5843.85	856.673	5443.24	3041.68	1089.35	7740.2	4960.04	1092.74	1515.06	3804.96	1599.42	26.1835	1212.96	372.09	2595.29	1999.58	417.856	235.601
H2030	Vehicle	24	356.308	50.3299	11802.6	161.47	44.5441	685.948	134.034	556.628	1465.45	23.662	4767.66	3953.62	442.038	7258.87	673.102	611.378	1050.32	602.34	2694.35	160.758	319.832	1977.54	1530.46	513.488	820.233	405.093	817.894	1966.39	1032.98	1485.87
H2030	Vistusertib	24	770.26	53.2502	188.908	97.0994	31.5519	3134.74	650.147	1419.36	2246.54	2022.6	1010.12	81.1176	195.569	27907.2	8096.99	113.675	5935	302.454	2117.2	324.202	3331.72	4078.37	1727.05	1569.99	5480.45	1485.83	1414.52	1698.24	2159.92	589.165
H2030	Vistusertib + 849 100nM	24	474.107	22.1079	7634.15	22.2963	9.93165	507.918	89.1253	179.421	816.845	84.5741	74.0509	42.565	22.1581	346.11	1774.48	0.328488	169.221	111.526	792.919	232.397	1255.45	665.121	459.568	132.674	289.863	1719.46	860.843	1995.12	332.394	3492.01
H2030	849 0.1nM	72	215.451	79.5646	83390.2	27.5669	19.9049	1713.57	1777.53	255.371	4414.09	1235.2	517.686	7454.26	1701.67	3366.08	1667.98	115.762	107.503	972.779	4023.77	148.972	170.382	259.586	1541.69	451.746	338.904	199.987	447.343	528.081	1152.58	1785.12
H2030	849 0.3nM	72	1496.39	2.62546	1089.98	48.6364	1.20528	196.191	832.332	1060.84	1180.97	628.529	783.156	1209.42	247.964	1075.47	226.622	94.4766	778.509	327.485	700.572	103.135	653.559	374.577	666.74	563.036	369.356	1203.9	55.9662	45.2223	2380.48	2886.62
H2030	849 0.9nM	72	56.4939	11.717	38.4605	46.172	40.7606	373.551	67.1896	1137.21	9.07548	136.552	615.474	14.8289	866.634	1592.23	224.367	202.371	183.055	932.034	1188.17	522.905	1362.86	140.919	85.5555	210.595	195.08	193.786	96.7392	974.649	1705.52	235.662
H2030	849 2.7nM	72	1837	12.2076	431.456	18.8877	73.3691	781.614	649.782	106.916	523.931	475.553	172.388	1308.73	1840.82	647.86	2324.48	12.0563	105.271	568.295	1035.67	351.095	1550.61	1654.76	189.009	331.715	811.893	168.075	145.71	872.953	1466.53	717.667
H2030	849 24nM	72	1025.06	37.1099	519.187	95.1792	43.654	514.176	553.053	380.238	1220.6	1057.18	1860.04	83.2926	948.248	1684.26	2868.81	311.191	88.973	1144.56	2680.51	513.064	1199.77	1081.98	400.362	102.945	734.475	2454.53	83.1585	780.775	236.928	411.439
H2030	849 73nM	72	1092.87	18.695	345.062	3.56667	6.79871	2411.81	1294.27	479.094	1268.51	738.88	111.057	3417.12	408.052	1221.16	0	558.956	23.4425	1054.34	2640.99	286.739	305.111	373.066	325.568	368.788	1895.36	179.784	1003.04	39.0418	1275.64	889.816
H2030	849 8.1nM	72	1202.17	26.1798	752.701	19.8638	22.394	159.683	174.466	1048.88	2364.7	1243.95	1274.86	3997.08	1602.57	2298.98	508.489	442.754	201.189	732.914	832.653	106.633	466.474	3453.27	1397.42	312.736	1777.79	357.248	509.345	974.197	2690.96	911.154
H2030	Everolimus	72	1634.9	32.2163	437.942	75.795	1.71521	1433.79	188.223	1507.13	542.382	955.048	1479.41	7.45418	127.339	1757.94	274.016	405.973	951.504	34.1428	493.461	77.0464	378.692	518.226	71.9226	24.395	40.7539	127.693	243.999	535.649	133.967	642.724
H2030	Everolimus + 849 100nM	72	654.987	49.9592	365.637	140.747	1.07757	369.354	184.825	648.471	114.685	96.8082	9.12252	33.8378	96.8173	2762.14	3959.09	982.637	2638.94	1556.67	2516.99	690.853	1351.15	1601.6	1256.46	841.254	1621.91	645.684	211.333	1959.22	2537.02	1084.7
H2030	Vehicle	72	280.818	36.1691	234.093	41.2014	76.4873	119.362	67.4589	162.924	440.811	1258.88	136.419	985.158	0	1412.69	478.854	84.9556	172.075	831.143	226.622	134.246	11.6653	193.115	437.368	500.449	0	631.847	182.256	240.223	454.455	2875.6
H2030	Vistusertib	72	1362.85	11.8665	876.455	18.7225	15.6274	2430.4	861.748	2512.19	943.062	733.818	701.708	284.323	68.9796	9934.43	986.947	217.275	8282.11	145.998	2713.03	453.289	888.881	550.487	534.097	256.378	746.461	300.41	339.272	277.909	433.961	2152.52
H2030	Vistusertib + 849 100nM	72	1063.23	2.40143	9932.87	100.464	108.216	2510.24	1180.95	1350.14	849.168	672.938	182.256	26.7135	19.1065	3613.4	5889.65	49.0909	2674.86	163.785	768.649	243.56	2180.53	1903.03	1158.42	113.314	1338.57	454.785	1115.59	138.692	2075.71	189.134
H2122	849 0.1nM	6	956.024	50.3544	438.717	6.70788	31.9465	476.463	603.564	1935.19	1382.13	4239.67	2070.17	1768.64	4325.32	1342.58	317.791	1298.15	1196.88	3046.21	2117.44	1015.16	2278.65	1261.63	3905.62	994.384	1403.71	502.288	379.434	3053.74	2675.66	9013.03
H2122	849 0.3nM	6	995.059	42.5997	0	40.0551	88.8687	1409.42	229.986	442.038	2980.54	4016.37	865.072	2653.84	550.813	797.105	1199.15	467.836	353.683	2673.82	3052.64	1130.23	331.516	1903.14	3238.29	903.907	1649.96	1982.77	259.249	2344.8	858.627	430.357
H2122	849 0.9nM	6	534.802	15.0121	574.423	98.914	61.5866	1590.43	409.285	1436.8	3564.05	2992.19	519.428	4364.75	1069.15	464.193	1571.02	2227.6	425.941	1619.96	3494.38	585.167	326.918	1961.08	3605.34	960.194	645.418	258.765	597.617	40.5467	1574.45	1573.5
H2122	849 2.7nM	6	0	68.788	2941.64	34.1454	67.8567	55.8932	284.709	1167.71	234.218	268.616	576.725	1792.29	766.572	933.675	104.384	693.792	1741.05	274.016	1101.71	1005.06	515.803	615.169	3678.12	541.536	2101.49	73.122	196.931	62.6131	360.693	78.7532
H2122	849 24nM	6	1022.65	78.883	521.84	175.255	82.8226	1106.21	872.412	0	1681.09	3471.17	59.835	2480.11	1099.71	75.8809	1734.89	747.952	896.168	2034.41	4197.49	1338.58	810.6	0	5384.4	1312.19	624.352	1630.64	422.129	292.203	1184.52	1067.56
H2122	849 73nM	6	984.339	38.6778	1162.04	62.0561	51.6081	1038.28	1179.99	654.987	469.526	3096.82	105.363	3541.85	5020.63	73.0123	1811.03	1197.81	1388.8	1880.64	1193.47	816.165	1497.07	1005.06	3165.84	1339.78	246.698	853.044	348.505	387.973	2385.69	1103.25
H2122	849 8.1nM	6	1064.39	49.2278	971.141	66.5722	90.0533	1665.59	1373.57	1616.41	1155.12	2903.76	496.644	3221.73	4114.4	146.052	1739.32	670.617	1023.91	2226	0	640.275	2749.1	1632.68	6712	755.575	72.0768	1423.03	712.279	106.405	1380.56	2554
H2122	Afat + 849 0.1	6	129.695	2.14677	342.383	71.0547	44.5441	384.031	839.135	1252.38	439.575	384.307	1065.22	2785.98	3159.36	122.436	130.066	1154.12	1831.71	1572.11	290.988	736.868	889.672	1604.91	514.545	718.359	628.196	1288	850.315	519.698	3302.1	2536.92
H2122	Afat + 849 0.3	6	1451.99	38.4649	609.498	6.38613	10.5491	606.542	670.86	1718.77	1123.71	1300.05	1333.29	845.99	1421.37	510.737	193.883	535.472	585.38	2595.83	1316.59	2016.08	880.837	1884.94	2651.29	713.978	1541.35	37.1283	1331.18	274.211	1156.84	850.692
H2122	Afat + 849 0.9	6	1651.34	33.6211	78.6556	47.8332	32.8623	798.762	201.08	1133.18	2207.5	4144.82	735.029	3717.47	424.705	1270.23	2405.05	1479.42	374.766	233.524	0	1417.16	78.1851	1176.11	7272.9	1317.52	676.987	290.314	2320.35	767.842	1093.38	1332.88
H2122	Afat + 849 2.7	6	937.268	29.2986	133.032	37.1378	59.4768	956.11	491.163	213.404	666.649	659.774	386.964	2169.06	1287.13	227.174	1515.99	166.651	279.42	483.666	830.392	1140.66	862.831	1820.91	4970.43	993.561	101.16	1434.77	349.273	586.662	590.02	1524.69
H2122	Afat + 849 24	6	274.719	22.4318	918.871	39.3028	123.738	891.483	32.0768	2202.1	924.34	176.493	63.3577	314.532	344.259	257.336	1161.34	594.745	366.032	1436.8	633.616	873.757	372.586	878.791	3231.88	608.697	31.1883	40.3276	382.24	29.4613	401.992	358.418
H2122	Afat + 849 73	6	761.468	24.9876	179.901	6.55175	41.0139	279.409	280.098	982.556	419.951	388.151	491.154	752.663	654.987	98.8032	191.279	685.955	397.05	2762.14	2646.04	995.059	284.702	887.985	1109.76	868.4	656.044	704.428	2201.11	168.25	1324.4	2555.8
H2122	Afat + 849 8.1	6	12.1901	77.8222	233.856	59.5627	34.3664	477.048	514.133	354.761	998.759	562.222	5.54416	1203.61	1450.07	268.336	90.929	802.274	551.097	2443.68	2435.64	354.761	76.5174	1055.71	1263.86	954.986	746.469	688.783	977.759	952.722	258.509	4276.39
H2122	Afatinib	6	300.278	24.171	72.0297	0.984862	24.1244	351.606	256.531	2060.74	609.164	250.432	1094.03	1585.86	483.666	2369.73	233.518	1370.34	1830.75	1499.37	2691.83	832.653	334.537	314.644	1559.2	37.9737	1469.87	335.941	108.984	637.869	2096.72	714.36
H2122	Everolimus	6	385.698	0.245125	20.7749	143.762	4.33676	72.1335	597.933	567.588	439.748	977.127	489.93	50.5015	167.419	1704.41	1347.99	412.375	1171.03	526.606	627.311	996.571	1161.87	1573.13	3641.58	276.36	707.317	213.774	483.208	366.801	869.811	1461.64
H2122	Everolimus + 849 100nM	6	711.215	18.2479	172.502	36.4848	47.9319	1011.72	413.811	702.48	1885.83	1179.43	192.381	13.6412	102.244	15.9607	1909.5	761.856	567.537	59.7614	2895.23	884.349	109.185	1397.27	1762.73	415.952	288.849	196.797	107.797	388.313	905.436	2692.42
H2122	RMC	6	1952.29	36.8966	875.797	20.2297	61.9083	2089.57	836.112	2519.09	2625.82	2494.04	441.554	4701.03	4054.87	68.9559	2328.62	2827.99	973.185	789.893	2387.41	995.059	1075.88	1033.77	5586.64	1859.18	285.282	295.331	1385.83	148.381	2905.94	1845.51
H2122	RMC + 849 0.1	6	1947.17	21.122	1544.3	160.189	16.5927	3427.81	1394.22	4401.12	3684.35	5438.79	164.556	6527.32	3005.3	188.159	3862.39	3858.15	425.166	743.893	2467.13	2703.35	1544.68	3496.72	11426.9	2835.28	1047.18	945.12	628.034	673.442	1601.47	316.668
H2122	RMC + 849 0.3	6	123.861	40.287	503.265	20.2719	11.4739	671.538	447.58	231.178	360.595	0	21.9672	895.394	437.66	263.665	1410.66	372.932	689.272	2166.37	2014.2	1393.21	95.9821	1511.44	4922.9	801.695	504.07	844.199	904.335	600.987	689.183	532.519
H2122	RMC + 849 2.7	6	513.832	21.7981	118.225	25.2749	120.503	959.551	387.192	585.167	1163.72	936.264	920.155	1866.51	2103.3	102.748	513.832	579.344	1460.77	1822.5	2211.11	1568.66	1107.02	337.459	0	699.188	561.273	620.644	273.189	389.188	119.975	576.71
H2122	RMC + 849 24	6	738.496	78.8369	39.6715	1.33876	46.0667	1276.5	1486.47	207.305	1071.46	908.622	463.243	2010.33	2167.35	61.0598	1032.95	1152.71	440.28	3273.98	4806.26	686.7	1720.22	874.06	3069.79	1377.42	562.603	431.941	522.379	416.169	1226.95	2324.98
H2122	RMC + 849 73	6	1942.36	9.65675	662.686	35.6999	68.5495	89.4037	33.9009	911.169	135.284	1305.86	964.907	32.1326	745.918	14.5446	0	483.036	1492.73	2210.16	2903.76	832.653	213.672	930.943	2236.8	493.685	886.718	1373.87	128.339	1032.91	674.346	1684.24
H2122	RMC + 849 8.1	6	169.573	2.90978	175.147	48.2972	8.36517	136.872	80.8053	880.386	1384.48	0	1168.18	1446.03	1492.14	186.812	1942.39	1591.21	1079.9	1451.24	2648.24	2462.45	1096.68	1287.34	5318.31	1369.62	244.785	709.195	60.2368	69.5184	170.418	803.706
H2122	RMC+ 849 0.9	6	880.386	5.52097	323.825	129.892	147.471	818.633	778.416	1935.19	1865.44	2340.13	1641.82	496.073	556.628	42.6078	287.042	2614.71	2821.65	215.569	0	776.36	145.353	831.143	438.466	726.471	764.894	17.9867	463.616	533.159	2294.17	548.332
H2122	Vehicle	6	1648.46	40.7975	1052.22	51.9042	20.9184	971.774	618.289	2254.81	4791.25	4942.66	2956.77	653.23	1264.97	21.6012	500.43	1075.24	361.033	1880.64	813.948	865.063	213.419	420.499	1923.55	791.352	602.664	289.929	24.5099	360.335	1702.26	49.8509
H2122	Vistusertib	6	259.159	1.20855	208.188	185.881	25.0374	1520.62	18.3521	2442.6	1989.43	603.007	11.2222	99.8409	221.139	3540.1	530.042	161.264	3892.58	789.856	510.466	323.298	186.281	1118.09	3292.43	0	754.735	1500.04	342.084	415.669	1132.48	918.241
H2122	Vistusertib + 849 100nM	6	925.533	12.6335	448.013	0.138221	35.3137	1077.84	211.813	1064.39	1271.26	1526.63	183.937	24.3846	155.947	1.89288	1738.96	79.2655	1592.91	378.954	74.1476	111.098	23.2835	1106.87	5666.02	170.87	459.937	84.7476	386.561	173.888	115.669	1390.72
H2122	849 0.1nM	24	180.042	37.0212	680.854	7.51237	54.1676	711.16	14.8462	3118.02	4431.7	1899.54	872.469	4146.31	231.178	190.911	2391.78	2656.04	540.525	5115.21	8133.35	219.924	1468.06	3102.53	5490.75	3016.06	325.566	357.859	197.151	546.974	150.846	388.732
H2122	849 0.3nM	24	2041.93	17.6917	830.555	77.7877	93.5334	912.931	56.8288	3480.08	3182.26	2897.64	588.42	3696.18	4136.78	180.248	3878.41	563.355	280.825	2206.95	334.716	3612.83	1074.25	5542.82	11839.5	2631.52	1176.68	1319.94	213.624	1529.31	736.491	8862.58
H2122	849 0.9nM	24	723.873	42.6099	414.933	86.2369	18.1279	1349.95	449.933	2216.67	2698.31	0	568.392	1742.71	420.499	112.352	856.455	2131.79	768.528	1788.92	4196.12	428.974	107.134	4650.52	2959.52	1539.7	630.429	1928.91	406.977	495.627	1435.68	196.795
H2122	849 2.7nM	24	551.107	15.1385	436.931	191.469	8.31206	1407.53	1192.88	1002.42	3279.13	5481.84	334.025	3228.67	529.498	140.459	2194.62	1098.89	132.118	3834.95	6599.4	1056.59	219.259	1985.77	3229.79	1540.76	450.773	1435.3	489.088	354.867	1400.46	0
H2122	849 24nM	24	831.143	0.669235	591.327	88.2289	67.9742	1086.48	588.786	1871.68	2987.87	5164.77	130.455	882.235	1050.08	64.3589	2612.68	1585.18	242.27	1274.33	5154.75	1312.09	402.584	1669.26	5778.56	824.71	1038.22	47.3725	49.0772	406.093	579.103	58.0858
H2122	849 73nM	24	498.646	30.6669	743.199	0.626942	43.5355	892.139	566.779	787.321	121.071	250.432	21.2671	377.129	680.189	62.0827	1704.15	570.537	383.582	659.774	1826.5	745.918	179.319	857.665	1345.63	383.744	1071.42	1113.43	505.776	43.3623	847.101	757.121
H2122	849 8.1nM	24	181.868	35.8323	1592.11	242.125	59.2846	2278.01	832.417	3358.34	6107.82	6308.26	668.656	3088.61	2397.63	42.0484	2168.2	3153.91	427.163	3065.99	7286.1	1600.33	144.79	4097.98	5731.67	1152.62	799.79	1138.41	1076.76	617.185	1981.05	146.991
H2122	Afat + 849 0.1	24	810.904	34.5705	378.125	80.3071	31.732	69.8507	646.271	231.178	96.2625	1806.9	27.29	342.836	545.606	348.505	1469.09	1047.08	471.725	1384.1	1844.89	2653.84	705.413	358.309	5277.79	234.092	446.457	222.506	864.825	190.998	424.574	177.339
H2122	Afat + 849 0.3	24	602.943	0.453045	748.494	149.597	45.539	2553.35	769.034	3159.36	4723.65	4197.49	324.213	4085.67	1273.3	117.759	3794.53	1891.61	369.681	3209.18	5481.84	460.078	13.9095	1903.89	8710.18	2433.4	1052.63	1026.67	2.97004	686.349	273.2	1542.67
H2122	Afat + 849 0.9	24	598.436	18.6937	928.572	33.9488	63.1589	6421.43	679.237	1239.92	1537.58	2801.65	300.269	254.85	172.982	99.9684	1365.64	127.634	73.732	729.163	238.241	219.924	832.746	556.628	2379.43	147.845	1338.86	71.2809	550.329	126.964	146.671	465.25
H2122	Afat + 849 2.7	24	1737.01	10.092	1813.23	75.448	96.4309	3576.25	2010.01	7424.27	1590.26	2120.41	409.851	915.081	485.633	88.0552	1043.33	776.819	218.415	700.572	4526.36	1507.13	149.843	169.024	1853.1	598.443	140.011	551.836	661.317	45.8806	104.333	972.504
H2122	Afat + 849 24	24	859.6	23.0362	568.515	45.8008	49.4125	1280.11	1235.95	1717.61	2376.33	0	329.933	8.84135	233.33	5.62983	183.696	1665.44	593.778	1005.06	2509.81	1312.09	347.164	962.105	3744.81	636.321	283.071	97.9857	717.684	156.349	568.219	330.43
H2122	Afat + 849 73	24	597.01	1.58235	111.752	74.2479	1.94534	648.677	56.0968	1482.99	3062.41	534.559	563.343	239.714	521.346	241.536	816.165	2441.15	862.931	183.696	2926.79	0	357.366	1870.32	2346.83	570.436	242.59	683.926	1203.71	183.486	606.193	194.848
H2122	Afat + 849 8.1	24	155.251	16.4793	507.207	7.31647	42.0669	1893.53	567.635	1075.1	1302.79	2700.69	281.56	762.929	743.319	27.0178	1773.69	613.215	117.915	1144.59	4325.32	824.368	562.535	817.457	4764.32	992.507	954.176	27.5577	497.159	121.153	129.683	1315.76
H2122	Afatinib	24	212.566	18.2852	439.419	73.5904	99.012	1496.73	189.787	965.65	229.394	2594.79	381.124	423.439	198.996	480.857	1339.18	214.858	120.28	282.388	0	1203.27	493.106	402.182	4276.2	410.077	371.841	285.274	93.2763	54.3036	411.963	1041
H2122	Everolimus	24	29.8369	6.24449	282.89	183.751	10.0563	644.823	233.569	2620.85	814.67	614.86	252.072	63.7512	52.6155	1406.4	1248.09	793.796	2182.61	108.895	308.953	278.594	460.91	46.3337	1948.11	712.109	1792.52	430.041	413.654	339.247	1517.02	1067.79
H2122	Everolimus + 849 100nM	24	442.837	2.46022	544.075	53.4811	56.712	61.4137	153.489	0	770.622	255.516	37.4047	46.2975	24.4492	97.699	376.68	71.3355	240.541	359.314	2509.81	159.772	648.973	38.4321	437.66	636.445	492.161	10.8471	171.265	52.31	59.117	1204.39
H2122	RMC	24	1440.46	2.59098	197.874	50.1938	10.3594	265.361	359.743	197.016	1072.73	4056.7	1152.42	844.366	0	1531.62	1981.59	183.423	151.054	2255.8	1037.55	1261.3	717.192	2564.32	5666.02	579.59	2579.66	783.516	468.876	79.9209	267.681	502.284
H2122	RMC + 849 0.1	24	140.792	31.4112	504.695	27.5118	101.82	1519.92	89.3526	760.987	75.2909	890.602	768.081	584.79	300.879	54.0744	161.303	1630.02	216.072	2817.94	2516.99	668.219	906.399	76.7351	362.594	714.354	730.504	676.825	432.931	414.003	763.453	1232.27
H2122	RMC + 849 0.3	24	117.938	0.313685	233.849	1.35087	9.01416	351.664	82.3751	995.059	503.658	1045.13	195.094	602.878	396.916	77.4269	1637.33	1543.6	528.968	1584.4	1077.93	1537.58	530.052	1038.61	1579.11	157.281	325.649	748.011	1449.98	144.136	719.14	486.702
H2122	RMC + 849 2.7	24	1526.63	34.196	820.015	98.4977	9.93473	2949.98	639.627	3162.75	2408.15	3536.24	312.967	942.152	1809.22	43.0926	3017.67	4725.9	790.582	562.222	3935.01	191.193	113.657	2540.24	6474.67	1760.96	733.488	1162.44	703.257	107.491	699.383	559.246
H2122	RMC + 849 24	24	556.628	17.3247	871.673	12.3825	5.45331	1141.87	871.017	2322.28	5247.98	5161.13	888.172	825.961	1708.76	56.5408	659.774	7791.4	3228.66	191.193	3873.51	408.052	529.431	2600.12	6371.67	617.67	560.672	2694.43	461.878	243.006	627.49	2314.19
H2122	RMC + 849 73	24	166.199	22.7802	690.442	120.121	9.12404	100.992	332.938	525.729	1847.62	3536.24	286.202	171.457	203.672	41.5709	996.866	3134.2	1640.77	824.368	498.396	2256.69	519.263	1260.5	3765.98	495.616	259.41	78.1987	636.262	691.083	683.159	1748.32
H2122	RMC + 849 8.1	24	2597.35	62.7655	1911.37	184.301	124.895	4968.53	1590.91	4871.92	7817.72	12546.1	1204.51	586.311	1025.47	324.037	1507.13	2789.33	1646.78	927.787	5438.79	172.982	2256.5	1666.1	5651.16	1848.36	687.075	1005.65	1548.32	229.429	178.084	2752.5
H2122	RMC+ 849 0.9	24	978.976	0.267903	100.915	122.097	59.3249	0	326.235	1153.04	1022.65	1098.72	229.728	28.6765	425.58	6.37306	376.68	786.559	345.295	753.415	211.301	187.389	305.532	847.215	0	433.703	191.73	626.434	384.546	322.136	950.885	1167.17
H2122	Vehicle	24	1151.3	24.6526	258.283	66.2203	93.8365	263.409	24.3339	0	1729.19	1843.42	21.3197	1211.22	228.9	176.879	164.561	657.684	446.537	797.832	3114.31	1773.69	783.874	1393.21	0	948.965	966.169	94.8814	422.589	79.5222	576.497	137.196
H2122	Vistusertib	24	304.219	7.5196	650.765	272.392	49.4066	33.4774	1310.74	474.112	441.563	1249.07	19.2032	57.6427	147.672	24.2125	157.29	15.554	98.1731	428.938	1079.95	197.061	939.065	577.894	385.015	317.017	229.235	213.229	534.457	28.7133	904.168	2802.3
H2122	Vistusertib + 849 100nM	24	823.982	20.2083	139.713	12.15	29.9331	769.743	325.403	320.985	1457.04	1096.8	41.019	4.00978	28.2035	66.0211	1084.4	19.7503	517.003	318.374	114.029	157.58	546.979	278.079	2962.44	399.542	141.902	768.753	616.624	285.389	61.1958	2102.32
H2122	849 0.1nM	72	776.36	48.4281	464.289	61.769	109.128	755.388	279.004	1235.67	2278.7	3407.59	993.967	1423.67	963.115	213.546	0	52.4071	273.522	1343.16	2120.41	282.388	1168.68	615.169	1275.95	102.633	1665.47	1311.07	29.7174	200.149	846.768	689.143
H2122	849 0.3nM	72	615.169	63.9229	219.582	15.9507	10.9376	108.749	490.15	0	236.521	1790.36	46.7719	476.935	638.309	120.035	800.023	493.409	24.098	263.272	602.714	1047.98	187.679	1032.95	4968.24	1709.42	511.221	2447.29	270.783	650.938	280.002	3345.52
H2122	849 0.9nM	72	369.239	29.7824	763.109	255.439	11.5872	1924.47	478.837	2784.74	4281.96	4865.77	883.174	2624.07	2226.98	285.256	3392.07	806.222	108.126	550.813	5998.12	597.007	377.585	3261.6	7725.24	2043.2	1181.89	1549.12	222.22	621.031	331.233	2414.2
H2122	849 2.7nM	72	792.044	41.0362	958.161	5.47642	10.1055	792.637	353.654	1118.98	729.949	602.714	578.773	758.586	470.466	122.285	1407.21	1001.26	146.105	2166.37	3170.53	0	669.012	716.67	2981.42	496.188	572.993	220.681	34.9595	732.466	64.0179	887.667
H2122	849 24nM	72	873.757	31.8722	276.692	66.0756	32.0052	1199.17	159.375	816.165	513.832	1592.09	488.792	171.363	859.457	8.7486	235.871	404.697	526.213	968.601	0	498.008	404.818	833.502	721.58	82.7031	1575.51	904.335	538.7	410.675	145.803	654.083
H2122	849 73nM	72	151	8.49062	635.364	228.649	32.5972	1166	101.117	1827.71	2129.75	1254.66	1206.99	55.0387	332.492	7.17692	240.613	2020.5	1748.57	2680.87	1313.11	369.537	456.946	1423.25	955.177	809.21	184.547	1485.32	16.1939	373.388	432.859	490.828
H2122	849 8.1nM	72	0	36.8984	1093.45	214.019	58.7689	1699.51	46.6015	1224.36	2108.56	3265.8	968.081	984.047	668.541	287.413	2734.66	892.857	339.812	2330.32	4455.57	1575.01	662.095	1336.71	5134.62	113.527	294.846	263.793	66.9467	1114.24	295.034	1617.05
H2122	Everolimus	72	1363.71	5.72619	54.5236	125.702	2.68898	635.63	504.449	1229.81	597.007	358.986	225.484	5.20917	31.2847	3943.12	540.177	2001.34	7024.56	604.493	228.9	183.835	244.62	92.0526	1055.1	1040.8	574.298	72.5106	194.569	152.43	435.118	179.673
H2122	Everolimus + 849 100nM	72	1144.89	31.4353	1171.71	16.8358	31.7955	108.111	60.345	866.634	688.569	672.764	147.608	4.2267	32.5576	401.119	615.169	973.136	10437.3	270.418	858.011	52.2566	220.679	907.411	1339.66	462.334	674.913	129.997	1182.88	222.529	548.932	2730.42
H2122	Vehicle	72	340.85	20.8284	58.9989	38.8477	36.3191	366.676	277.751	205.037	135.014	1037.55	1018.14	802.436	724.119	1343.43	918.538	687.912	1308.03	247.964	0	679.889	448.288	1435.66	0	336.17	190.651	733.196	16.072	409.104	19.5846	2857.44
H2122	Vistusertib	72	2697.96	15.0573	1605.51	304.87	31.149	143.537	174.637	1017	1517.91	1699.29	892.055	34.501	106.015	2537.44	500.892	299.051	4748.85	557.733	1888.57	457.761	1219.97	823.087	3433.25	1495.66	919.562	987.965	85.0458	10.8889	1666.8	1757.56
H2122	Vistusertib + 849 100nM	72	836.788	38.1517	28.499	8.18595	51.3284	1181.59	145.002	312.845	768.257	1792.29	45.1465	9.53242	20.6857	93.067	1592.28	65.915	1999.81	71.5612	613.537	54.3578	460.084	639.841	1739.32	247.278	198.129	844.047	261.113	337.908	535.808	2839.81
H358	849 0.1nM	6	74.5536	28.1573	318.533	35.8865	48.8502	701.738	97.963	50.2717	597.599	86.8505	2538.6	1972.13	814.67	697.335	1270.72	177.721	96.8538	0	1343.16	180.042	650.272	355.277	1553.03	346.245	313.268	202.766	257.189	64.7861	830.543	199.901
H358	849 0.3nM	6	597.294	5.70349	303.161	28.8734	2.32119	773.95	462.011	243.647	1198.29	200.827	2488.33	2066.81	1107.83	862.396	585.588	19.4927	329.306	2203.85	1667.98	1477.29	819.053	1053.59	0	200.502	443.397	297.027	393.811	1211.96	198.883	837.048
H358	849 0.9nM	6	269.548	53.6456	85566.4	176.817	122.984	321.114	340.095	396.287	8134.11	83.3776	4114.4	1866.2	1621.02	420.095	1485.88	102.273	322.666	1290.52	488.55	1323.41	1477.8	273.064	1981.59	146.218	646.205	625.183	639.859	177.013	99.7424	214.355
H358	849 2.7nM	6	487.753	37.083	81380.3	70.1341	17.879	1189.55	520.226	1252.48	31825.7	941.086	5643.47	1974.45	839.497	934.065	438.973	752.423	887.026	2543.41	4305.61	800.023	137.303	3609.08	1828.52	76.1212	740.151	346.408	386.415	568.204	984.061	276.465
H358	849 24nM	6	452.968	11.3261	1578.07	11.1076	18.679	740.151	217.404	787.908	1894.88	682.692	924.014	16.6556	88.1782	67.5062	477.199	226.061	81.3529	416.315	1027.25	1199.15	535.975	126.988	186.095	61.8837	1341.03	619.577	143.549	240.666	632.638	257.152
H358	849 73nM	6	738.157	88.4865	1233.73	108.423	155.544	334.192	135.403	373.506	249.699	413.269	810.664	855.455	1341.86	38.5289	1400.4	505.893	1180.76	460.078	263.272	1236.66	182.775	150.53	1496.25	485.999	2055.08	250.834	338.39	286.562	555.492	147.201
H358	849 8.1nM	6	96.2705	90.3764	1871.72	127.49	162.304	296.399	434.839	49.2857	1802.79	554.046	2487.2	3154.78	0	62.0487	420.283	615.644	716.703	238.241	2518.08	1249.07	783.09	1503.65	2295.95	193.808	3355.14	524.012	211.828	612.296	152.336	426.349
H358	Afat + 849 0.1	6	403.869	36.1989	205.572	145.192	83.9378	831.615	256.483	287.74	2832.78	50.5558	1846.99	1579.39	55.3199	56.4627	1677.46	81.2458	131.473	1733.61	855.681	2261.45	500.674	792.247	2155.79	4.39622	629.946	738.633	1088.56	377.559	977.57	142.083
H358	Afat + 849 0.3	6	131.911	30.94	50.0669	27.0693	24.9596	2688.68	124.37	399.989	1774.48	301.637	728.13	155.308	410.966	31.7152	231.425	52.3081	220.753	673.102	255.516	666.405	243.568	62.093	0	482.441	72.9696	565.425	210.222	401.565	1072.31	274.318
H358	Afat + 849 0.9	6	373.504	41.1559	65.434	114.78	67.603	232.135	102.326	120.909	531.175	251.266	775.309	1240	1065.68	85.2693	381.847	74.7366	152.624	0	268.616	235.871	67.0447	670.333	0	164.039	656.763	319.088	405.027	299.136	174.797	247.74
H358	Afat + 849 2.7	6	45.236	11.3104	384.303	11.9026	3.72151	1970.15	703.656	1060.72	3374.83	1347.46	471.125	320.83	535.642	10.5395	1225.02	50.5032	400.268	1022.65	2232.37	2061.65	311.404	789.696	847.683	162.791	340.518	197.176	278.912	78.7411	161.049	3.07583
H358	Afat + 849 24	6	869.035	1.21863	224.325	10.7467	53.0749	1016.23	162.35	345.55	3220.87	1087.67	1022.38	192.753	67.6995	1.2611	904.588	0	163.872	873.757	488.55	1859.31	495.917	659.163	1460.56	18.5324	573.648	113.237	1407.84	517.042	906.488	14.0151
H358	Afat + 849 73	6	2654.73	47.2586	749.168	34.8389	60.175	1508.33	534.045	790.673	2978.28	2271.03	858.689	436.866	2656.42	201.622	2418.62	257.292	701.338	5810.43	8409.93	9153.99	3683.49	2610.96	2129.37	366.963	1808.87	1390.23	10467.1	600.096	1738.16	795.15
H358	Afat + 849 8.1	6	246.092	33.0374	279.063	75.8939	58.85	429.69	353.159	273.391	1591.14	351.979	322.261	503.728	1087.33	44.4993	1264.56	90.8898	210.999	344.259	1918.66	224.367	30.2916	374.581	1677.98	429.543	359.978	82.3883	162.884	58.985	66.4309	248.405
H358	Afatinib	6	409.705	16.5658	73660.9	165.143	81.8636	3511.48	514.946	1728.71	4239.2	55.5942	388.308	938.807	1912.56	208.47	209.853	125.352	243.464	2601.29	2755.22	1840.82	871.73	169.569	5294.68	235.936	1237.79	1006.07	1491.76	490.673	577.961	567.434
H358	Everolimus	6	2515.97	38.4179	2027.21	9.40482	51.7546	2229.77	1845.96	3197.61	877.756	1181.59	638.909	1.82286	26.7175	1821.48	528.964	457.309	1307.35	443.724	308.953	300.519	392.77	11.9721	330.761	79.9721	513.832	310.381	241.489	436.577	54.8213	33.8535
H358	Everolimus + 849 100nM	6	834.113	9.22126	813.725	31.8744	6.32891	304.197	83.1929	597.523	54.2115	171.693	162.747	20.6608	32.9797	32.0857	902.386	127.205	428.723	115.744	1545.04	157.144	778.638	883.273	594.91	242.124	162.399	383.254	316.476	1012.38	266.783	214.322
H358	RMC	6	1432.05	55.2469	110.172	121.058	67.4408	1367.9	294.926	504.191	2214.04	1626.99	1299	3433.68	4387.81	276.965	2237.62	298.513	311.793	3363.48	2040.23	2826.96	1333.53	1312.51	2403.61	497.669	491.826	163.084	3786.52	364.507	422.727	344.859
H358	RMC + 849 0.1	6	701.738	53.516	530.49	208.447	100.612	1750.39	742.456	689.016	1926.09	821.759	2963.62	2753.29	1358.87	32.9107	1383.34	217.267	453.327	1112.05	0	1206.49	414.06	1021.6	1747.42	181.282	1154.39	15.2576	1539.74	878.004	108.354	78.1023
H358	RMC + 849 0.3	6	2184.97	72.1631	588.786	7.18565	9.62553	260.186	85.9085	99.9872	617.951	588.685	1260.27	2269.01	567.873	97.9378	1456.2	685.693	953.75	1634.95	2346.83	841.02	64.6917	1222.43	1419.9	373.492	1955.12	219.417	986.734	67.1609	525.057	80.7789
H358	RMC + 849 2.7	6	161.303	48.0598	73159.6	48.3743	31.6652	1407.77	259.232	387.831	221.685	1483.35	587.972	1050.38	158.084	39.4525	2041.11	408	493.378	464.702	2017	2324.48	299.794	1390.15	2288.55	110.36	1858.17	251.228	1565.1	138.628	204.522	359.887
H358	RMC + 849 24	6	1286.1	4.33938	858.665	107.676	50.1986	450.709	248.258	135.464	513.28	831.158	980.033	1657.99	483.909	30.8399	515.721	219.711	208.335	700.572	1937.91	2075.51	448.505	65.1806	577.447	305.404	342.466	132.014	847.496	294.763	257.112	300.909
H358	RMC + 849 73	6	1235.67	18.6594	441.882	141.033	54.692	1255.26	224.514	6.47936	657.614	505.862	98.4986	2595.87	479.094	78.3556	1395.24	181.21	108.366	1239.92	2867.66	1669.3	784.188	858.408	2469.72	959.715	532.304	27.6194	1656.88	280.97	138.001	544.44
H358	RMC + 849 8.1	6	1320.97	0.671492	62.8266	123.329	1.26474	577.077	90.6612	236.088	2301	670.261	2065.79	724.021	828.462	22.1957	1116.89	317.024	278.166	2211.11	2181.93	3068.37	1145.14	842.474	2771.13	256.716	883.913	319.507	2601.58	30.8309	323.697	386.169
H358	RMC+ 849 0.9	6	586.065	7.56025	16.9242	0.701243	24.1228	317.881	294.631	73.3441	1567.78	185.43	1205.2	760.038	180.042	7.02238	893.342	180.134	135.898	460.078	255.516	1353.1	718.119	42.2723	1000.31	174.446	195.351	85.3489	534.873	344.628	703.547	157.347
H358	Vehicle	6	400.905	8.02799	48.8796	6.78752	5.68191	465.186	131.727	370.109	2342.35	394.777	5789.27	351.231	648.471	1720.39	320.457	9.65881	830.227	0	938.813	183.696	233.371	700.217	224.367	188.761	1181.59	202.362	655.23	173.799	261.098	474.072
H358	Vistusertib	6	410.168	30.9017	412.177	71.9993	12.0965	1588.58	757.907	2586.67	1546.26	431.993	720.909	33.2173	79.4385	3658.51	1247.68	99.2996	2622.11	77.8234	434.683	168.105	612.026	1085	1526.63	840.99	1665.64	30.8425	1384.22	660.097	214.232	501.825
H358	Vistusertib + 849 100nM	6	502.921	10.0287	1055.18	55.6944	42.5775	2158.68	821.297	836.005	3402.44	1068.77	541.424	18.1825	41.5726	101.391	3348.68	14.2731	374.097	151.242	959.832	517.111	562.296	1665.12	2656.81	56.068	971.022	92.1812	183.84	123.322	905.486	616.672
H358	849 0.1nM	24	522.081	5.90074	264.565	102.336	8.04216	2145.24	1072.65	2101.49	3125.68	1524.53	5590.98	3948.45	1152.13	1475.85	1605.54	852.33	732.124	4455.57	5164.77	1383.17	1719.3	466.746	1435.66	10.5318	2363.97	218.752	639.232	1016.55	241.822	82.6091
H358	849 0.3nM	24	160.548	34.1024	63.8535	94.8541	58.6609	803.009	498.009	922.113	454.188	1034.41	4933.29	3716.45	369.239	238.308	2213.32	197.42	449.948	0	1277.68	344.259	0	1494.91	3269.01	526.428	1172.29	963.079	116.581	744.043	635.027	273.827
H358	849 0.9nM	24	157.29	16.194	992.354	71.833	18.829	218.602	110.309	636.134	1096.8	539.746	3832.42	2406.76	839.497	444.582	780.996	98.4363	263.802	0	416.315	660.1	675.623	632.329	2041.12	262.201	480.081	235.638	599.091	137.386	631.839	277.643
H358	849 2.7nM	24	289.651	23.932	436.377	67.429	45.9192	2906.24	1028.04	1576.05	3734.36	2023.74	3288.3	6218.87	1273.3	510.049	2834	785.952	925.131	498.396	3526.75	716.67	999.307	1882.93	3750.39	83.9829	521.234	823.406	481.713	692.133	701.822	891.414
H358	849 24nM	24	170.578	15.586	850.415	56.0456	41.6674	992.446	725.949	661.654	118.767	292.514	2919.29	422.114	215.732	341.811	0	9.37357	411.09	1353.1	3546.66	1922.27	430.336	622.783	574.741	16.867	92.5354	431.96	497.769	165.019	466.97	129.665
H358	849 73nM	24	825.218	26.8721	913.785	188.059	23.2144	1791.52	677.34	1231.01	3211.96	1168.04	558.468	17.2767	48.2	25.9254	745.918	214.707	475.368	1584.4	3425.18	191.193	487.58	591.023	1112.43	101.866	447.854	18.9562	406.897	196.807	849.867	370.605
H358	849 8.1nM	24	389.188	11.9205	410.675	117.596	3.68172	2087.58	727.322	807.511	681.718	570	1792.29	1683.71	0	27.0474	0	36.0685	312.554	2301.35	3391.1	784.163	696.351	56.3528	508.736	0.850525	227.647	799.919	587.138	878.138	24.925	591.044
H358	Afat + 849 0.1	24	125.478	0.532361	135.674	0.574129	2.89097	1163.72	8.03314	12.1287	376.816	261.109	481.282	468.878	1041.57	14.357	508.736	45.2235	133.408	1859.31	3014.72	1525.65	500.923	188.925	0	264.344	560.47	371.061	629.807	311.33	685.691	295.379
H358	Afat + 849 0.3	24	69.7111	2.53621	464.531	26.3493	14.7932	369.239	35.1678	600.288	1053.8	365.154	565.758	398.771	477.244	156.337	358.309	66.5668	115.495	437.66	285.199	534.559	46.5782	145.852	1261.3	184.018	741.631	738.633	189.344	105.597	375.373	270.62
H358	Afat + 849 0.9	24	260.277	4.8697	54.2911	20.1036	11.1943	633.904	402.787	22.7997	2387.8	218.055	128.847	57.6025	452.373	57.9891	731.149	77.4302	35.558	1568.66	1918.66	1412.06	868.384	1116.92	1754.44	80.5685	1690.18	434.125	106.422	701.408	600.931	152.033
H358	Afat + 849 2.7	24	527.408	0.545212	578.455	9.08049	0.52087	824.368	17.7032	77.4846	145.807	192.626	181.347	57.3324	198.211	0.9981	1064.39	250.839	506.569	414.43	1669.3	0	327.407	633.163	273.432	338.041	772.383	719.191	122.782	250.989	736.659	684.513
H358	Afat + 849 24	24	275.546	0.0218914	26.405	65.0643	27.0914	633.904	134.614	323.67	1120.9	491.011	192.814	17.96	139.166	7.43416	946.53	23.7984	11.6538	225.486	561.967	917.724	443.907	399.743	370.673	225.374	600.652	242.104	632.333	110.457	95.5444	418.722
H358	Afat + 849 73	24	355.279	8.297	558.468	39.1408	15.7426	1653.78	35.4326	124.304	1973.59	511.702	401.431	73.7967	36.551	4.55142	189.291	55.1245	264.45	488.788	3959.09	1305.86	341.401	263.461	697.822	67.0474	414.18	284.327	551.312	704.1	258.64	763.203
H358	Afat + 849 8.1	24	904.728	2.01604	367.461	2.01519	3.4616	2019.93	131.008	404.969	1909.1	425.292	198.78	90.5262	357.184	47.4524	1153.04	75.5396	68.1734	895.81	4113.01	2270.97	291.504	222.238	1292.47	14.3025	255.167	804.385	1338.99	76.2175	88.5921	249.9
H358	Afatinib	24	1298.82	5.26366	1204.64	187.82	94.141	4710.08	1134.11	2329.51	4251.07	1431.05	2477.87	2338.71	1818.3	289.4	4068.18	362.06	666.276	2903.76	6097.65	899.552	241.63	2108.06	2998.58	327.487	89.9803	414.521	1195.19	762.793	514.585	126.541
H358	Everolimus	24	273.603	13.0924	667.182	76.8428	16.6308	582.764	65.11	1687.17	2627.3	860.317	540.349	37.0923	18.9964	2928.51	934.005	2155.12	15416.6	927.787	3400.41	96.1628	227.98	1525.59	2303.14	601.711	711.524	221.642	919.357	627.671	73.9493	159.24
H358	Everolimus + 849 100nM	24	919.964	32.1887	402.551	106.721	1.47535	1187.22	167.236	396.916	2325.54	682.637	164.742	19.2093	1.2769	118.033	1379.37	57.9861	1716.24	596.224	299.85	663.187	326.052	351.922	776.494	312.591	154.656	115.403	189.38	517.199	1923.6	401.955
H358	RMC	24	262.538	10.6245	252.149	2.35776	2.51451	982.556	140.366	523.445	1601.44	21.5364	721.664	1161.77	937.336	65.4189	1573.13	129.099	3.50301	243.054	2099.31	782.033	1627.97	614.905	2568.17	424.728	326.715	282.944	881.222	28.8362	239.111	23.8332
H358	RMC + 849 0.1	24	356.563	23.5451	168.517	62.744	32.8454	1637.33	39.2477	77.4289	814.67	660.261	468.319	1785.06	283.618	200.163	203.016	20.3365	138.434	1422.48	2867.66	1090.75	529.306	752.839	1144.77	772.983	143.836	753.732	731.638	69.3795	254.915	389.199
H358	RMC + 849 0.3	24	2471.08	31.3302	1070.84	107.26	91.8992	1829.23	768.074	919.964	907.751	909.425	1368.38	1205.5	1092.05	302.578	1141.57	0	169.137	442.038	276.797	1843.42	479.174	1088.61	1857.67	134.467	841.059	178.148	681.072	38.8256	219.747	332.998
H358	RMC + 849 2.7	24	208.983	15.0905	183.655	76.3931	12.1515	681.718	573.179	482.201	625.21	203.508	249.125	359.407	719.464	148.059	1224.36	558.85	1840.27	2325.41	3546.66	4031.59	1267.37	781.547	82.1086	338.316	536.094	27.3896	1952.82	164.756	327.542	558.234
H358	RMC + 849 24	24	489.901	39.4317	4264.29	144.648	7.75043	867.518	154.679	329.109	1932.68	817.572	4.00531	205.201	309.044	124.12	2987.65	285.601	758.472	1236.66	308.953	3861.88	546.53	939.082	2370.24	301.368	899.03	564.932	1008.21	160.223	465.256	37.4604
H358	RMC + 849 73	24	3358.34	197.133	1917.27	138.947	82.6951	4974.75	3459.76	2151.12	2588.9	1894.32	584.987	207.307	308.541	376.842	1539.74	22.5579	765.811	2762.14	4528.44	4666.35	2694.08	350.709	799.42	5.57753	967.063	3.09758	910.447	547.779	1020.14	959.203
H358	RMC + 849 8.1	24	1029.63	30.0994	846.466	158.261	18.8479	1286.1	238.592	903.897	485.625	699.688	92.5172	319.262	407.908	19.2927	1864.63	678.461	780.122	209.198	2057.75	1808.33	1264.38	1259.89	1809.18	556.156	1149.57	1538.31	1330.86	26.5129	538.721	7.89908
H358	RMC+ 849 0.9	24	490.492	9.1166	127.893	4.57011	27.4552	573.598	193.762	359.985	1657.42	697.877	354.829	199.182	663.57	169.353	1046.06	195.099	464.672	1005.06	789.893	1510.46	580.815	94.1871	321.841	481.884	92.6742	22.089	176.345	16.5249	213.344	419.027
H358	Vehicle	24	1257.12	22.1553	731.903	110.792	18.3558	279.051	320.061	721.542	2847.61	1169.04	4588.29	2150.63	15.3731	1980.39	1144.56	501.064	524.899	679.889	0	1135.44	1428.81	1361.33	2000.72	148.935	3568.78	303.205	943.258	145.17	943.141	13.0644
H358	Vistusertib	24	668.889	9.56002	251.338	28.7735	5.60727	273.622	20.1206	540.177	104.707	432.291	178.651	1.99234	66.9126	1806.9	774.993	66.7405	8013.66	163.749	1269.35	441.243	89.4932	132.064	397.779	433.766	369.239	211.854	79.4623	234.612	364.457	44.2445
H358	Vistusertib + 849 100nM	24	124.91	8.70541	269.562	28.6478	13.9357	1338.58	209.431	152.413	859.252	15.2141	36.625	8.54665	45.2233	376.962	654.987	37.1818	3422.52	37.4966	662.769	87.0359	21.0678	703.348	882.116	26.0605	316.745	225.255	409.971	312.373	1353.94	96.7314
H358	849 0.1nM	72	228.23	5.70991	290.35	357.173	16.9459	1952.74	939.656	295.626	1509.25	526.068	3471.17	2081.43	2040.23	638.553	162.924	198.027	532.508	6628.73	4184.73	2840.29	884.633	2264.55	957.778	315.293	3115.23	2222.54	388.543	1194.62	1958.65	1417.96
H358	849 0.3nM	72	224.62	10.7962	159.177	93.7737	28.0614	550.733	127.834	407.917	609.048	87.8894	1227.56	1067.21	243.054	240.427	0	78.8128	234.378	579.081	1771.14	252.973	607.778	1195	751.369	55.0644	344.259	1583.46	11.7292	1032.82	1497.86	937.926
H358	849 0.9nM	72	1132.74	66.7224	415.825	44.5341	8.57453	1187.22	243.169	446.133	1107.83	97.8232	1053.8	2449.8	1524.42	161.228	681.718	0.774218	34.0091	2812.03	2123.5	1509.25	621.927	363.238	1555.23	193.839	479.094	673.045	593.563	596.655	387.579	216.755
H358	849 2.7nM	72	284.791	50.4236	39.1546	9.672	29.4688	183.696	75.2698	414.225	1064.39	1472.28	3699.87	66.6619	0	1.24745	217.736	43.576	126.298	498.396	508.489	455.522	381.861	1640.88	1274.33	126.523	3400.73	1111.97	139.176	779.945	1391.49	141.228
H358	849 24nM	72	395.62	5.42901	24.3826	367.382	11.1428	1087.22	33.2439	49.3843	885.939	441.386	425.987	68.0844	234.794	90.7447	1025.36	59.4019	82.7687	310.964	1069.15	218.707	772.06	831.654	1199.05	0	432.877	839.712	40.2924	41.7643	288.347	603.069
H358	849 73nM	72	302.91	12.3189	187.847	87.1898	23.0795	1067.21	361.229	571.712	692.231	818.164	465.831	401.973	487.262	8.07387	268.616	13.1581	44.0677	622.714	789.893	0	589.096	365.494	891.635	149.163	855.061	93.2604	59.4444	935.8	1758.4	155.159
H358	849 8.1nM	72	143.896	22.1166	84371.7	388.009	27.0909	420.499	280.81	452.505	2295.95	874.373	2764.37	2053.07	2298	126.144	2674.86	20.8742	9.89108	2462.45	255.516	1365.64	648.783	147.17	3871.17	184.986	516.937	122.786	414.097	939.062	508.852	457.949
H358	Everolimus	72	624.489	3.71217	1033.36	148.474	48.1502	3439.71	989.515	2779.37	3927.09	2395.45	2382.43	33.2806	31.45	265.86	816.165	983.272	712.861	977.127	2226	503.658	0	1910.35	3751.76	946.747	3676.13	834.851	381.142	1000.6	213.722	154.557
H358	Everolimus + 849 100nM	72	279.784	6.45069	371.965	19.4867	43.6523	1064.39	134.254	142.464	318.237	143.752	573.531	20.9368	9.89416	527.758	6368.99	29.0505	838.732	2141.01	4183.53	1505.16	2393.89	2097.26	3424.4	840.378	2807.52	780.507	170.248	299.909	1903.73	169.282
H358	Vehicle	72	203.447	11.0139	12860.9	137.653	16.7932	1187.22	139.175	200.283	1682.38	203.855	4914.64	1056.59	416.315	339.874	502.233	28.8323	145.604	2418.3	2346.83	1339.66	144.033	2226.38	1121.93	230.646	774.276	524.008	91.0181	145.102	638.198	831.079
H358	Vistusertib	72	434.877	25.5764	1390.62	338.226	21.0093	3148.37	1380.92	2496.38	4193.31	2195.99	592.872	66.2335	98.9409	59.2071	3410.59	205.177	966.939	794.986	5248.04	2787.81	465.785	2421.97	5909.7	1224.36	2228.11	131.426	527.343	1153.32	108.104	437.779
H358	Vistusertib + 849 100nM	72	818.384	5.38124	43099.8	76.8838	27.4096	1050.36	305.126	539.746	1171.1	475.168	478.07	7.69222	11.6898	82.2766	1813.31	29.7723	121.196	62.758	286.237	16.1285	1058.61	694.006	65.6306	456.624	536.985	24.498	541.813	670.936	1756.5	1039.53
KYSE-410	849 0.1nM	6	603.007	615.193	477.885	1778.73	1065.27	2204.66	1198.02	2330.32	5623.64	4169.95	42.6017	4919.47	0	1321.07	478.743	753.681	572.299	1405.24	2987.65	376.456	1334.25	822.376	2646.04	823.612	489.832	1225.53	457.463	108.271	78.3387	120.314
KYSE-410	849 0.3nM	6	376.68	970.728	1766.18	1129.92	1056.88	425.802	542.927	1391.26	3171.34	1687.17	1952.75	1350.14	213.404	1508.48	873.248	679.232	805.265	1496.39	3096.82	673.402	570.96	56.3528	743.893	0	778.803	375.557	255.18	316.189	822.84	298.466
KYSE-410	849 0.9nM	6	399.991	340.209	718.861	3277.68	1193.09	1640	1127.02	2887.46	5722.3	2537.44	2151.99	3034.11	1088.75	906.28	206.859	1386.59	1086.77	831.143	2804.3	201.099	996.105	1437.36	1753.52	707.964	706.777	1496.23	711.899	55.5538	484.819	148.309
KYSE-410	849 2.7nM	6	380.483	428.424	373.692	839.497	50.0178	1340.79	0	3596.35	247.964	0	2116.88	1025.36	824.368	1197.58	550.009	2892.56	1509.28	327.485	376.68	649.896	563.381	114.604	1556.46	734.393	1125.1	1095.79	553.591	177.441	600.931	17.2253
KYSE-410	849 24nM	6	0	823.315	516.476	2228.11	810.501	1725.18	402.512	713.312	2588.7	2353.74	661.866	6556.79	464.702	431.057	1441.06	596.533	186.28	503.658	2627.43	792.754	597.892	946.143	1687.63	985.403	996.911	477.969	30.2786	207.017	700.564	319.103
KYSE-410	849 73nM	6	1005.06	2221.02	605.169	2951.47	1654.29	1926.28	1382.74	1553.89	4186.48	2813.68	1058.16	4679.54	1408.33	142.257	253.774	1076.97	137.507	1663.33	866.634	0	66.7158	1299.08	113.424	78.7314	419.557	74.5433	903.17	178.539	223.412	213.646
KYSE-410	849 8.1nM	6	191.193	1815.09	10.0004	1557.46	1022.54	257.776	624.597	193.115	2734.66	2401.31	575.115	2575.4	911.067	549.281	1354.71	65.11	666.858	0	0	201.703	1292.97	947.544	412.153	1178.91	899.726	336.451	526.816	114.64	28.0097	331.791
KYSE-410	Afat + 849 0.1	6	3017.67	28.7542	367.887	2945.26	45.1212	4028.72	470.946	2194.62	5424.65	3824.57	803.99	5493.88	1365.64	119.53	1770.64	297.875	66.6888	159.683	5069.29	107.706	697.709	2974.87	1932.93	511.142	1149.87	821.814	308.417	324.968	57.2301	1133.04
KYSE-410	Afat + 849 0.3	6	396.011	53.7557	263.899	514.202	0	518.996	24.0841	1903.89	929.472	1167.71	911.728	3302.11	965.65	42.3663	28.0285	70.6276	96.0821	901.314	1025.36	152.126	755.473	129.967	317.392	417.175	1287.41	457.364	552.742	98.0466	1151.63	674.074
KYSE-410	Afat + 849 0.9	6	200.996	6.91311	501.182	1956.63	65.7016	3047.25	789.452	2098.36	5037.85	4193.61	772.612	2560.74	1721.27	62.6868	708.136	654.387	36.384	101.111	2524.41	288.364	1688.49	1416.04	854.982	764.779	407.908	656.639	584.758	216.567	155.003	158.637
KYSE-410	Afat + 849 2.7	6	1961.08	6.63015	236.725	573.02	96.6707	2437.94	220.094	1043.39	3533.25	213.404	439.51	5060.73	176.493	185.264	1914.59	350.927	201.033	1642.51	4254.16	234.876	1315.7	1354.81	860.962	1036.94	759.594	792.252	700.878	344.761	771.873	569.272
KYSE-410	Afat + 849 24	6	1005.06	1.32035	459.031	2630.73	118.832	2751.82	1066.83	1314.34	5427.15	3204.3	38.0302	356.001	823.333	79.1398	59.5986	60.1807	261.353	2453.28	1940.73	310.889	538.571	1484.81	250.21	296.791	634.273	434.731	1716.87	572.227	1518.07	643.588
KYSE-410	Afat + 849 73	6	455.522	13.411	1160.03	2579.28	77.025	1885.27	375.557	493.938	3989.08	4541.24	65.7203	2504.23	0	7.92669	1231.97	245.931	251.153	134.295	1979.94	79.851	622.632	1250.48	245.931	69.7689	523.723	316.334	538.041	121.986	620.715	215.702
KYSE-410	Afat + 849 8.1	6	1979.94	39.4252	1046.09	757.4	12.8232	3102.53	1328.79	722.394	2846.26	2493.05	198.529	115.271	2915.14	77.809	58.7267	114.489	116.404	1197.29	3108.55	1512.49	2362.31	739.714	118.808	384.442	19.2377	966.7	1675.16	194.023	331.442	162.816
KYSE-410	Afatinib	6	1960.24	26.4263	672.925	967.652	40.4635	654.987	69.1643	373.066	1274.33	2166.37	414.427	3993.41	1249.07	55.4608	395.448	350.007	256.305	864.773	1099.71	1154.68	176.901	326.62	565.688	509.357	421.422	374.262	567.461	464.821	1097.05	689.544
KYSE-410	Everolimus	6	193.115	963.335	66403.8	1667.98	1240.46	347.719	1409.9	1899.54	2782.94	2144.84	71.8569	5.45708	15.1543	24.7976	892.436	1085.91	354.05	554.359	956.024	92.611	549.195	989.764	1979.94	288.215	189.735	190.329	201.687	587.741	702.673	163.518
KYSE-410	Everolimus + 849 100nM	6	2146.63	542.717	248.062	258.084	622.783	937.111	648.471	1394.33	3046.21	743.893	99.031	25.484	140.506	672.528	1038.33	2733.7	1710.71	168.882	2746.64	446.255	161.111	1454.27	1336.94	459.527	42.7496	393.274	382.829	39.7686	691.982	278.278
KYSE-410	RMC	6	2211.11	1265.6	851.413	2560.93	83.7101	2196.43	2249.95	2812.73	3197.04	5389.08	649.173	1940.73	729.163	84.0927	110.075	7.15331	495.578	166.199	627.616	272.364	1186.06	1845.13	1570.9	306.708	531.949	225.857	352.201	94.3214	32.5864	12.6277
KYSE-410	RMC + 849 0.1	6	3267.94	1513.86	1712.3	2437.94	1565.57	1510.32	2579.59	2737.1	1604.91	2575.4	1056.65	1287.13	0	121.154	312.523	523.463	321.735	1310.46	975.356	455.195	473.547	178.786	29.0533	65.8961	1340.76	329.446	1049.84	443.308	358.144	295.123
KYSE-410	RMC + 849 0.3	6	0	1823.84	1036.15	1077.93	3359.73	2143.64	1667.18	2665.46	4226.78	2595.83	2298.94	4578.82	2648.24	169.493	246.721	2843.19	1987.98	1769.92	3017.67	622.699	578.483	1204.88	749.474	11.2186	201.695	1135.99	567.448	213.572	258.242	472.629
KYSE-410	RMC + 849 2.7	6	2874.87	1941.59	451.445	1313.11	800.023	1990.38	1710.58	1616.18	6892.95	5164.77	1582.17	9170.92	1326.33	177.724	1276.23	4182.4	723.606	1254.86	10411.6	1065.32	1112.26	2592.14	1664.56	1868.28	1041.27	189.75	1695.57	372.55	242.866	947.012
KYSE-410	RMC + 849 24	6	1380.46	1377.42	475.372	493.685	1175.4	718.64	337.241	570	2113.47	3139.81	1193.96	2295.95	573.598	27.415	1138.3	444.687	567.205	1022.13	709.539	781.849	1151.56	674.494	122.085	226.05	48.6708	781.878	1615.58	412.328	329.116	903.982
KYSE-410	RMC + 849 73	6	646.71	3571.48	2661.53	154.978	3067.75	175.959	1111.44	224.541	1714.87	768.635	71.0257	1919.11	1792.29	201.221	938.452	829.784	763.317	634.043	3367.71	1493.04	1319	773.867	74.3221	1075.33	1141.35	431.021	1439.71	19.5043	714.298	523.522
KYSE-410	RMC + 849 8.1	6	800.023	567.873	29.4164	3360.95	1299.02	1975.25	3069.64	749.344	1699.29	1494.25	1689.4	4496.06	776.36	3.47257	1450.28	1768.23	333.406	958.67	171.277	929.447	628.197	1053.68	330.057	917.542	825.976	874.208	2525.81	357.928	79.3829	333.248
KYSE-410	RMC+ 849 0.9	6	2255.8	806.579	43.5493	1568.66	317.791	480.2	1461.5	1541.98	841.02	1326.33	989.97	1738.57	1300.05	68.6761	1538.36	335.322	621.626	1586.5	2746.64	1389.46	1888.11	756.507	62.0152	925.561	1256.89	659.271	1880.71	260.536	1753.13	67.3988
KYSE-410	Vehicle	6	195.037	17.7054	611.837	1481.51	533.676	983.038	1141.06	2562.94	0	603.007	1841.34	3972.21	442.038	1641.48	1216.87	1983.77	916.928	1211.22	653.23	523.685	700.356	506.126	4230.09	1694.81	1098.15	203.926	572.57	60.1049	906.885	194.178
KYSE-410	Vistusertib	6	2562.94	1465.05	235.022	428.974	1096.38	307.183	65.6694	813.948	2124.42	1075.1	101.04	35.5529	35.423	1667.98	928.792	82.5505	1364.81	51.9979	154.494	19.8076	866.928	1238.66	2927.52	1519.49	1037.35	638.615	8.62423	97.6552	372.332	282.104
KYSE-410	Vistusertib + 849 100nM	6	1792.29	1091.49	214.568	222.113	637.91	1211.22	192.623	233.524	4340.12	372.932	92.0322	18.8293	34.7077	870.979	1232.38	3.19747	2562.87	715.865	74.3104	30.1415	592.63	233.012	1490.21	130.811	672.296	1015.34	749.061	270.098	716.761	156.555
KYSE-410	849 0.1nM	24	1866.2	2679.51	473.929	827.137	1995.55	946.15	866.504	0	2082.37	2303.64	625.842	4296.92	433.305	696.712	1284.03	1829.96	347.878	164.561	2183.99	174.814	557.198	2585.44	3912.42	645.494	738.299	293.562	614.773	500.95	883.675	129.813
KYSE-410	849 0.3nM	24	946.53	1246.54	7.16763	974.544	1659.99	207.62	42.8999	0	1365.64	972.779	753.879	1421.37	920.223	189.374	263.158	411.614	438.355	1637.33	0	217.744	0	822.873	929.472	561.763	958.334	261.601	192.619	33.6255	764.426	709.205
KYSE-410	849 0.9nM	24	0	2328.77	83.0447	1676.72	1502.72	1099.21	794.925	1339.66	3674.61	2181.73	831.032	2083.18	404.011	240.26	1085.6	2893.01	661.121	683.999	642.018	237.917	62.3872	2838.77	3261.6	1152.13	931.742	94.5558	208.247	296.981	1051.79	498.46
KYSE-410	849 2.7nM	24	384.307	2144.76	937.014	642.018	3194.21	931.349	1481.51	228.9	858.011	847.917	2130.94	3942.68	2776.4	2253.41	638.559	1687.72	2587.62	963.115	0	292.192	622.884	254.782	918.538	807.57	94.5764	161.501	842.952	114.422	734.606	251.443
KYSE-410	849 24nM	24	1884.94	965.65	276.662	189.291	181.868	561.036	882.521	263.272	0	873.757	2869.55	646.71	1300.05	6836.11	56.4093	22.4485	911.245	1118.75	2255.43	235.12	428.257	380.483	264.211	61.7021	1425.23	22.2769	1694.38	351.181	828.921	762.993
KYSE-410	849 73nM	24	545.606	529.498	311.525	937.111	1777.59	87.6646	347.719	1861.92	416.315	158.109	1483.9	2001.5	3016.69	1254.66	1129.57	219.791	776.145	1529.99	1526.63	765.292	1727.52	648.471	271.455	4.86261	275.271	16.1472	499.429	202.433	393.622	9.57227
KYSE-410	849 8.1nM	24	661.57	1570.84	694.475	1448.04	226.622	449.857	0	659.774	1300.05	174.737	1634.68	1539.74	1380.46	1189.94	332.255	1407.06	1731.75	0	1496.39	217.309	404.934	1527.98	1200.99	651.164	1029.85	159.135	214.34	207.045	479.157	187.836
KYSE-410	Afat + 849 0.1	24	518.996	20.0913	30.9735	1487.24	45.5466	2325.41	734.092	1422.45	4319.76	2021.63	666.7	948.217	226.638	61.3624	1672.23	40.5719	160.101	803.812	975.356	331.428	273.078	1692.03	294.39	78.3102	239.924	482.297	200.096	526.62	3033.45	647.898
KYSE-410	Afat + 849 0.3	24	2151.16	12.7801	441.487	718.505	45.33	433.305	433.518	337.459	1176.35	187.389	227.332	488.178	699.087	327.701	123.394	536.37	341.24	721.305	380.483	0	664.717	188.055	20.5619	361.735	88.2428	190.414	89.393	146.921	1107.3	6.4316
KYSE-410	Afat + 849 0.9	24	1526.63	7.39505	271.807	270.09	67.7174	2804.3	688.044	770.959	2025.89	918.538	3.98534	90.1124	187.736	203.688	1408.58	226.803	223.794	1232.22	2537.44	7.08955	611.617	1325.46	228.751	105.959	205.712	319.195	269.869	65.3065	911.655	200.16
KYSE-410	Afat + 849 2.7	24	529.498	1.19971	1576.2	1141.53	68.6671	1408.33	577.877	1359.37	2510.24	1846.08	163.991	6.61205	0	107.408	772.624	101.802	79.7391	526.429	1200.1	12.868	575.024	396.832	162.635	74.2678	122.763	162.636	1249.88	527.148	876.306	711.001
KYSE-410	Afat + 849 24	24	1653.78	3.58737	348.738	124.716	42.5195	743.893	227.399	402.816	518.306	603.007	21.9349	81.5856	105.204	133.624	1028.11	27.4552	6.4543	474.744	437.66	374.788	116.092	197.011	1.86097	562.421	31.0355	67.0292	108.32	50.4652	99.2449	88.3014
KYSE-410	Afat + 849 73	24	361.91	32.1551	380.686	1479.2	41.0904	1699.29	277	1462.95	789.859	1903.89	7.72043	303.732	1061.83	256.801	1013.4	143.931	231.252	168.461	1539.74	24.8922	356.665	1262.31	186.427	454.901	38.2687	346.921	1080.93	84.2754	761.374	71.4566
KYSE-410	Afat + 849 8.1	24	4003.85	76.1761	576.207	1541.66	61.6995	1682.38	131.511	520.174	1444.61	1847.62	443.207	222.444	976.489	153.359	822.597	6.40919	567.395	2148.59	3525.13	1217.65	2789.24	1668.2	142.152	630.681	539.448	1556.7	4876.69	21.8376	592.669	534.728
KYSE-410	Afatinib	24	2307.15	26.2308	323.208	130.268	71.3375	597.007	214.81	695.49	1846.9	1721.27	276.42	942.123	1756.82	750.718	1337.28	283.058	496.402	652.226	2255.8	358.509	89.3462	2054.8	769.885	661.368	1704.73	118.677	756.07	399.8	924.913	739.265
KYSE-410	Everolimus	24	446.48	953.815	62.3872	2190.01	916.86	342.083	588.402	652.912	2168.2	731.149	24.3624	59.7432	82.6395	5214.49	248.069	1099.71	3298.63	241.231	813.948	16.0045	396.945	0	394.675	64.98	106.925	566.031	17.0002	383.075	87.3815	611.984
KYSE-410	Everolimus + 849 100nM	24	1809.53	1580.13	165.879	1960.24	1004.28	326.933	530.235	1469.68	975.356	0	34.2125	2.57913	9.62544	8870.63	147.532	2411.81	15357.5	430.359	1788.92	4.73308	206.176	588.523	413.014	401.759	678.959	345.032	1111.78	406.521	0	105.626
KYSE-410	RMC	24	738.496	1069.15	153.351	2284.18	488.55	436.36	891.408	408.052	493.685	661.57	1425.07	1604.91	1366.7	512.448	154.098	444.867	381.087	754.48	1407.21	496.65	916.45	403.794	941.625	343.408	40.4652	1606.95	1449.22	1245.77	281.313	500.128
KYSE-410	RMC + 849 0.1	24	591.048	1443.2	231.924	2748.77	1724.66	2878.3	1249.07	2734.66	5563.9	2462.45	2111.89	9376.07	1786.41	645.59	2253.69	5306.4	1710.27	185.507	2168.2	6.40818	740.112	2710.89	1572.85	1106.94	1049.09	484.675	628.196	186.535	537.134	195.615
KYSE-410	RMC + 849 0.3	24	1553.03	2320.1	297.394	2167.35	1724.66	2174.05	2653.84	1088.75	2721.42	738.496	0	4278.32	1716.36	16.8463	1075.83	1473.05	935.54	402.426	3530.53	322.078	394.852	1398.67	487.012	142.061	696.386	387.769	534.128	276.544	569.482	282.37
KYSE-410	RMC + 849 2.7	24	424.705	417.082	763.358	3422.52	1328.66	2530.4	5935.51	3638.04	4101.88	3368.56	2028.14	3095.4	1352.04	406.505	1070.06	1148.15	1578.29	888.685	2462.45	218.649	1008.58	1431.5	405.613	153.95	1259.35	673.086	345.782	16.9776	633.567	610.388
KYSE-410	RMC + 849 24	24	2211.11	2566.18	943.847	1509.25	5072.87	1726.55	5479.17	843.654	3917.92	3017.67	482.621	2665.95	361.91	6.61205	1928.27	839.505	412.957	620.672	2216.67	97.2259	212.525	974.99	126.648	538.534	62.9387	75.8972	727.036	1943.31	1289.94	399.547
KYSE-410	RMC + 849 73	24	1883.37	4825.46	238.756	217.736	3292.43	858.215	3576.86	718.791	330.761	615.169	1363.23	1973.18	927.787	185.207	984.339	1432.89	1386.87	764.983	1153.04	193.586	602.728	486.584	122.534	244.971	349.301	996.155	68.1045	370.858	1070.06	17.2342
KYSE-410	RMC + 849 8.1	24	1941.59	1693.65	384.973	0	451.777	642.018	503.405	598.436	358.309	591.048	226.142	2191.88	927.787	57.4808	435.493	2103.92	35.01	48.6618	1419.36	50.3188	1072.54	1473.76	66.4698	466.317	70.3427	534.778	198.667	30.633	860.166	536.571
KYSE-410	RMC+ 849 0.9	24	609.048	0	316.296	245.497	846.782	365.565	1101.71	679.889	1718.77	875.343	88.6027	1922.27	1600.33	125.354	0	626.379	654.682	150.826	0	189.596	814.326	156.982	154.075	215.919	202.285	270.375	675.165	96.5198	294.926	426.201
KYSE-410	Vehicle	24	396.011	385.598	56.1279	0	550.671	29.732	706.215	545.332	1667.98	900.367	800.092	3035.48	1287.13	203.73	728.31	833.5	1070.89	330.761	1032.95	391.725	11.7467	709.539	1701.67	1105.47	522.553	244.707	941.088	281.23	587.598	84.1749
KYSE-410	Vistusertib	24	1212.18	2133.13	998.646	4669.04	2379.27	1868.29	1949.33	5800.24	5055.61	2187.92	227.887	5.20372	23.935	3233.28	1811.89	4.27598	1412.06	614.305	360.095	32.5832	287.452	1903.89	2484.12	1247.8	990.103	203.259	973.809	173.567	922.434	379.398
KYSE-410	Vistusertib + 849 100nM	24	198.996	63.7112	219.78	478.854	453.194	249.699	320.985	1112.78	164.561	67.8048	82.604	5.5463	16.8084	3912.42	74.0336	59.2024	2300.36	278.928	225.692	42.6756	688.316	1175.97	613.062	433.79	622.814	225.69	36.5482	673.311	1477.71	455.581
KYSE-410	849 0.1nM	72	189.291	3228.23	270.243	222.113	3180.05	1883.96	2000.72	149.484	3367.45	911.067	676.144	54.2787	562.222	1891.13	607.778	223.336	357.707	1075.1	203.016	190.196	471.162	164.561	299.378	943.242	255.884	147.586	264.312	423.122	824.336	49.5783
KYSE-410	849 0.3nM	72	2041.93	2115.25	6.96972	205.037	932.015	459.092	1922.27	731.149	2719.31	205.037	394.426	1175.4	392.052	2547.78	777.916	897.823	28.5349	534.802	808.044	188.996	15.1891	1012.48	159.268	498.77	1388.51	123.873	335.287	311.005	1071.8	601.798
KYSE-410	849 0.9nM	72	380.483	4171.58	1351.71	3083.34	7493.96	1496.39	4348.88	1704.9	380.483	1935.19	1808.33	2550.22	927.787	2407.61	1589.62	293.046	399.465	508.736	627.616	145.137	707.221	166.199	286.834	194.442	414.137	272.523	23.128	404.409	80.8411	131.034
KYSE-410	849 2.7nM	72	909.416	10134.5	430.404	9358.62	12175.3	8376.19	12378.3	3817.71	5191.28	9640.24	154.146	3342.85	1759.91	808.562	2956.94	191.194	361.812	2086.41	4558.43	145.137	0	2567.23	1795.6	839.652	407.372	528.203	461.443	475.182	19.3124	352.459
KYSE-410	849 24nM	72	1096.8	4780.22	947.171	773.9	3231.88	0	2746.17	1286.1	551.107	2567.81	956.86	376.972	573.598	4243.75	946.53	373.661	254.093	699.841	824.368	256.489	159.683	972.521	178.048	358.646	554.338	272.726	444.986	175.487	770.002	736.988
KYSE-410	849 73nM	72	808.044	3043.67	421.792	1627.2	3096.3	2166.37	1143.55	792.044	211.301	608.772	142.41	1700.68	474.327	780.166	203.016	280.994	44.9366	23.0398	358.309	74.7936	497.316	364.694	128.719	229.174	312.641	110.896	635.153	38.8644	377.973	215.833
KYSE-410	849 8.1nM	72	1338.58	4095.62	691.698	1034.76	5373.29	0	0	0	1654.5	2323.48	732.096	946.683	1107.83	758.098	180.042	80.3386	172.839	243.138	396.011	174.246	592.482	1524.85	979.588	43.1382	837.834	572.591	6.61769	314.42	9.62703	483.089
KYSE-410	Everolimus	72	181.868	2445.22	631.296	1064.39	1943.73	47.7459	41.259	579.344	241.695	708.476	194.151	43.8972	6.07819	1456.09	57.7795	350.517	995.914	1228.54	1999.81	533.421	523.184	177.809	616.833	764.697	203.548	927.612	882.521	147.993	91.3013	36.9307
KYSE-410	Everolimus + 849 100nM	72	618.919	1466.56	127.746	822.873	1400.99	353.797	681.198	1498.67	500.88	76.72	88.5499	1.37305	14.412	2575.4	515.829	251.251	672.084	276.701	945.742	162.695	163.931	273.853	84.3315	354.947	198.125	511.117	0	243.383	176.094	169.69
KYSE-410	Vehicle	72	2437.94	747.068	163.245	3022.27	730.148	1573.13	1846.08	2499.31	474.112	1156.09	1305.22	2849.65	792.044	2612.05	150.534	2.04741	306.307	1022.65	209.198	223.982	856.794	882.521	540.984	685.364	218.417	849.065	251.432	281.786	807.008	439.835
KYSE-410	Vistusertib	72	235.871	94.4766	150.369	0	66.772	432.768	83.4726	2117.44	1225.15	732.354	96.1495	129.257	22.0735	9990.89	467.811	32.7173	3759.01	114.088	1190.51	137.399	320.985	317.791	1284.1	63.0772	787.491	858.511	580.655	207.982	395.207	9.94302
KYSE-410	Vistusertib + 849 100nM	72	922.03	1630.04	1973.79	2060.86	1553.52	1140.44	1265.26	1795.67	457.09	710.096	217.581	4.69151	1.36624	1871.93	813.096	58.56	1036.59	120.42	313.523	59.7291	279.289	951.825	501.728	926.871	1033.94	464.355	2149.09	271.161	571.742	83.4898
MIA PaCa-2	849 0.1nM	6	344.259	66.8106	494.395	47.2482	74.1735	205.778	329.903	278.594	222.113	946.53	1884.94	1684.76	2078.45	58.2349	265.943	36.9142	168.175	1032.95	550.813	810.383	620.616	446.48	822.129	670.922	1349.29	321.732	355.088	535.947	111.851	212.604
MIA PaCa-2	849 0.3nM	6	1096.8	4.53218	846.486	0.754751	26.3416	216.393	227.698	685.929	288.093	640.275	327.485	847.166	288.093	877.614	0	6.58423	411.288	376.816	0	926.906	306.204	488.55	590.751	1759.39	1885.85	92.8587	233.361	171.84	28.1591	1838.21
MIA PaCa-2	849 0.9nM	6	167.886	18.0472	76.7108	38.6256	75.7085	518.718	110.398	544.274	686.7	1884.19	701.758	1806.9	908.622	282.835	1619.96	21.8879	161.004	1248.09	1996.96	895.81	1217.09	0	1412.06	61.3865	1028.45	819.462	129.44	54.5643	119.192	743.831
MIA PaCa-2	849 2.7nM	6	1085.91	61.2267	994.196	20.2735	34.4143	1878.8	381.623	2003.79	4769.42	1600.33	10967.2	5264.32	1572.11	2815.25	3306.89	152.005	502.185	0	1384.1	1681.87	1457.46	5628.81	6242.71	610.553	913.833	1987.95	473.669	727.21	552.359	915.354
MIA PaCa-2	849 24nM	6	668.219	31.7849	475.732	74.8641	146.779	2753.67	1291.36	1883.79	6055.44	1448.04	1193.26	2344.61	1792.29	136.136	3858.88	173.779	463.412	71.8538	3373.69	1481.51	626.633	4264.69	1853.92	337.493	3518.52	1724.31	289.46	1351.62	1219.04	1926.66
MIA PaCa-2	849 73nM	6	445.366	31.5328	1736.18	30.4792	101.535	2404.41	636.491	657.191	1772.55	1377.42	329.445	2072.63	680.896	83.7606	917.724	41.8351	194.292	1535.48	1239.92	865.063	1358.2	1428.84	1059.78	32.1532	336.038	1173.99	44.3226	925.02	52.7536	294.058
MIA PaCa-2	849 8.1nM	6	337.459	27.8096	743.086	42.5051	2.4879	656.024	968.452	1082.09	3177.22	1810.31	853.481	4690.05	1667.98	15.3702	2316.85	23.6584	149.631	845.213	4239.67	712.948	315.42	2316.85	1337.27	417.657	53.5898	273.442	216.715	400.171	1158.89	967.343
MIA PaCa-2	Vehicle	6	45.4617	64.5381	496.098	48.3319	63.9818	2071.42	1240.27	2002.47	5375.55	1809.53	4309.39	10761.2	290.988	820.112	1957.39	173.315	70.2305	1620.86	4765.69	880.491	362.696	1112.78	5336.05	588.186	827.299	215.24	162.296	705.76	381.51	959.148
MIA PaCa-2	849 0.1nM	24	368.345	14.6523	854.401	10.2051	48.3622	1362.51	163.276	1386.75	2776.4	369.239	1571.4	4558.43	2040.23	250.31	774.276	19.9687	2.70855	464.702	2057.75	292.585	431.925	3834.95	2891.06	1270.6	2178.62	1103.51	405.993	86.378	681.113	262.794
MIA PaCa-2	849 0.3nM	24	344.039	80.1313	321.521	52.8873	1.91101	1161.34	552.507	0	1921.4	1005.06	519.712	1103.85	3078.65	275.697	263.272	5.7047	73.0706	2420.31	2700.69	627.765	403.923	3288.3	0	885.392	2275.93	557.064	17.8458	82.9793	528.993	747.878
MIA PaCa-2	849 0.9nM	24	869.035	55.7814	426.211	41.885	34.6789	130.599	387.003	166.599	0	1537.58	488.636	369.354	1653.78	135.492	1343.16	13.0337	0	420.499	1090.75	768.53	88.3299	1602.57	351.844	158.244	150.997	1416.69	77.8625	387.822	672.676	52.1568
MIA PaCa-2	849 2.7nM	24	1688.52	4.18059	1004.74	80.7773	28.2746	1551.94	435.634	532.088	4669.04	384.307	324.339	2701.92	2688.54	141.784	3209.18	53.491	0	591.048	6642.98	1167.24	1039.91	3463.31	7038.63	277.532	575.971	1763.18	48.5819	204.198	1105.52	72.5791
MIA PaCa-2	849 24nM	24	1040.93	36.4402	769.099	2.90836	20.8016	2571.68	549.581	772.203	5760.09	2061.65	280.868	168.853	282.702	183.93	3539.19	14.8446	0	1475.41	4826.66	12.8145	224.669	1585.44	2847.52	446.941	1050.88	822.751	676.582	72.9802	1424.23	1770.57
MIA PaCa-2	849 73nM	24	11158.8	36.4844	10.3152	3.0478	28.3312	317.061	64.3978	369.778	729.163	1121.93	294.909	81.9177	103.227	94.4681	1345.63	1.08678	0	460.156	299.85	776.824	255.859	34.428	460.725	169.848	71.3276	715.487	440.683	75.7383	224.669	1129.25
MIA PaCa-2	849 8.1nM	24	844.485	102.967	1357.94	16.9548	68.4909	2192.44	1119.42	1013.99	1915.94	428.974	123.941	1947.85	1926.6	59.0117	974.473	41.1778	0	865.378	2896.51	850.698	199.775	714.376	3003.92	775.266	1556.22	45.5216	230.113	242.318	661.923	164.483
MIA PaCa-2	Vehicle	24	1526.39	54.4496	614.905	3.77612	64.2549	1074.3	1002.35	794.612	2601.29	3204.3	574.982	2389.65	1667.98	461.653	2188.17	20.5226	0	1436.8	299.85	941.651	142.031	2019.93	5666.02	659.291	514.365	207.125	108.498	13.7048	79.4461	22.1012
MIA PaCa-2	849 0.1nM	72	493.767	96.1511	594.579	23.3591	154.662	166.017	558.892	994.561	524.213	832.653	386.572	181.552	65.4245	48.0199	2248.38	18.1995	0	965.198	3365.23	572.383	177.894	1057.14	174.737	279.462	21.2822	888.053	206.316	852.298	351.958	1047.73
MIA PaCa-2	849 0.3nM	72	25.9254	22.6565	25.7612	7.3347	40.8875	497.51	132.374	528.993	2757.95	428.974	320.232	2.66082	44.5856	51.9486	1636.27	20.9268	0	210.271	268.616	1086.41	200.426	126.601	927.787	877.918	1022.28	563.012	109.332	290.933	527.483	582.386
MIA PaCa-2	849 0.9nM	72	1089.96	37.2348	425.863	8.06567	19.1078	420.803	424.9	356.191	1522.28	1200.1	119.492	22.4956	63.1683	100.41	766.572	15.8143	0	146.827	1412.06	131.944	625.457	2107.61	361.91	859.05	1987.4	342.968	98.5369	903.51	563.975	1978.09
MIA PaCa-2	849 2.7nM	72	443.219	16.0302	70.7661	44.8529	4.17071	817.423	149.814	357.06	2491.95	245.497	349.44	120.945	172.73	308.841	296.838	15.5854	0	152.336	646.71	579.867	35.9775	410.525	1753.52	72.6783	357.598	565.134	470.74	338.568	81.0578	851.626
MIA PaCa-2	849 24nM	72	134.047	3.74943	6.20016	44.147	38.433	1086.88	121.671	641.607	2078.45	627.616	355.878	211.1	727.562	168.575	1560.56	145.041	135.721	489.14	1682.38	64.98	168.806	550.136	0	958.188	1327.47	1911.07	636.343	1513.89	997.177	1148.71
MIA PaCa-2	849 73nM	72	102.625	8.63466	6.35712	41.0229	12.1728	227.328	764.841	1048.78	5052.65	2916.46	0	792.82	954.952	924.865	4954.9	172.005	171.764	866.849	5436.83	1530.89	1842.24	1346.93	1419.36	349.836	52.7009	458.128	316.423	771.525	334.159	669.408
MIA PaCa-2	849 8.1nM	72	431.472	21.7	206.656	14.0104	58.6391	109.659	561.188	199.085	1977.06	2674.86	245.378	210.03	1024.05	198.132	2057.75	59.769	0	334.215	1451.24	246.595	1072.45	220.841	1212.18	213.35	212.045	493.34	9.19694	22.1364	154.355	787.185
MIA PaCa-2	Vehicle	72	721.38	18.598	18.9679	43.0362	14.9232	1884.96	287.669	1178.54	3186.16	808.044	121.342	46.5783	234.468	194.225	1652.71	0.468346	0	1195.46	1978.62	1383.17	126	836.92	1032.95	217.014	1597.13	185.595	403.845	228.543	270.182	825.024

## Sheet: Notes
CV>5%
CV>10%
CV>20%
Only one spot analyzed
